# Supplementary material
Source: PubMed Central journal article supplement (PMC4392765)
Supplement: NIHMS677522-supplement-01.pdf [file NIHMS677522-supplement-01.pdf]

## Footnotes for Figures 1–5

### **Web Figure 1 - Sex-Specific Trajectories of AD Progression in the Predictors 1 Data, 1-D Model**

**Note:** The horizontal axis indicates the time since intake to Predictors 1. The vertical axis indicates the progression of AD using the predicted score on Pure Type I at each follow-up examination for persons who were predicted to be exactly like Pure Type I at the time of the first examination. The Pure Type predictions were based on sex-specific models.

### **Web Figure 2 - Individual Trajectories of AD Progression in the Predictors 1 Data, 1-D Model, 103 Males**

**Note:** The horizontal axis indicates the time since intake to Predictors 1. The vertical axis indicates the progression of AD using the predicted score on Pure Type I at each follow-up examination for males who displayed a range of predicted values for Pure Type I at the time of the first examination.

### **Web Figure 3 - Individual Trajectories of AD Progression in the Predictors 1 Data, 1-D Model, 149 Females**

**Note:** The horizontal axis indicates the time since intake to Predictors 1. The vertical axis indicates the progression of AD using the predicted score on Pure Type I at each follow-up examination for females who displayed a range of predicted values for Pure Type I at the time of the first examination.

### **Web Figure 4 - Individual Trajectories of AD Progression in the Predictors 1 Data, 3-D Model, 103 Males**

**Note:** The horizontal axis indicates the time since intake to Predictors 1. The vertical axis indicates the progression of AD using the sum of the predicted scores on Pure Types I, II, and III at each follow-up examination for males who displayed a range of values for the sum of the predicted scores on Pure Types I, II, and III at the time of the first examination. The sum of the predicted scores on Pure Types I, II, and III is the complement of the predicted score on Pure Type IV which is associated with the highest AD severity in the 3-D model.

### **Web Figure 5 - Individual Trajectories of AD Progression in the Predictors 1 Data, 3-D Model, 149 Females**

**Note:** The horizontal axis indicates the time since intake to Predictors 1. The vertical axis indicates the progression of AD using the sum of the predicted scores on Pure Types I, II, and III at each follow-up examination for females who displayed a range of values for the sum of the predicted scores on Pure Types I, II, and III at the time of the first examination. The sum of the predicted scores on Pure Types I, II, and III is the complement of the predicted score on Pure Type IV which is associated with the highest AD severity in the 3-D model.

**Web Figure 1 Sex-Specific Trajectories of AD Progression in the Predictors 1 Data, 1-D Model**

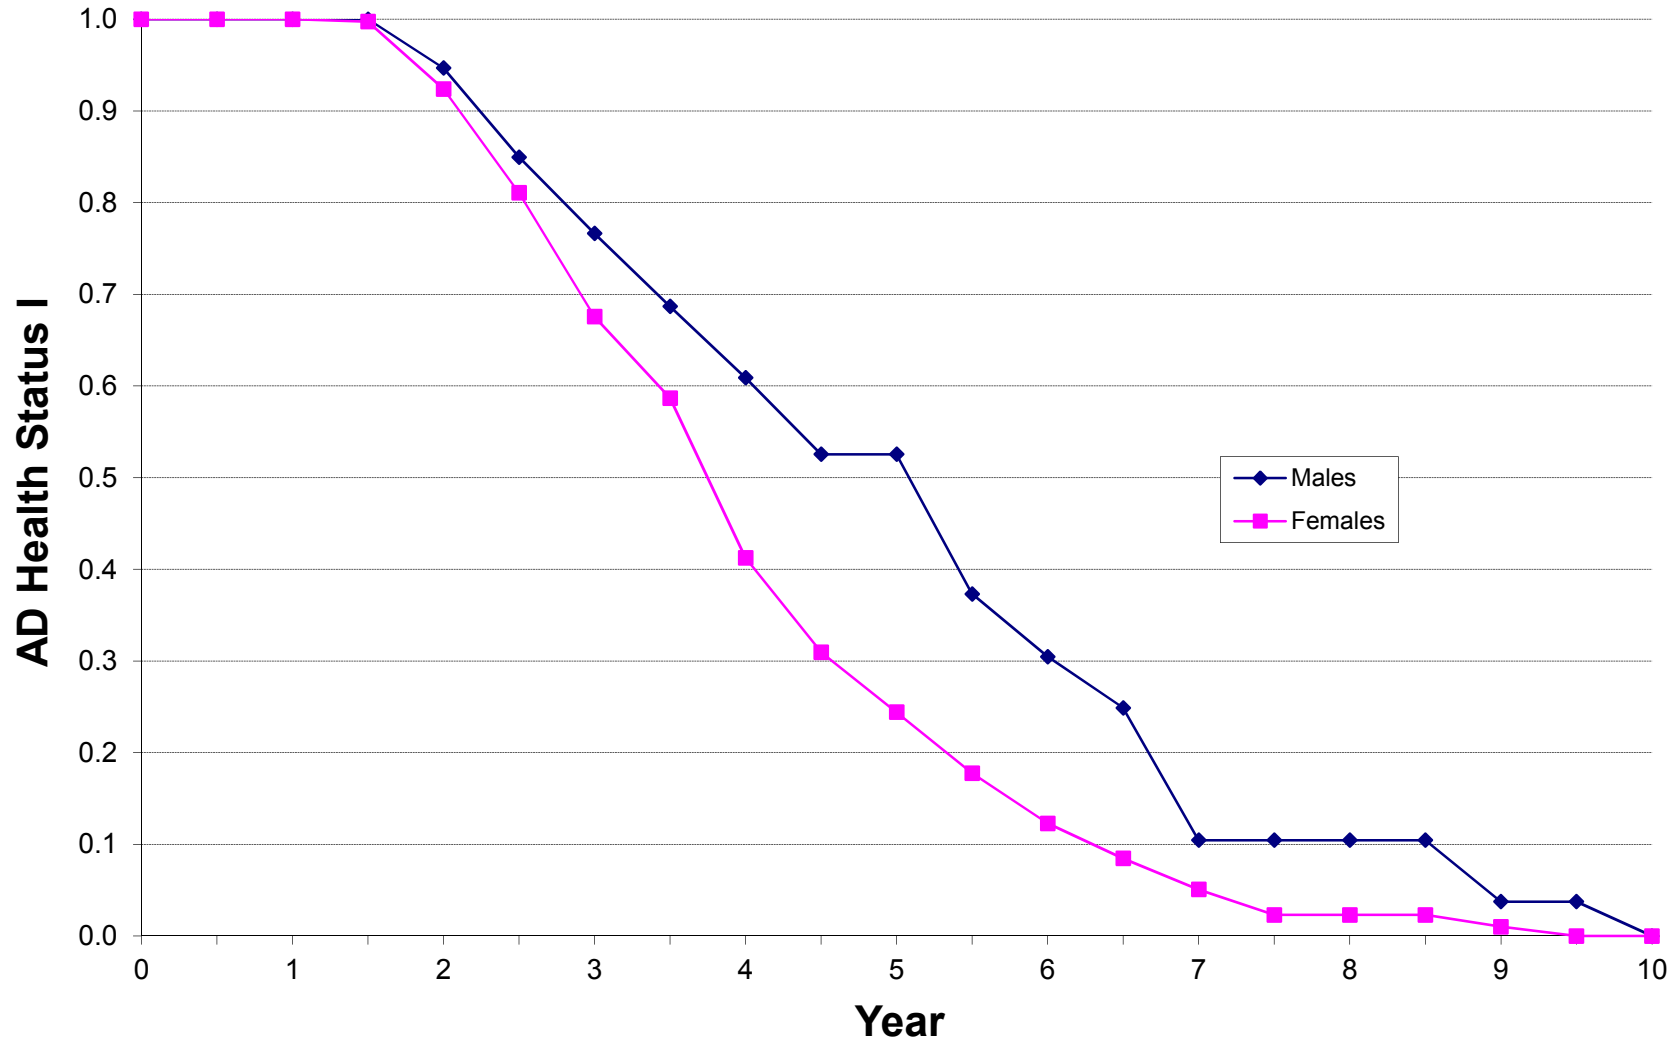

**Web Figure 2 Individual Trajectories of AD Progression in the Predictors 1 Data, 1-D Model, 103 Males**

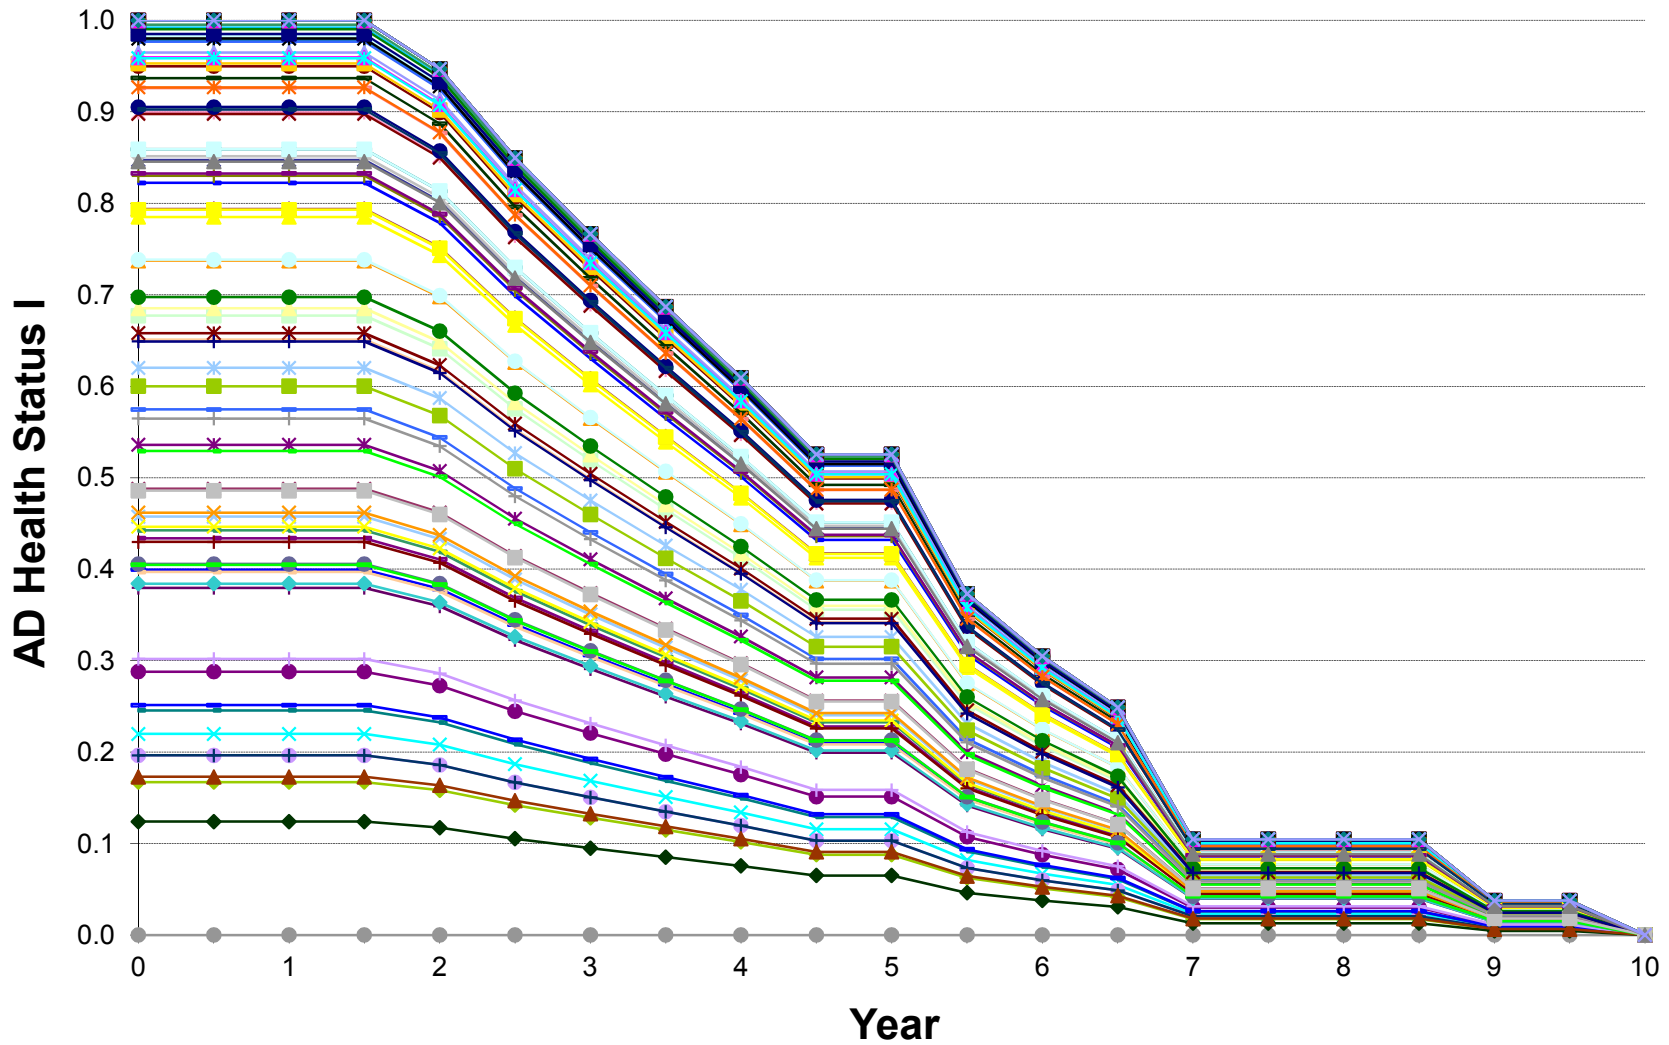

**Web Figure 3 Individual Trajectories of AD Progression in the Predictors 1 Data, 1-D Model, 149 Females**

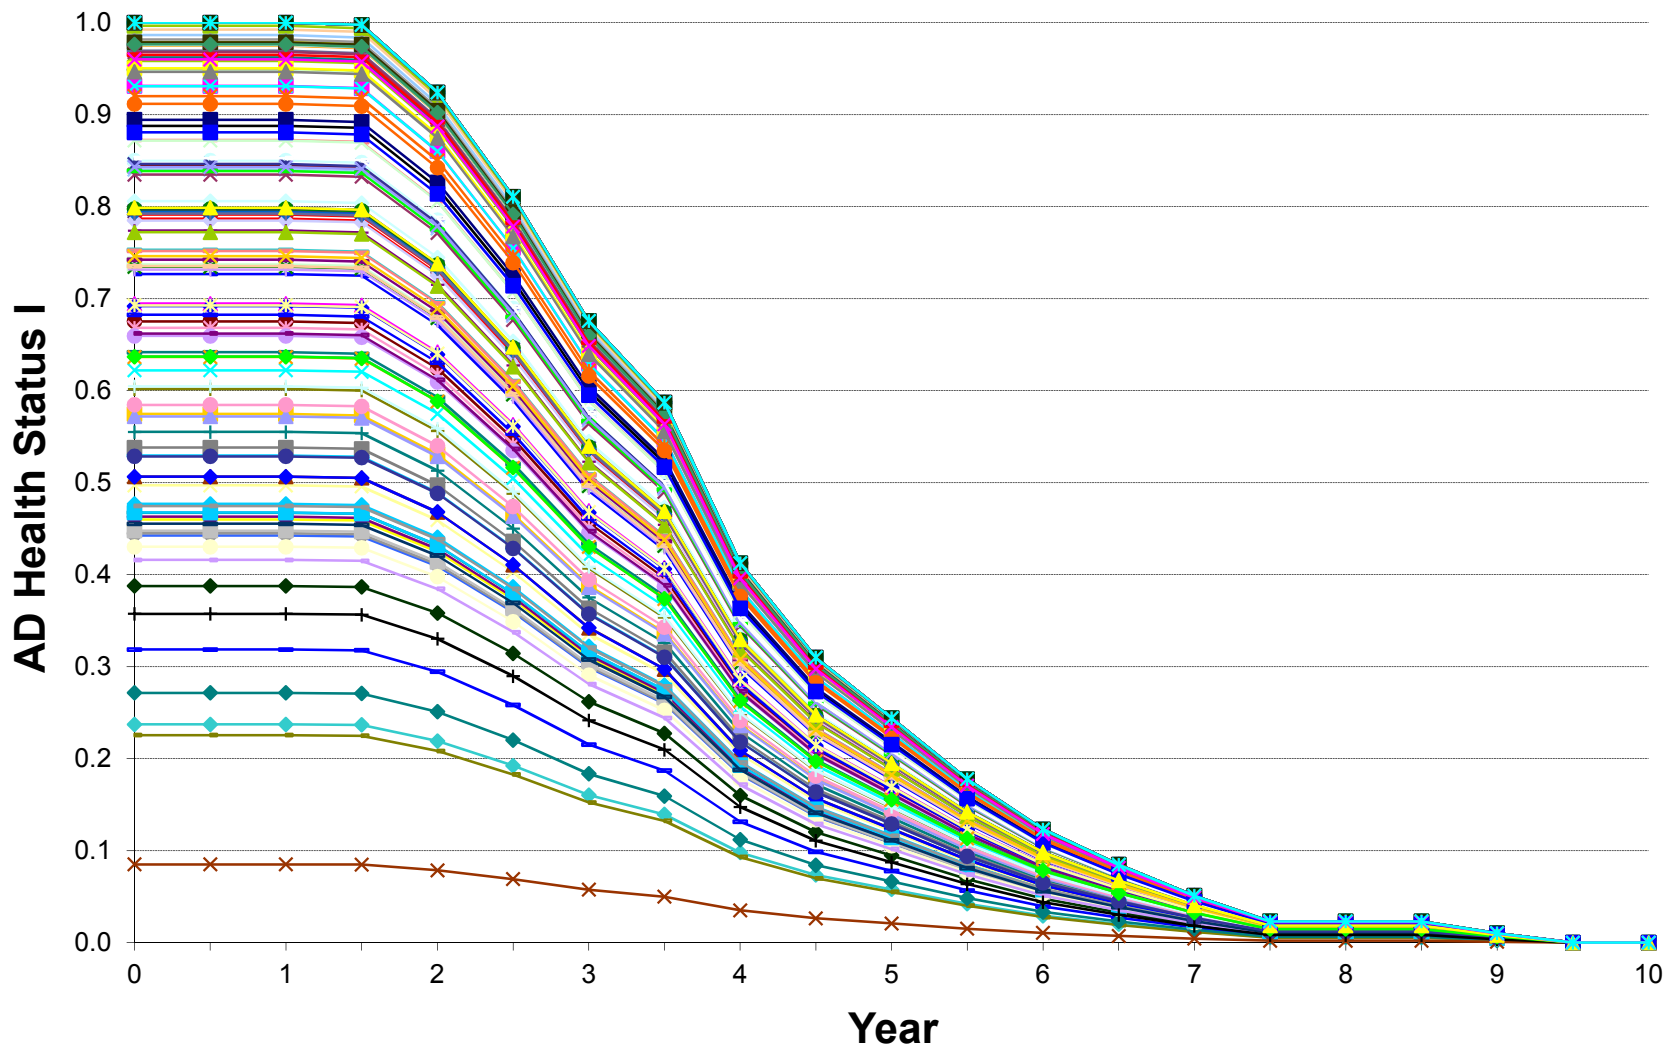

**Web Figure 4 Individual Trajectories of AD Progression in the Predictors 1 Data, 3-D Model, 103 Males**

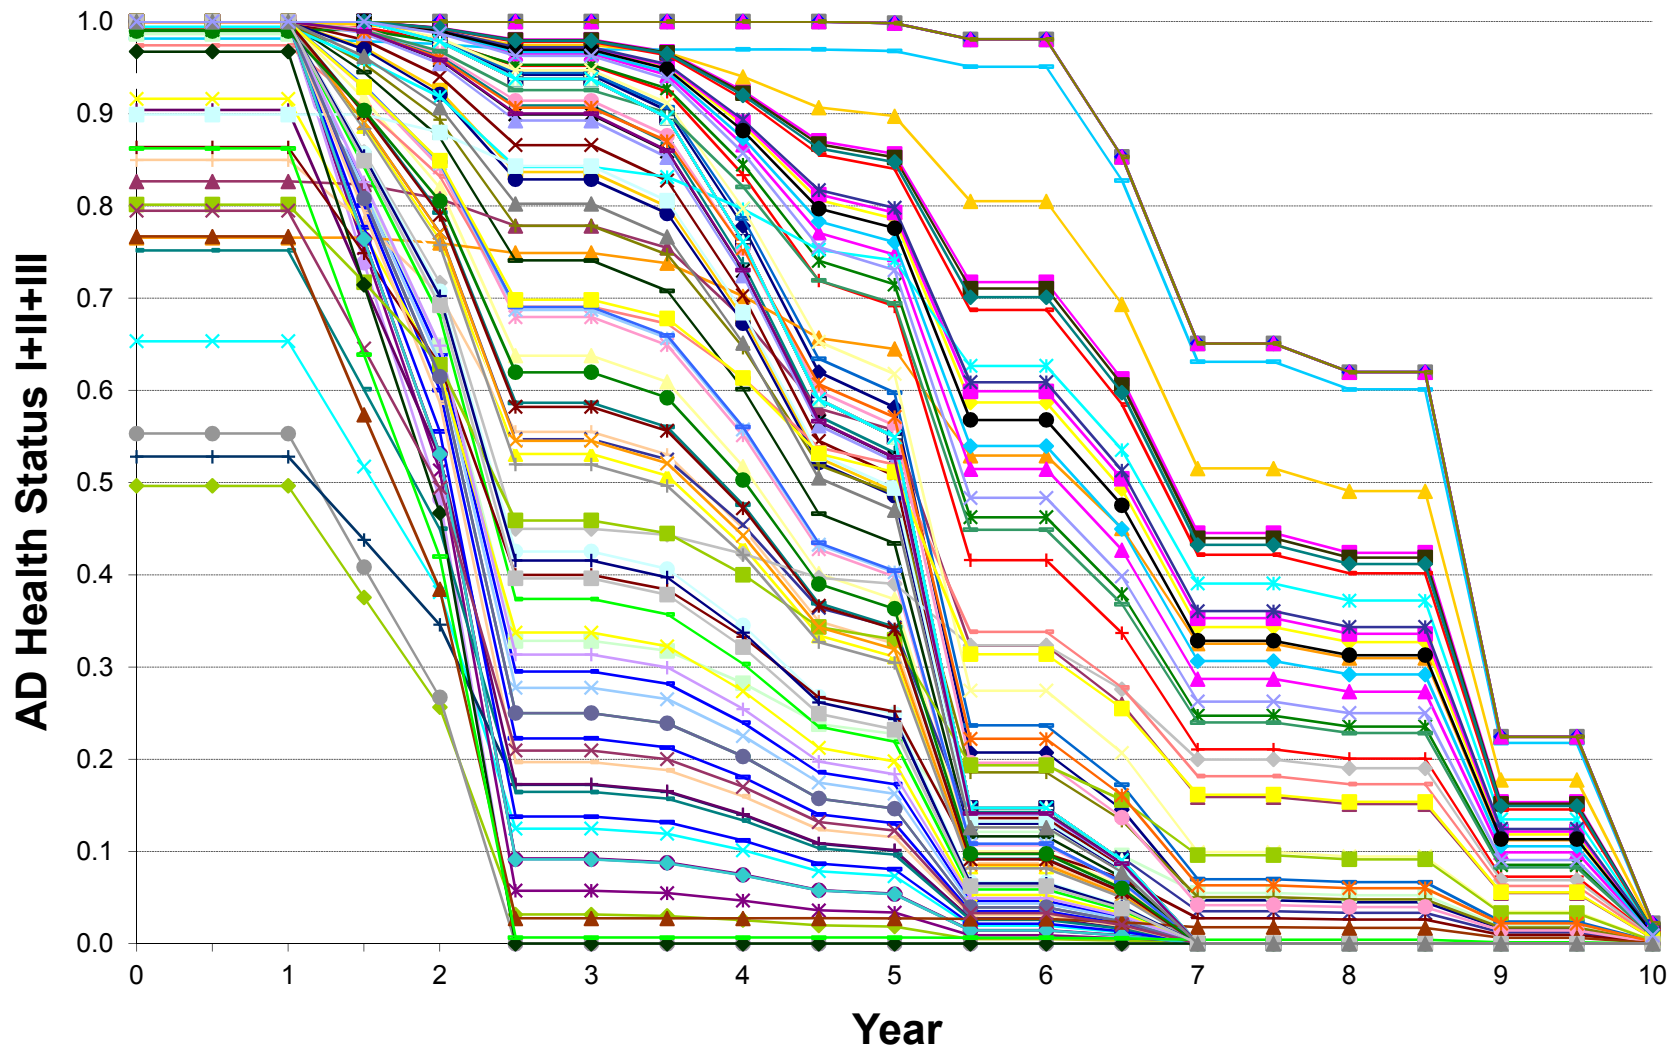

**Web Figure 5 Individual Trajectories of AD Progression in the Predictors 1 Data, 3-D Model, 149 Females**

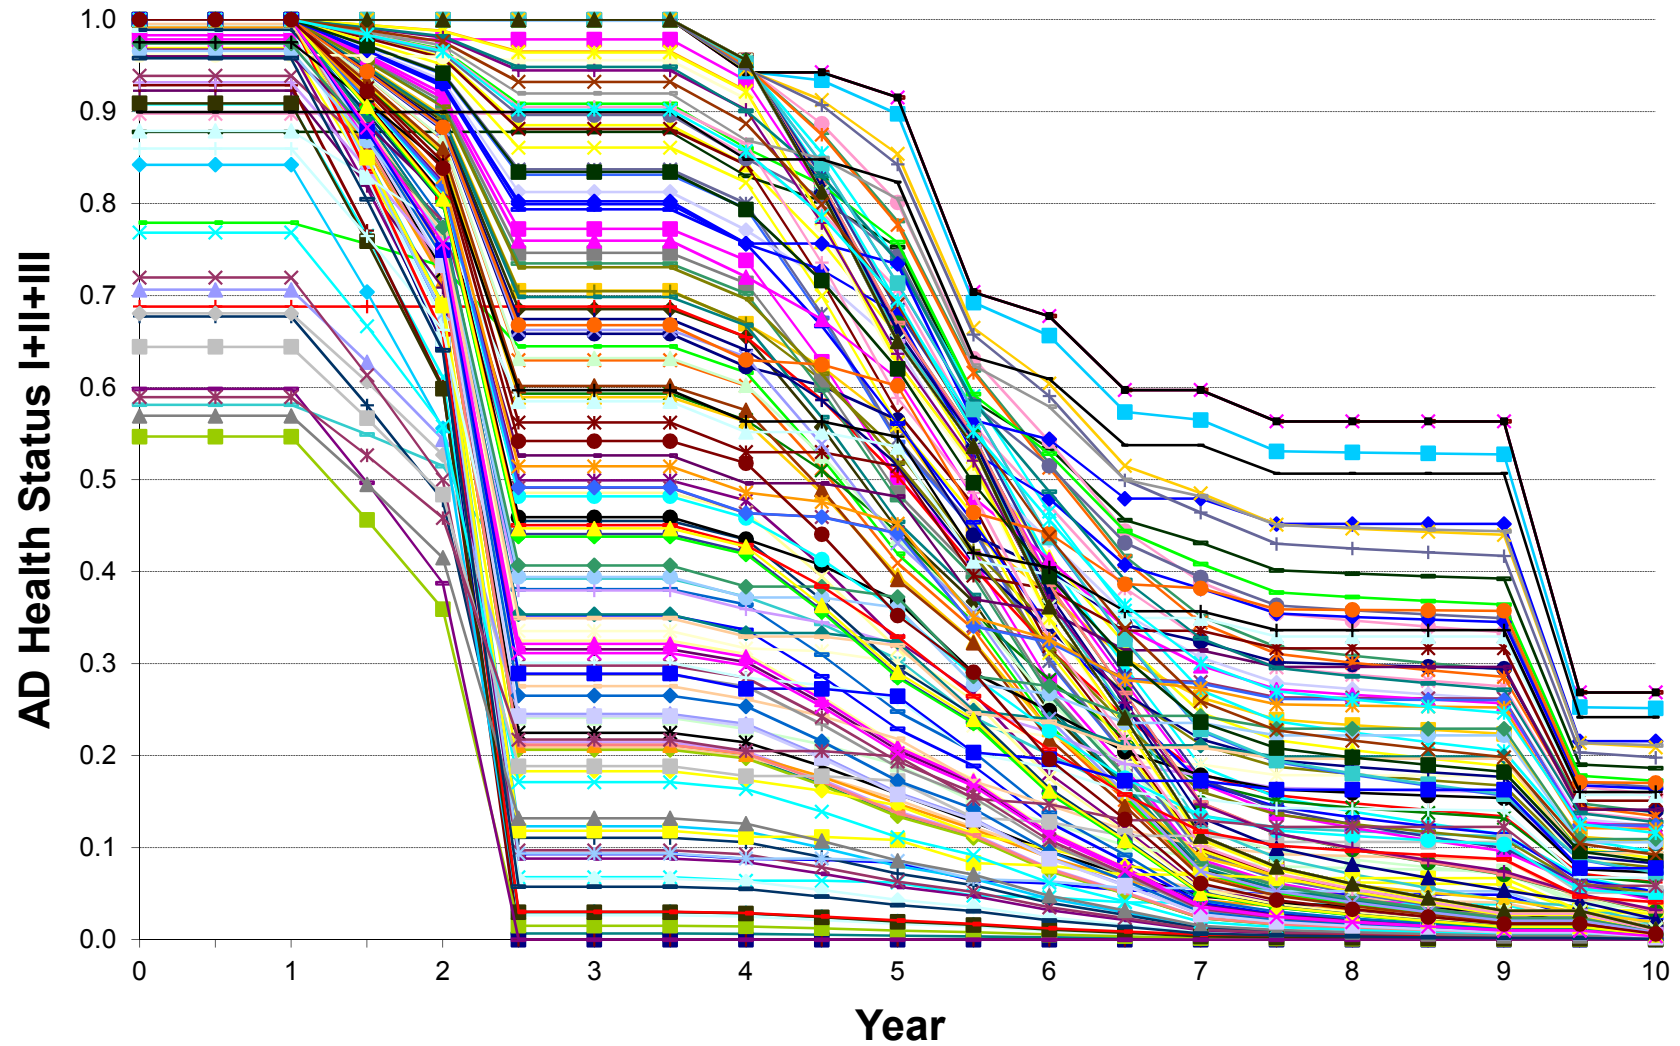

#### Header for Tables A1–A7

**WebTables A1-A7 are supplementary tables with detailed statistical tests and extensive sets of parameter estimates that can be provided online in a web-only format for interested readers, at <http://mdm.sagepub.com/>.**

**These tables are referenced in the 4–7th footnotes of the main text.**

Web Table A1: Model Selection Criteria for Sex-Specific Analyses of Predictors 1 Data

| D              | K | I   | J  | M   | M-J | df    | N*  | N**   | ln(N*) | ln(N**) | Log-Likelihood | Model Selection Criterion |                   |                   |                   | Deviation from Minimum Value of Criterion |             |             |             |
|----------------|---|-----|----|-----|-----|-------|-----|-------|--------|---------|----------------|---------------------------|-------------------|-------------------|-------------------|-------------------------------------------|-------------|-------------|-------------|
|                |   |     |    |     |     |       |     |       |        |         |                | AIC                       | BIC1              | BIC2              | CAIC              | ΔAIC                                      | ΔBIC1       | ΔBIC2       | ΔCAIC       |
| <b>Males</b>   |   |     |    |     |     |       |     |       |        |         |                |                           |                   |                   |                   |                                           |             |             |             |
| 0              | 1 | 103 | 80 | 248 | 168 | 168   | 632 | 632   | 6.45   | 6.45    | -43,414.82     | 87,165.64                 | 87,912.94         | 87,912.94         | 88,080.94         | 18,268.48                                 | 14,118.31   | 13,839.03   | 13,185.31   |
| 1              | 2 | 103 | 80 | 248 | 168 | 459   | 632 | 683   | 6.45   | 6.53    | -37,722.05     | 76,362.11                 | 78,403.83         | 78,439.78         | 78,862.83         | 7,464.95                                  | 4,609.20    | 4,365.88    | 3,967.20    |
| 2              | 3 | 103 | 80 | 248 | 168 | 770   | 632 | 747   | 6.45   | 6.62    | -35,073.61     | 71,687.21                 | 75,112.34         | 75,241.38         | 75,882.34         | 2,790.06                                  | 1,317.70    | 1,167.47    | 986.70      |
| 3              | 4 | 103 | 80 | 248 | 168 | 1,101 | 632 | 814   | 6.45   | 6.70    | -33,347.58     | <b>68,897.15</b>          | <b>73,794.63</b>  | <b>74,073.91</b>  | <b>74,895.63</b>  | <b>0.00</b>                               | <b>0.00</b> | <b>0.00</b> | <b>0.00</b> |
| <b>Females</b> |   |     |    |     |     |       |     |       |        |         |                |                           |                   |                   |                   |                                           |             |             |             |
| 0              | 1 | 149 | 79 | 248 | 169 | 169   | 991 | 991   | 6.90   | 6.90    | -64,293.37     | 128,924.74                | 129,752.65        | 129,752.65        | 129,921.65        | 26,331.52                                 | 21,070.15   | 20,980.33   | 19,996.15   |
| 1              | 2 | 149 | 79 | 248 | 169 | 507   | 991 | 933   | 6.90   | 6.84    | -55,171.08     | 111,356.17                | 113,839.89        | 113,809.28        | 114,346.89        | 8,762.95                                  | 5,157.39    | 5,036.97    | 4,421.39    |
| 2              | 3 | 149 | 79 | 248 | 169 | 865   | 991 | 990   | 6.90   | 6.90    | -51,828.33     | 105,386.67                | 109,624.18        | 109,623.51        | 110,489.18        | 2,793.45                                  | 941.68      | 851.20      | 563.68      |
| 3              | 4 | 149 | 79 | 248 | 169 | 1,243 | 991 | 1,065 | 6.90   | 6.97    | -50,053.61     | <b>102,593.22</b>         | <b>108,682.50</b> | <b>108,772.32</b> | <b>109,925.50</b> | <b>0.00</b>                               | <b>0.00</b> | <b>0.00</b> | <b>0.00</b> |

**Notes**

$df = I \times D + K \times (M - J) + T \times D \times K / 2$ , where  $T \equiv \max(t) = 20$ , is the time index for the last follow-up examination.

$N^*$  is the  $df$ -weighted geometric mean number of responses to the  $J$  variables.

$N^{**}$  is the geometric mean number of additive terms in the formulas for the  $df$  diagonal elements of the  $df \times df$  Hessian matrix of the Log-Likelihood function.

AIC =  $-2 \times \text{Log-Likelihood} + 2 \times df$ ; see Akaike (1973).

BIC1 =  $-2 \times \text{Log-Likelihood} + df \times \ln(N^*)$ ; see Schwarz (1978).

BIC2 =  $-2 \times \text{Log-Likelihood} + df \times \ln(N^{**})$ ; see Raftery (1995).

CAIC =  $-2 \times \text{Log-Likelihood} + df \times \ln(N^*) + df$ ; CAIC is a mnemonic for "consistent" AIC – see Bozdogan (1987).

For each selection criterion, the best model has the minimum value, shown in boldface.



Web Table A2:  $\Delta BIC_j$  Statistics and Their Rankings by Variable for the Sex-Specific 1-D and 3-D Models for the Predictors 1 Data

| <i>j</i> Variable Name/Description                                     | Males    |              |                    |           |                    |           | Females  |              |                    |           |                    |           |
|------------------------------------------------------------------------|----------|--------------|--------------------|-----------|--------------------|-----------|----------|--------------|--------------------|-----------|--------------------|-----------|
|                                                                        | <i>L</i> | <i>N</i>     | $\Delta BIC_j$ 0-1 | Rank      | $\Delta BIC_j$ 0-3 | Rank      | <i>L</i> | <i>N</i>     | $\Delta BIC_j$ 0-1 | Rank      | $\Delta BIC_j$ 0-3 | Rank      |
| <b>1 Prospective 6-month survival</b>                                  | <b>2</b> | <b>1,085</b> | <b>12.95</b>       | <b>46</b> | <b>17.04</b>       | <b>52</b> | <b>2</b> | <b>1,673</b> | <b>20.60</b>       | <b>48</b> | <b>27.83</b>       | <b>51</b> |
| 2 Retrospective 6-month survival                                       | 2        | 1,043        | 6.68               | 52        | 10.62              | 55        | 2        | 1,609        | 19.42              | 49        | 20.77              | 54        |
| 3 Age-group at Intake:                                                 | 6        | 1,146        | 5.19               | 55        | 55.46              | 39        | 6        | 1,758        | -12.14             | 77        | 799.11             | 16        |
| 4 B04: Ethnic Group                                                    | 2        | 1,146        | -0.59              | 63        | -19.62             | 73        | 3        | 1,758        | -2.50              | 58        | 11.78              | 56        |
| 5 B05: Hispanic                                                        | 3        | 1,146        | -3.63              | 67        | -24.56             | 78        | 5        | 1,758        | 15.03              | 52        | -2.06              | 62        |
| 6 B06: Highest Grade                                                   | 3        | 1,132        | 8.94               | 50        | -7.55              | 61        | 3        | 1,758        | -12.87             | 78        | 108.34             | 38        |
| 7 B07: Birth Place                                                     | 3        | 1,141        | -11.03             | 79        | -23.12             | 76        | 4        | 1,750        | 22.45              | 47        | 222.98             | 32        |
| 8 B08: State of Birth                                                  | 3        | 964          | 0.57               | 60        | -20.03             | 74        | 3        | 1,554        | -6.36              | 68        | 73.38              | 43        |
| 9 B09: Citizen of US                                                   | 2        | 1,121        | 0.74               | 58        | 19.07              | 51        | 2        | 1,696        | 1.48               | 57        | -13.26             | 66        |
| 10 B12: Predominant Language                                           | 3        | 1,146        | 0.65               | 59        | 24.02              | 45        | 2        | 1,758        | -7.39              | 74        | -9.68              | 65        |
| 11 B13: How Well Is English Spoken                                     | 3        | 1,146        | 12.46              | 47        | 21.91              | 49        | 2        | 1,758        | 18.79              | 50        | 0.49               | 60        |
| 12 B14: Occupation                                                     | 7        | 1,146        | 59.67              | 36        | 22.27              | 47        | 8        | 1,758        | -37.39             | 79        | 183.15             | 35        |
| 13 XX01: Cause of Death                                                | 6        | 41           | -10.46             | 78        | -29.08             | 80        | 6        | 48           | -10.31             | 76        | -44.80             | 79        |
| 14 XX03: Autopsy                                                       | 4        | 52           | -10.37             | 77        | -26.48             | 79        | 3        | 61           | -7.35              | 73        | -14.90             | 68        |
| 15 Periods since first time sought help: RECODE                        | 5        | 1,085        | 439.30             | 8         | 644.72             | 11        | 5        | 1,544        | 935.47             | 2         | 927.81             | 10        |
| 16 PP43: Wandered Away                                                 | 2        | 919          | -1.28              | 64        | 23.99              | 46        | 2        | 1,405        | 15.51              | 51        | 21.92              | 53        |
| 17 PP44: Verbal Outbursts                                              | 2        | 919          | 13.51              | 45        | 14.60              | 53        | 2        | 1,405        | 66.15              | 34        | 86.31              | 41        |
| 18 PP45: Physical Threats                                              | 3        | 919          | 83.41              | 32        | 83.29              | 35        | 3        | 1,405        | 47.16              | 39        | 63.50              | 45        |
| 19 PP50: Difficulty Sleeping                                           | 2        | 919          | 0.15               | 61        | -7.11              | 60        | 2        | 1,404        | -4.93              | 65        | -21.37             | 74        |
| 20 PP51: How Much Sleep?                                               | 4        | 260          | -12.85             | 80        | -14.46             | 65        | 4        | 294          | 5.36               | 55        | -24.46             | 75        |
| <b>21 Overall mMMS GATE</b>                                            | <b>2</b> | <b>1,146</b> | <b>182.09</b>      | <b>26</b> | <b>270.92</b>      | <b>28</b> | <b>2</b> | <b>1,758</b> | <b>304.21</b>      | <b>26</b> | <b>416.21</b>      | <b>29</b> |
| <b>22 SS01: Total mMMS Score: RECODE</b>                               | <b>4</b> | <b>732</b>   | <b>266.02</b>      | <b>19</b> | <b>528.27</b>      | <b>16</b> | <b>4</b> | <b>1,088</b> | <b>490.86</b>      | <b>16</b> | <b>825.18</b>      | <b>14</b> |
| 23 SS02: mMMS - Orientation: RECODE                                    | 3        | 736          | 228.88             | 22        | 481.04             | 18        | 3        | 1,099        | 383.26             | 21        | 599.84             | 19        |
| 24 SS03: mMMS - Registration                                           | 4        | 736          | 148.43             | 28        | 280.74             | 27        | 4        | 1,099        | 200.70             | 29        | 311.43             | 30        |
| 25 SS07: mMMS - Attention/Calculation: serial 7s, WORLD, Add coins     | 8        | 734          | 126.08             | 30        | 239.90             | 30        | 8        | 1,096        | 252.64             | 28        | 466.02             | 27        |
| 26 SS09: mMMS - Recall: 3-word memory                                  | 4        | 735          | -0.50              | 62        | 70.92              | 37        | 4        | 1,099        | 26.14              | 45        | 28.68              | 50        |
| 27 SS11: mMMS - repeat 2 phrases, 3-stage cmd., read/obey, write sent. | 8        | 734          | 207.08             | 23        | 373.20             | 23        | 8        | 1,092        | 345.57             | 23        | 552.55             | 22        |
| 28 SS12: mMMS - Construction: circle, diamond, cube                    | 3        | 733          | 134.06             | 29        | 297.50             | 26        | 3        | 1,090        | 123.04             | 33        | 293.41             | 31        |
| <b>29 CC08: Living Status</b>                                          | <b>6</b> | <b>919</b>   | <b>312.81</b>      | <b>17</b> | <b>469.04</b>      | <b>19</b> | <b>6</b> | <b>1,418</b> | <b>387.50</b>      | <b>20</b> | <b>549.49</b>      | <b>23</b> |
| 30 Periods since entered nursing home: RECODE                          | 5        | 224          | 20.34              | 40        | -20.19             | 75        | 5        | 481          | 54.22              | 37        | 8.62               | 57        |
| 31 NN01: Patient Trouble With Chores                                   | 3        | 919          | 230.71             | 20        | 375.41             | 22        | 3        | 1,416        | 391.56             | 19        | 552.99             | 21        |
| 32 NN02: Patient Trouble Handling Money                                | 3        | 919          | 230.69             | 21        | 425.67             | 21        | 3        | 1,416        | 419.23             | 17        | 532.52             | 24        |
| 33 NN03: Patient Trouble Remembering Lists                             | 3        | 919          | 70.07              | 34        | 117.54             | 34        | 3        | 1,416        | 132.94             | 32        | 198.59             | 33        |
| 34 NN04: Patient Trouble Around House                                  | 3        | 918          | 442.45             | 5         | 724.38             | 4         | 3        | 1,416        | 810.17             | 5         | 994.48             | 7         |
| 35 NN05: Patient Trouble Around Neighborhood                           | 3        | 918          | 436.62             | 9         | 621.35             | 13        | 3        | 1,416        | 683.40             | 11        | 863.88             | 13        |
| 36 NN06: Patient Trouble Recognizing Place                             | 3        | 919          | 397.93             | 11        | 637.06             | 12        | 3        | 1,416        | 737.27             | 7         | 920.73             | 11        |
| 37 NN07: Patient Trouble Remembering Things                            | 3        | 919          | 78.35              | 33        | 136.78             | 33        | 3        | 1,416        | 143.38             | 30        | 179.77             | 36        |
| 38 NN08: Patient Dwell in the Past                                     | 3        | 917          | 28.98              | 38        | 50.60              | 41        | 3        | 1,415        | 55.40              | 36        | 70.11              | 44        |
| 39 NN09: Patient Eating                                                | 4        | 919          | 336.15             | 16        | 564.63             | 15        | 4        | 1,418        | 527.80             | 15        | 782.06             | 17        |
| 40 NN10: Patient Dressing                                              | 4        | 919          | 484.95             | 2         | 832.35             | 2         | 4        | 1,418        | 800.71             | 6         | 1,145.59           | 2         |
| 41 NN11: Patient Bladder and Bowel Control                             | 4        | 919          | 369.41             | 13        | 648.54             | 10        | 4        | 1,418        | 694.63             | 10        | 930.83             | 9         |
| 42 RR01: Needs Reminders                                               | 3        | 918          | 34.03              | 37        | 64.23              | 38        | 3        | 1,418        | 63.06              | 35        | 95.17              | 39        |
| 43 RR02: Needs Help to Remember                                        | 3        | 919          | 11.14              | 48        | 34.39              | 43        | 3        | 1,418        | 48.07              | 38        | 76.96              | 42        |
| 44 RR03: Needs Help Finding Things                                     | 2        | 919          | 7.87               | 51        | 27.59              | 44        | 2        | 1,418        | 23.71              | 46        | 40.99              | 46        |
| 45 RR04: Needs Household Chores Done                                   | 2        | 918          | 184.67             | 25        | 315.43             | 25        | 2        | 1,418        | 266.48             | 27        | 504.90             | 26        |
| 46 RR05: Needs Watching When Awake                                     | 2        | 919          | 292.19             | 18        | 452.11             | 20        | 2        | 1,419        | 329.98             | 24        | 529.54             | 25        |
| 47 RR06: Needs to be Escorted When Outside                             | 2        | 919          | 372.30             | 12        | 520.51             | 17        | 2        | 1,418        | 407.22             | 18        | 673.48             | 18        |

|                                                         |          |            |               |           |               |           |          |              |               |           |                 |           |
|---------------------------------------------------------|----------|------------|---------------|-----------|---------------|-----------|----------|--------------|---------------|-----------|-----------------|-----------|
| 48 RR07: Needs to be Accompanied                        | 2        | 919        | 552.55        | 1         | 684.86        | 7         | 2        | 1,419        | 643.29        | 13        | 873.07          | 12        |
| 49 RR08: Needs to be Dressed/Washed/Groomed             | 2        | 919        | 439.47        | 7         | 687.12        | 6         | 2        | 1,419        | 843.74        | 4         | 996.30          | 5         |
| 50 RR09: Needs to be Taken to Toilet                    | 2        | 919        | 363.34        | 14        | 654.51        | 8         | 2        | 1,419        | 722.34        | 8         | 994.54          | 6         |
| 51 RR10: Needs to be Fed                                | 2        | 919        | 197.54        | 24        | 349.86        | 24        | 2        | 1,419        | 380.82        | 22        | 569.43          | 20        |
| 52 RR11: Needs to be Turned/Moved/Transferred           | 2        | 919        | 158.57        | 27        | 267.60        | 29        | 2        | 1,419        | 320.13        | 25        | 465.84          | 28        |
| 53 RR12: Needs to Wear Diaper/Catheter                  | 2        | 919        | 352.94        | 15        | 649.00        | 9         | 2        | 1,419        | 563.40        | 14        | 803.70          | 15        |
| 54 RR13: Needs to be Tube Fed                           | 2        | 919        | 13.71         | 44        | 13.90         | 54        | 2        | 1,419        | 26.81         | 44        | 29.76           | 49        |
| <b>55 RR14: Dependence Level</b>                        | <b>6</b> | <b>919</b> | <b>474.29</b> | <b>3</b>  | <b>881.54</b> | <b>1</b>  | <b>6</b> | <b>1,419</b> | <b>871.21</b> | <b>3</b>  | <b>1,342.45</b> | <b>1</b>  |
| <b>56 RR15: Equivalent Institutional Service</b>        | <b>3</b> | <b>919</b> | <b>469.07</b> | <b>4</b>  | <b>746.19</b> | <b>3</b>  | <b>3</b> | <b>1,415</b> | <b>658.93</b> | <b>12</b> | <b>1,070.89</b> | <b>3</b>  |
| 57 Neurologist Estimation of Illness (No. of INTERVALS) | 5        | 1,073      | 440.82        | 6         | 575.58        | 14        | 5        | 1,648        | 946.09        | 1         | 997.37          | 4         |
| 58 KK16: Had Seizure?                                   | 2        | 870        | -3.48         | 66        | -16.03        | 67        | 2        | 1,351        | 10.37         | 53        | 1.51            | 58        |
| 59 KK17: First Time Seizure?                            | 2        | 18         | -2.15         | 65        | -7.76         | 62        | 2        | 41           | -3.38         | 60        | -6.74           | 63        |
| 60 Periods since seizures began: RECODE                 | 4        | 81         | -7.63         | 76        | -23.27        | 77        | 4        | 166          | -4.63         | 62        | -30.86          | 77        |
| 61 KK19: How Frequently Do Seizures Occur?              | 4        | 16         | -6.89         | 75        | -17.94        | 68        | 4        | 30           | -4.84         | 64        | -24.68          | 76        |
| 62 FF10: Adequate Sight?                                | 2        | 368        | 5.95          | 54        | 3.23          | 57        | 2        | 461          | -6.13         | 67        | -8.56           | 64        |
| 63 JJ17A: Beer/Week: RECODE                             | 3        | 857        | 10.95         | 49        | -3.78         | 59        | 3        | 1,347        | -8.65         | 75        | -33.12          | 78        |
| 64 JJ17B: Wine/Week: RECODE                             | 3        | 853        | 14.66         | 43        | 53.22         | 40        | 3        | 1,347        | 9.84          | 54        | 15.31           | 55        |
| 65 JJ17C: Hard Liquor/Week: RECODE                      | 3        | 854        | 18.13         | 42        | 19.26         | 50        | 3        | 1,347        | 27.22         | 43        | 35.15           | 48        |
| 66 JJ17D: All Alcoholic Drinks/Week: RECODE             | 3        | 859        | 61.59         | 35        | 76.82         | 36        | 3        | 1,356        | 43.71         | 41        | 87.00           | 40        |
| 67 EF1: Hypertension                                    | 2        | 781        | -5.34         | 69        | -15.45        | 66        | 2        | 1,224        | -6.95         | 72        | -14.85          | 67        |
| 68 EF2: Diabetes                                        | 2        | 782        | -5.25         | 68        | -18.30        | 70        | 2        | 1,228        | -6.57         | 69        | -16.61          | 71        |
| 69 EF3: Myocardial Infarction                           | 2        | 782        | -5.90         | 72        | -18.21        | 69        | -        | -            | -             | -         | -               | -         |
| 70 EF4: Heart Disease                                   | 2        | 782        | -5.43         | 70        | -18.73        | 71        | 2        | 1,227        | -3.46         | 61        | -15.79          | 69        |
| 71 EF5: Stroke                                          | 2        | 590        | -6.33         | 73        | -13.16        | 64        | 2        | 878          | -4.95         | 66        | -16.33          | 70        |
| 72 EF5A: TIA                                            | 2        | 34         | 6.41          | 53        | 6.52          | 56        | 2        | 46           | 4.34          | 56        | 0.19            | 61        |
| 73 EF6: Surgery                                         | 2        | 780        | -5.86         | 71        | -18.98        | 72        | 2        | 1,225        | -6.80         | 70        | -19.47          | 73        |
| 74 EF7: Admission to Hospital                           | 2        | 784        | 1.37          | 56        | -9.93         | 63        | 2        | 1,232        | -4.71         | 63        | -17.16          | 72        |
| 75 EF8: Other Treatment                                 | 2        | 782        | 23.46         | 39        | 22.02         | 48        | 2        | 1,219        | 33.40         | 42        | 21.96           | 52        |
| <b>76 NNTOT: Total dependence scale score: RECODE</b>   | <b>4</b> | <b>915</b> | <b>401.22</b> | <b>10</b> | <b>708.70</b> | <b>5</b>  | <b>4</b> | <b>1,414</b> | <b>696.28</b> | <b>9</b>  | <b>973.40</b>   | <b>8</b>  |
| <b>77 DELUSION: Delusions</b>                           | <b>2</b> | <b>915</b> | <b>18.90</b>  | <b>41</b> | <b>175.80</b> | <b>31</b> | <b>2</b> | <b>1,395</b> | <b>44.39</b>  | <b>40</b> | <b>119.70</b>   | <b>37</b> |
| <b>78 HALLUCIN: Hallucinations</b>                      | <b>2</b> | <b>915</b> | <b>1.04</b>   | <b>57</b> | <b>35.13</b>  | <b>42</b> | <b>2</b> | <b>1,395</b> | <b>-6.87</b>  | <b>71</b> | <b>36.68</b>    | <b>47</b> |
| 79 ILLUSION: Illusions                                  | 2        | 915        | -6.65         | 74        | -1.22         | 58        | 2        | 1,394        | -3.00         | 59        | 1.08            | 59        |
| <b>80 EPSXS: Moderate extrapyramidal symptoms</b>       | <b>2</b> | <b>589</b> | <b>109.37</b> | <b>31</b> | <b>151.61</b> | <b>32</b> | <b>2</b> | <b>933</b>   | <b>133.97</b> | <b>31</b> | <b>189.81</b>   | <b>34</b> |
| Total                                                   | 248      | 65,988     | 10,302.23     |           | 16,884.59     |           | 248      | 100,235      | 17,078.67     |           | 24,981.80       |           |

**Note:** Boldface font indicates variables detailed in Tables 1 and 2.

Web Table A3: Response Probabilities by Pure Type for the 3-Dimensional Model of AD Progression in the Predictors 1 Data, Males

| j     | Variable                        | Response                 | No. of |          | Pure Type |       |       |       | ΔBIC <sub>j</sub> 0-3 | Rank   |    |
|-------|---------------------------------|--------------------------|--------|----------|-----------|-------|-------|-------|-----------------------|--------|----|
|       |                                 |                          | Obs.   | Observed | Predicted | I     | II    | III   |                       |        | IV |
| 1     | Prospective 6-month survival    | Died                     | 70     | 0.065    | 0.064     | 0.009 | 0.018 | 0.038 | 0.152                 | 17.04  | 52 |
|       |                                 | Survived                 | 1,015  | 0.935    | 0.936     | 0.991 | 0.982 | 0.962 | 0.848                 |        |    |
| 2     | Retrospective 6-month survival  | Dead                     | 58     | 0.056    | 0.055     | 0.000 | 0.024 | 0.019 | 0.127                 | 10.62  | 55 |
|       |                                 | Alive                    | 985    | 0.944    | 0.945     | 1.000 | 0.976 | 0.981 | 0.873                 |        |    |
| 3     | Age-group at Intake:            | 1=<65                    | 277    | 0.242    | 0.243     | 0.000 | 0.350 | 0.303 | 0.259                 | 55.46  | 39 |
|       |                                 | 2=65-69                  | 212    | 0.185    | 0.185     | 0.225 | 0.144 | 0.177 | 0.195                 |        |    |
|       |                                 | 2=70-74                  | 255    | 0.223    | 0.221     | 0.428 | 0.164 | 0.088 | 0.253                 |        |    |
|       |                                 | 2=75-79                  | 246    | 0.215    | 0.214     | 0.336 | 0.241 | 0.208 | 0.133                 |        |    |
|       |                                 | 2=80-84                  | 130    | 0.113    | 0.114     | 0.000 | 0.101 | 0.180 | 0.132                 |        |    |
|       |                                 | 6=85+                    | 26     | 0.023    | 0.023     | 0.010 | 0.000 | 0.043 | 0.028                 |        |    |
| 4     | B04: Ethnic Group               | White                    | 1,107  | 0.966    | 0.966     | 0.962 | 0.954 | 0.972 | 0.971                 | -19.62 | 73 |
|       |                                 | Black                    | 39     | 0.034    | 0.034     | 0.038 | 0.046 | 0.028 | 0.029                 |        |    |
|       |                                 | Other                    | 0      | 0.000    | 0.000     | 0.000 | 0.000 | 0.000 | 0.000                 |        |    |
| 5     | B05: Hispanic                   | Not Hispanic             | 1,125  | 0.982    | 0.982     | 1.000 | 0.980 | 0.949 | 1.000                 | -24.56 | 78 |
|       |                                 | Mexican/Mex-Amer/Chicano | 0      | 0.000    | 0.000     | 0.000 | 0.000 | 0.000 | 0.000                 |        |    |
|       |                                 | Puerto Rican             | 9      | 0.008    | 0.008     | 0.000 | 0.000 | 0.029 | 0.000                 |        |    |
|       |                                 | Cuban                    | 12     | 0.010    | 0.010     | 0.000 | 0.020 | 0.023 | 0.000                 |        |    |
|       |                                 | Dominican                | 0      | 0.000    | 0.000     | 0.000 | 0.000 | 0.000 | 0.000                 |        |    |
| Other | 0                               | 0.000                    | 0.000  | 0.000    | 0.000     | 0.000 | 0.000 |       |                       |        |    |
| 6     | B06: Highest Grade              | 0-8                      | 36     | 0.032    | 0.032     | 0.000 | 0.054 | 0.050 | 0.020                 | -7.55  | 61 |
|       |                                 | 9-12                     | 423    | 0.374    | 0.375     | 0.237 | 0.376 | 0.356 | 0.462                 |        |    |
|       |                                 | >12                      | 673    | 0.595    | 0.593     | 0.763 | 0.570 | 0.594 | 0.518                 |        |    |
| 7     | B07: Birth Place                | United States            | 964    | 0.845    | 0.845     | 0.754 | 0.890 | 0.856 | 0.857                 | -23.12 | 76 |
|       |                                 | Puerto Rico              | 9      | 0.008    | 0.008     | 0.000 | 0.000 | 0.029 | 0.000                 |        |    |
|       |                                 | Dominican Rep.           | 0      | 0.000    | 0.000     | 0.000 | 0.000 | 0.000 | 0.000                 |        |    |
|       |                                 | Other                    | 168    | 0.147    | 0.147     | 0.246 | 0.110 | 0.115 | 0.143                 |        |    |
| 8     | B08: State of Birth             | New York                 | 181    | 0.188    | 0.188     | 0.144 | 0.216 | 0.203 | 0.181                 | -20.03 | 74 |
|       |                                 | New Jersey               | 113    | 0.117    | 0.116     | 0.267 | 0.084 | 0.111 | 0.062                 |        |    |
|       |                                 | Other                    | 670    | 0.695    | 0.696     | 0.589 | 0.700 | 0.686 | 0.757                 |        |    |
| 9     | B09: Citizen of US              | No                       | 12     | 0.011    | 0.011     | 0.059 | 0.000 | 0.000 | 0.000                 | 19.07  | 51 |
|       |                                 | Yes                      | 1,109  | 0.989    | 0.989     | 0.941 | 1.000 | 1.000 | 1.000                 |        |    |
| 10    | B12: Predominant Language       | English                  | 1,114  | 0.972    | 0.972     | 0.890 | 1.000 | 0.971 | 1.000                 | 24.02  | 45 |
|       |                                 | Spanish                  | 9      | 0.008    | 0.008     | 0.000 | 0.000 | 0.029 | 0.000                 |        |    |
|       |                                 | Other                    | 23     | 0.020    | 0.020     | 0.110 | 0.000 | 0.000 | 0.000                 |        |    |
| 11    | B13: How Well Is English Spoken | Very Well                | 1,073  | 0.936    | 0.936     | 0.805 | 0.979 | 0.922 | 0.992                 | 21.91  | 49 |
|       |                                 | Well                     | 65     | 0.057    | 0.057     | 0.195 | 0.021 | 0.062 | 0.000                 |        |    |
|       |                                 | Not Well                 | 8      | 0.007    | 0.007     | 0.000 | 0.000 | 0.016 | 0.008                 |        |    |
| 12    | B14: Occupation                 | Housewife                | 12     | 0.010    | 0.010     | 0.056 | 0.000 | 0.000 | 0.000                 | 22.27  | 47 |
|       |                                 | Housewife and Other      | 0      | 0.000    | 0.000     | 0.000 | 0.000 | 0.000 | 0.000                 |        |    |
|       |                                 | Unskilled/Semi_Skilled   | 70     | 0.061    | 0.061     | 0.065 | 0.051 | 0.045 | 0.080                 |        |    |
|       |                                 | Skilled Trade            | 272    | 0.237    | 0.239     | 0.162 | 0.144 | 0.240 | 0.341                 |        |    |
|       |                                 | Clerical/Office          | 63     | 0.055    | 0.056     | 0.000 | 0.100 | 0.010 | 0.096                 |        |    |
|       |                                 | Manager Bus./Govt.       | 219    | 0.191    | 0.189     | 0.243 | 0.226 | 0.265 | 0.074                 |        |    |
|       |                                 | Professional             | 426    | 0.372    | 0.372     | 0.346 | 0.381 | 0.339 | 0.409                 |        |    |
|       |                                 | Other                    | 84     | 0.073    | 0.072     | 0.129 | 0.097 | 0.102 | 0.000                 |        |    |
| 13    | XX01: Cause of Death            | Pneumonia                | 18     | 0.439    | 0.452     | 0.000 | 0.000 | 0.745 | 0.465                 | -29.08 | 80 |
|       |                                 | Other Infection          | 4      | 0.098    | 0.101     | 0.000 | 0.000 | 0.000 | 0.201                 |        |    |
|       |                                 | Cardiovascular           | 7      | 0.171    | 0.162     | 0.000 | 0.384 | 0.156 | 0.142                 |        |    |
|       |                                 | Cerebrovascular          | 4      | 0.098    | 0.095     | 0.000 | 0.153 | 0.099 | 0.095                 |        |    |
|       |                                 | Malignancy               | 3      | 0.073    | 0.080     | 0.933 | 0.000 | 0.000 | 0.000                 |        |    |
|       |                                 | Other                    | 5      | 0.122    | 0.109     | 0.067 | 0.463 | 0.000 | 0.098                 |        |    |

|    |                                                             |                    |     |       |       |       |       |       |       |        |    |
|----|-------------------------------------------------------------|--------------------|-----|-------|-------|-------|-------|-------|-------|--------|----|
| 14 | XX03: Autopsy                                               | None               | 17  | 0.327 | 0.321 | 0.893 | 0.000 | 0.114 | 0.393 | -26.48 | 79 |
|    |                                                             | General w/o brain  | 1   | 0.019 | 0.019 | 0.000 | 0.000 | 0.000 | 0.033 |        |    |
|    |                                                             | General with brain | 8   | 0.154 | 0.166 | 0.000 | 0.892 | 0.101 | 0.120 |        |    |
|    |                                                             | Brain Only         | 26  | 0.500 | 0.493 | 0.107 | 0.108 | 0.785 | 0.455 |        |    |
| 15 | Periods since first time sought help RECODE                 | 0-4                | 203 | 0.187 | 0.177 | 0.104 | 0.734 | 0.000 | 0.000 | 644.72 | 11 |
|    |                                                             | 5-9                | 335 | 0.309 | 0.305 | 0.385 | 0.229 | 0.694 | 0.000 |        |    |
|    |                                                             | 10-14              | 288 | 0.265 | 0.271 | 0.330 | 0.037 | 0.306 | 0.362 |        |    |
|    |                                                             | 15-19              | 178 | 0.164 | 0.170 | 0.140 | 0.000 | 0.000 | 0.431 |        |    |
|    |                                                             | 20+                | 81  | 0.075 | 0.077 | 0.041 | 0.000 | 0.000 | 0.206 |        |    |
| 16 | PP43: Wandered Away                                         | No                 | 823 | 0.896 | 0.895 | 1.000 | 0.931 | 0.782 | 0.899 | 23.99  | 46 |
|    |                                                             | Yes                | 96  | 0.104 | 0.105 | 0.000 | 0.069 | 0.218 | 0.101 |        |    |
| 17 | PP44: Verbal Outbursts                                      | No                 | 625 | 0.680 | 0.680 | 0.810 | 0.813 | 0.572 | 0.589 | 14.60  | 53 |
|    |                                                             | Yes                | 294 | 0.320 | 0.320 | 0.190 | 0.187 | 0.428 | 0.411 |        |    |
| 18 | PP45: Physical Threats                                      | No                 | 746 | 0.812 | 0.813 | 0.984 | 0.982 | 0.779 | 0.597 | 83.29  | 35 |
|    |                                                             | Threatening        | 97  | 0.106 | 0.105 | 0.016 | 0.014 | 0.154 | 0.192 |        |    |
|    |                                                             | Physical           | 76  | 0.083 | 0.082 | 0.000 | 0.004 | 0.067 | 0.211 |        |    |
| 19 | PP50: Difficulty Sleeping                                   | No                 | 655 | 0.713 | 0.713 | 0.671 | 0.690 | 0.636 | 0.831 | -7.11  | 60 |
|    |                                                             | Yes                | 264 | 0.287 | 0.287 | 0.329 | 0.310 | 0.364 | 0.169 |        |    |
| 20 | PP51: How Much Sleep?                                       | Slight             | 112 | 0.431 | 0.430 | 0.619 | 0.407 | 0.326 | 0.398 | -14.46 | 65 |
|    |                                                             | 2 hr               | 101 | 0.388 | 0.390 | 0.381 | 0.189 | 0.561 | 0.404 |        |    |
|    |                                                             | < 2 hr             | 6   | 0.023 | 0.023 | 0.000 | 0.010 | 0.041 | 0.039 |        |    |
|    |                                                             | Excessive          | 41  | 0.158 | 0.157 | 0.000 | 0.393 | 0.072 | 0.160 |        |    |
| 21 | Overall mMMS GATE                                           | No answers         | 410 | 0.358 | 0.362 | 0.113 | 0.124 | 0.171 | 0.810 | 270.92 | 28 |
|    |                                                             | Any answers        | 736 | 0.642 | 0.638 | 0.887 | 0.876 | 0.829 | 0.190 |        |    |
| 22 | SS01: mMMS RECODE                                           | 0-19               | 215 | 0.294 | 0.277 | 0.000 | 0.000 | 0.295 | 0.971 | 528.27 | 16 |
|    |                                                             | 20-29              | 132 | 0.180 | 0.190 | 0.000 | 0.221 | 0.439 | 0.000 |        |    |
|    |                                                             | 30-39              | 203 | 0.277 | 0.285 | 0.251 | 0.508 | 0.267 | 0.029 |        |    |
|    |                                                             | 40+                | 182 | 0.249 | 0.248 | 0.749 | 0.270 | 0.000 | 0.000 |        |    |
| 23 | SS02: mMMS - Orientation: RECODE                            | 0                  | 145 | 0.197 | 0.184 | 0.000 | 0.000 | 0.002 | 0.920 | 481.04 | 18 |
|    |                                                             | 1-5                | 347 | 0.471 | 0.478 | 0.185 | 0.463 | 0.998 | 0.080 |        |    |
|    |                                                             | >5                 | 244 | 0.332 | 0.338 | 0.815 | 0.537 | 0.000 | 0.000 |        |    |
| 24 | SS03: mMMS - Registration                                   | 0                  | 104 | 0.141 | 0.143 | 0.000 | 0.011 | 0.021 | 0.674 | 280.74 | 27 |
|    |                                                             | 1                  | 76  | 0.103 | 0.106 | 0.000 | 0.089 | 0.135 | 0.208 |        |    |
|    |                                                             | 2                  | 109 | 0.148 | 0.152 | 0.004 | 0.169 | 0.318 | 0.056 |        |    |
|    |                                                             | 3                  | 447 | 0.607 | 0.599 | 0.996 | 0.731 | 0.527 | 0.061 |        |    |
| 25 | SS07: mMMS - serial 7s, WORLD, and Add coins                | 0                  | 317 | 0.432 | 0.428 | 0.000 | 0.251 | 0.625 | 0.887 | 239.90 | 30 |
|    |                                                             | 1                  | 97  | 0.132 | 0.134 | 0.000 | 0.232 | 0.160 | 0.112 |        |    |
|    |                                                             | 2                  | 55  | 0.075 | 0.077 | 0.051 | 0.125 | 0.102 | 0.000 |        |    |
|    |                                                             | 3                  | 30  | 0.041 | 0.041 | 0.078 | 0.065 | 0.018 | 0.000 |        |    |
|    |                                                             | 4                  | 44  | 0.060 | 0.060 | 0.127 | 0.065 | 0.044 | 0.000 |        |    |
|    |                                                             | 5                  | 62  | 0.084 | 0.084 | 0.238 | 0.081 | 0.024 | 0.000 |        |    |
|    |                                                             | 6                  | 65  | 0.089 | 0.089 | 0.250 | 0.100 | 0.011 | 0.000 |        |    |
|    |                                                             | 7                  | 64  | 0.087 | 0.087 | 0.257 | 0.081 | 0.018 | 0.000 |        |    |
| 26 | SS09: mMMS - Recall 3-word memory                           | 0                  | 549 | 0.747 | 0.744 | 0.347 | 0.787 | 0.894 | 0.923 | 70.92  | 37 |
|    |                                                             | 1                  | 103 | 0.140 | 0.141 | 0.302 | 0.114 | 0.106 | 0.045 |        |    |
|    |                                                             | 2                  | 56  | 0.076 | 0.077 | 0.203 | 0.086 | 0.000 | 0.032 |        |    |
|    |                                                             | 3                  | 27  | 0.037 | 0.037 | 0.148 | 0.012 | 0.000 | 0.000 |        |    |
| 27 | SS11: mMMS - repeat 2 phrases, 3-stage command, read & obey | 0                  | 108 | 0.147 | 0.142 | 0.000 | 0.000 | 0.000 | 0.717 | 373.20 | 23 |
|    |                                                             | 1                  | 57  | 0.078 | 0.077 | 0.000 | 0.000 | 0.138 | 0.188 |        |    |
|    |                                                             | 2                  | 47  | 0.064 | 0.066 | 0.000 | 0.049 | 0.179 | 0.000 |        |    |
|    |                                                             | 3                  | 63  | 0.086 | 0.088 | 0.008 | 0.082 | 0.218 | 0.000 |        |    |
|    |                                                             | 4                  | 64  | 0.087 | 0.090 | 0.000 | 0.104 | 0.195 | 0.019 |        |    |
|    |                                                             | 5                  | 98  | 0.134 | 0.135 | 0.101 | 0.246 | 0.095 | 0.076 |        |    |
|    |                                                             | 6                  | 128 | 0.174 | 0.175 | 0.268 | 0.314 | 0.087 | 0.000 |        |    |
|    |                                                             | 7                  | 169 | 0.230 | 0.226 | 0.623 | 0.205 | 0.088 | 0.000 |        |    |
| 28 | SS12: mMMS - circle, diamond, cube                          | 0                  | 343 | 0.468 | 0.477 | 0.000 | 0.356 | 0.624 | 0.987 | 297.50 | 26 |
|    |                                                             | 1                  | 194 | 0.265 | 0.266 | 0.348 | 0.373 | 0.270 | 0.013 |        |    |
|    |                                                             | 2                  | 196 | 0.267 | 0.257 | 0.652 | 0.271 | 0.105 | 0.000 |        |    |

|    |                                           |                       |     |       |       |       |       |       |       |        |    |
|----|-------------------------------------------|-----------------------|-----|-------|-------|-------|-------|-------|-------|--------|----|
| 29 | CC08: Living Status                       | Home                  | 650 | 0.707 | 0.703 | 0.924 | 0.994 | 0.984 | 0.078 | 469.04 | 19 |
|    |                                           | Retirement Home       | 8   | 0.009 | 0.009 | 0.018 | 0.006 | 0.014 | 0.000 |        |    |
|    |                                           | Nursing Home          | 224 | 0.244 | 0.248 | 0.000 | 0.000 | 0.000 | 0.827 |        |    |
|    |                                           | Hospital              | 5   | 0.005 | 0.006 | 0.001 | 0.000 | 0.002 | 0.015 |        |    |
|    |                                           | Rehabilitation Center | 18  | 0.020 | 0.020 | 0.000 | 0.000 | 0.000 | 0.066 |        |    |
|    |                                           | Other                 | 14  | 0.015 | 0.015 | 0.057 | 0.000 | 0.000 | 0.013 |        |    |
| 30 | Periods since entered nursing home RECODE | 0-4                   | 131 | 0.585 | 0.566 | 1.000 | 1.000 | 0.945 | 0.425 | -20.19 | 75 |
|    |                                           | 5-9                   | 68  | 0.304 | 0.319 | 0.000 | 0.000 | 0.000 | 0.433 |        |    |
|    |                                           | 10-14                 | 20  | 0.089 | 0.092 | 0.000 | 0.000 | 0.035 | 0.116 |        |    |
|    |                                           | 15-19                 | 4   | 0.018 | 0.019 | 0.000 | 0.000 | 0.000 | 0.025 |        |    |
|    |                                           | 20+                   | 1   | 0.004 | 0.004 | 0.000 | 0.000 | 0.019 | 0.000 |        |    |
| 31 | NN01: Patient Trouble With Chores         | None                  | 67  | 0.073 | 0.074 | 0.134 | 0.199 | 0.005 | 0.000 | 375.41 | 22 |
|    |                                           | Some                  | 262 | 0.285 | 0.289 | 0.669 | 0.545 | 0.109 | 0.000 |        |    |
|    |                                           | A Lot                 | 590 | 0.642 | 0.637 | 0.196 | 0.256 | 0.886 | 1.000 |        |    |
| 32 | NN02: Patient Trouble Handling Money      | None                  | 92  | 0.100 | 0.103 | 0.369 | 0.124 | 0.000 | 0.000 | 425.67 | 21 |
|    |                                           | Some                  | 201 | 0.219 | 0.225 | 0.550 | 0.438 | 0.050 | 0.000 |        |    |
|    |                                           | A Lot                 | 626 | 0.681 | 0.672 | 0.081 | 0.438 | 0.950 | 1.000 |        |    |
| 33 | NN03: Patient Trouble Remembering Lists   | None                  | 10  | 0.011 | 0.011 | 0.039 | 0.002 | 0.010 | 0.000 | 117.54 | 34 |
|    |                                           | Some                  | 113 | 0.123 | 0.126 | 0.289 | 0.286 | 0.008 | 0.000 |        |    |
|    |                                           | A Lot                 | 796 | 0.866 | 0.863 | 0.672 | 0.712 | 0.981 | 1.000 |        |    |
| 34 | NN04: Patient Trouble Around House        | None                  | 483 | 0.526 | 0.520 | 1.000 | 0.936 | 0.384 | 0.000 | 724.38 | 4  |
|    |                                           | Some                  | 160 | 0.174 | 0.179 | 0.000 | 0.064 | 0.574 | 0.026 |        |    |
|    |                                           | A Lot                 | 275 | 0.300 | 0.301 | 0.000 | 0.000 | 0.042 | 0.974 |        |    |
| 35 | NN05: Patient Trouble Around Neighborhood | None                  | 367 | 0.400 | 0.407 | 0.829 | 0.831 | 0.184 | 0.000 | 621.35 | 13 |
|    |                                           | Some                  | 129 | 0.141 | 0.148 | 0.171 | 0.134 | 0.304 | 0.000 |        |    |
|    |                                           | A Lot                 | 422 | 0.460 | 0.445 | 0.000 | 0.035 | 0.512 | 1.000 |        |    |
| 36 | NN06: Patient Trouble Recognizing Place   | None                  | 469 | 0.510 | 0.524 | 0.951 | 0.866 | 0.495 | 0.000 | 637.06 | 12 |
|    |                                           | Some                  | 148 | 0.161 | 0.167 | 0.049 | 0.124 | 0.449 | 0.023 |        |    |
|    |                                           | A Lot                 | 302 | 0.329 | 0.309 | 0.000 | 0.010 | 0.056 | 0.977 |        |    |
| 37 | NN07: Patient Trouble Remembering Things  | None                  | 25  | 0.027 | 0.028 | 0.089 | 0.035 | 0.006 | 0.000 | 136.78 | 33 |
|    |                                           | Some                  | 160 | 0.174 | 0.174 | 0.315 | 0.411 | 0.062 | 0.000 |        |    |
|    |                                           | A Lot                 | 734 | 0.799 | 0.799 | 0.596 | 0.554 | 0.933 | 1.000 |        |    |
| 38 | NN08: Patient Dwell in the Past           | None                  | 620 | 0.676 | 0.676 | 0.601 | 0.565 | 0.521 | 0.956 | 50.60  | 41 |
|    |                                           | Some                  | 155 | 0.169 | 0.169 | 0.222 | 0.203 | 0.272 | 0.012 |        |    |
|    |                                           | A Lot                 | 142 | 0.155 | 0.155 | 0.178 | 0.232 | 0.207 | 0.032 |        |    |
| 39 | NN09: Patient Eating                      | Eats Cleanly          | 561 | 0.610 | 0.585 | 1.000 | 0.907 | 0.625 | 0.022 | 564.63 | 15 |
|    |                                           | Eats Messy            | 197 | 0.214 | 0.222 | 0.000 | 0.093 | 0.375 | 0.331 |        |    |
|    |                                           | Eats Solids           | 30  | 0.033 | 0.036 | 0.000 | 0.000 | 0.000 | 0.120 |        |    |
|    |                                           | Has to be Fed         | 131 | 0.143 | 0.157 | 0.000 | 0.000 | 0.000 | 0.526 |        |    |
| 40 | NN10: Patient Dressing                    | Dress No Help         | 355 | 0.386 | 0.385 | 0.806 | 0.809 | 0.139 | 0.000 | 832.35 | 2  |
|    |                                           | Misses Details        | 167 | 0.182 | 0.185 | 0.194 | 0.181 | 0.384 | 0.000 |        |    |
|    |                                           | Gets Mixed Up         | 117 | 0.127 | 0.132 | 0.000 | 0.010 | 0.477 | 0.000 |        |    |
|    |                                           | Unable to Dress       | 280 | 0.305 | 0.298 | 0.000 | 0.000 | 0.000 | 1.000 |        |    |
| 41 | NN11: Patient Bladder and Bowel Control   | Never Wets Bed        | 601 | 0.654 | 0.641 | 0.986 | 0.966 | 0.798 | 0.016 | 648.54 | 10 |
|    |                                           | Occasionally Wets     | 74  | 0.081 | 0.079 | 0.014 | 0.034 | 0.202 | 0.045 |        |    |
|    |                                           | Frequently Wets       | 50  | 0.054 | 0.057 | 0.000 | 0.000 | 0.000 | 0.192 |        |    |
|    |                                           | Incontinent           | 194 | 0.211 | 0.223 | 0.000 | 0.000 | 0.000 | 0.746 |        |    |
| 42 | RR01: Needs Reminders                     | No                    | 30  | 0.033 | 0.033 | 0.084 | 0.072 | 0.000 | 0.000 | 64.23  | 38 |
|    |                                           | Occasionally          | 39  | 0.042 | 0.043 | 0.135 | 0.071 | 0.000 | 0.000 |        |    |
|    |                                           | Frequently            | 849 | 0.925 | 0.923 | 0.781 | 0.858 | 1.000 | 1.000 |        |    |
| 43 | RR02: Needs Help to Remember              | No                    | 15  | 0.016 | 0.017 | 0.056 | 0.023 | 0.000 | 0.000 | 34.39  | 43 |
|    |                                           | Occasionally          | 32  | 0.035 | 0.035 | 0.117 | 0.051 | 0.000 | 0.000 |        |    |
|    |                                           | Frequently            | 872 | 0.949 | 0.948 | 0.826 | 0.926 | 1.000 | 1.000 |        |    |
| 44 | RR03: Needs Help Finding Things           | No                    | 30  | 0.033 | 0.033 | 0.112 | 0.045 | 0.000 | 0.000 | 27.59  | 44 |
|    |                                           | Yes                   | 889 | 0.967 | 0.967 | 0.888 | 0.955 | 1.000 | 1.000 |        |    |
| 45 | RR04: Needs Household Chores Done         | No                    | 203 | 0.221 | 0.233 | 0.532 | 0.553 | 0.000 | 0.000 | 315.43 | 25 |
|    |                                           | Yes                   | 715 | 0.779 | 0.767 | 0.468 | 0.447 | 1.000 | 1.000 |        |    |
| 46 | RR05: Needs Watching When Awake           | No                    | 452 | 0.492 | 0.503 | 1.000 | 0.939 | 0.240 | 0.071 | 452.11 | 20 |
|    |                                           | Yes                   | 467 | 0.508 | 0.497 | 0.000 | 0.061 | 0.760 | 0.929 |        |    |

|    |                                                      |                         |     |       |       |       |       |       |       |        |    |
|----|------------------------------------------------------|-------------------------|-----|-------|-------|-------|-------|-------|-------|--------|----|
| 47 | RR06: Needs to be Escorted When Outside              | No                      | 424 | 0.461 | 0.477 | 0.973 | 0.922 | 0.253 | 0.002 | 520.51 | 17 |
|    |                                                      | Yes                     | 495 | 0.539 | 0.523 | 0.027 | 0.078 | 0.747 | 0.998 |        |    |
| 48 | RR07: Needs to be Accompanied Bathing/Eating         | No                      | 514 | 0.559 | 0.583 | 1.000 | 1.000 | 0.561 | 0.000 | 684.86 | 7  |
|    |                                                      | Yes                     | 405 | 0.441 | 0.417 | 0.000 | 0.000 | 0.439 | 1.000 |        |    |
| 49 | RR08: Needs to be Dressed/Washed/Groomed             | No                      | 587 | 0.639 | 0.663 | 1.000 | 1.000 | 0.857 | 0.000 | 687.12 | 6  |
|    |                                                      | Yes                     | 332 | 0.361 | 0.337 | 0.000 | 0.000 | 0.143 | 1.000 |        |    |
| 50 | RR09: Needs to be Taken to Toilet                    | No                      | 667 | 0.726 | 0.707 | 1.000 | 1.000 | 1.000 | 0.018 | 654.51 | 8  |
|    |                                                      | Yes                     | 252 | 0.274 | 0.293 | 0.000 | 0.000 | 0.000 | 0.982 |        |    |
| 51 | RR10: Needs to be Fed                                | No                      | 774 | 0.842 | 0.821 | 1.000 | 1.000 | 1.000 | 0.400 | 349.86 | 24 |
|    |                                                      | Yes                     | 145 | 0.158 | 0.179 | 0.000 | 0.000 | 0.000 | 0.600 |        |    |
| 52 | RR11: Needs to be Turned/Moved/Transferred           | No                      | 798 | 0.868 | 0.857 | 1.000 | 1.000 | 1.000 | 0.520 | 267.60 | 29 |
|    |                                                      | Yes                     | 121 | 0.132 | 0.143 | 0.000 | 0.000 | 0.000 | 0.480 |        |    |
| 53 | RR12: Needs to Wear Diaper/Catheter                  | No                      | 685 | 0.745 | 0.702 | 1.000 | 1.000 | 1.000 | 0.000 | 649.00 | 9  |
|    |                                                      | Yes                     | 234 | 0.255 | 0.298 | 0.000 | 0.000 | 0.000 | 1.000 |        |    |
| 54 | RR13: Needs to be Tube Fed                           | No                      | 902 | 0.982 | 0.981 | 1.000 | 1.000 | 1.000 | 0.937 | 13.90  | 54 |
|    |                                                      | Yes                     | 17  | 0.018 | 0.019 | 0.000 | 0.000 | 0.000 | 0.063 |        |    |
| 55 | RR14: Dependence Level                               | Level 0                 | 11  | 0.012 | 0.012 | 0.049 | 0.010 | 0.000 | 0.000 | 881.54 | 1  |
|    |                                                      | Level 1                 | 12  | 0.013 | 0.013 | 0.051 | 0.012 | 0.000 | 0.000 |        |    |
|    |                                                      | Level 2                 | 330 | 0.359 | 0.354 | 0.761 | 0.808 | 0.059 | 0.000 |        |    |
|    |                                                      | Level 3                 | 227 | 0.247 | 0.233 | 0.136 | 0.169 | 0.615 | 0.000 |        |    |
|    |                                                      | Level 4                 | 101 | 0.110 | 0.104 | 0.003 | 0.000 | 0.326 | 0.052 |        |    |
|    |                                                      | Level 5                 | 238 | 0.259 | 0.283 | 0.000 | 0.000 | 0.000 | 0.948 |        |    |
| 56 | RR15: Equivalent Institutional Service               | Limited Home Care       | 201 | 0.219 | 0.228 | 0.631 | 0.439 | 0.000 | 0.000 | 746.19 | 3  |
|    |                                                      | Adult Home              | 364 | 0.396 | 0.420 | 0.365 | 0.561 | 0.803 | 0.000 |        |    |
|    |                                                      | Health Related Facility | 354 | 0.385 | 0.352 | 0.004 | 0.000 | 0.197 | 1.000 |        |    |
| 57 | Neurologist Estimation of Illness (No. of INTERVALS) | 0-4                     | 47  | 0.044 | 0.040 | 0.010 | 0.173 | 0.000 | 0.000 | 575.58 | 14 |
|    |                                                      | 5-9                     | 225 | 0.210 | 0.195 | 0.111 | 0.583 | 0.175 | 0.000 |        |    |
|    |                                                      | 10-14                   | 312 | 0.291 | 0.285 | 0.344 | 0.245 | 0.578 | 0.039 |        |    |
|    |                                                      | 15-19                   | 256 | 0.239 | 0.248 | 0.353 | 0.000 | 0.247 | 0.357 |        |    |
|    |                                                      | 20+                     | 233 | 0.217 | 0.232 | 0.182 | 0.000 | 0.000 | 0.604 |        |    |
| 58 | KK16: Had Seizure?                                   | No                      | 851 | 0.978 | 0.978 | 1.000 | 0.983 | 0.971 | 0.966 | -16.03 | 67 |
|    |                                                      | Yes                     | 19  | 0.022 | 0.022 | 0.000 | 0.017 | 0.029 | 0.034 |        |    |
| 59 | KK17: First Time Seizure?                            | No                      | 10  | 0.556 | 0.549 | 0.637 | 0.682 | 0.675 | 0.374 | -7.76  | 62 |
|    |                                                      | Yes                     | 8   | 0.444 | 0.451 | 0.363 | 0.318 | 0.325 | 0.626 |        |    |
| 60 | Periods since seizures began RECODE                  | 0-4                     | 40  | 0.494 | 0.483 | 0.923 | 0.635 | 0.358 | 0.449 | -23.27 | 77 |
|    |                                                      | 5-9                     | 14  | 0.173 | 0.175 | 0.077 | 0.000 | 0.345 | 0.130 |        |    |
|    |                                                      | 9-14                    | 9   | 0.111 | 0.115 | 0.000 | 0.014 | 0.000 | 0.225 |        |    |
|    |                                                      | 15+                     | 18  | 0.222 | 0.227 | 0.000 | 0.351 | 0.297 | 0.196 |        |    |
| 61 | KK19: How Frequently Do Seizures Occur?              | One per Month           | 9   | 0.563 | 0.543 | 0.658 | 0.744 | 0.344 | 0.560 | -17.94 | 68 |
|    |                                                      | 2-5 per Month           | 3   | 0.188 | 0.170 | 0.342 | 0.256 | 0.000 | 0.197 |        |    |
|    |                                                      | 6-10 per Month          | 2   | 0.125 | 0.165 | 0.000 | 0.000 | 0.610 | 0.000 |        |    |
|    |                                                      | >10 per Month           | 2   | 0.125 | 0.122 | 0.000 | 0.000 | 0.046 | 0.243 |        |    |
| 62 | FF10: Adequate Sight?                                | No                      | 49  | 0.133 | 0.132 | 0.020 | 0.091 | 0.090 | 0.393 | 3.23   | 57 |
|    |                                                      | Yes                     | 319 | 0.867 | 0.868 | 0.980 | 0.909 | 0.910 | 0.607 |        |    |
| 63 | JJ17A: Beer/Week: RECODE                             | 0                       | 812 | 0.947 | 0.947 | 0.947 | 0.890 | 0.936 | 1.000 | -3.78  | 59 |
|    |                                                      | 1-7                     | 39  | 0.046 | 0.046 | 0.053 | 0.079 | 0.064 | 0.000 |        |    |
|    |                                                      | >7                      | 6   | 0.007 | 0.007 | 0.000 | 0.031 | 0.000 | 0.000 |        |    |
| 64 | JJ17B: Wine/Week: RECODE                             | 0                       | 763 | 0.894 | 0.895 | 0.652 | 0.920 | 0.944 | 1.000 | 53.22  | 40 |
|    |                                                      | 1-7                     | 73  | 0.086 | 0.085 | 0.265 | 0.080 | 0.046 | 0.000 |        |    |
|    |                                                      | >7                      | 17  | 0.020 | 0.020 | 0.083 | 0.000 | 0.010 | 0.000 |        |    |
| 65 | JJ17C: Hard Liquor/Week: RECODE                      | 0                       | 770 | 0.902 | 0.901 | 0.781 | 0.855 | 0.921 | 1.000 | 19.26  | 50 |
|    |                                                      | 1-7                     | 55  | 0.064 | 0.064 | 0.125 | 0.125 | 0.039 | 0.000 |        |    |
|    |                                                      | >7                      | 29  | 0.034 | 0.034 | 0.093 | 0.020 | 0.040 | 0.000 |        |    |
| 66 | JJ17D: All Alcoholic Drinks/Week: RECODE             | 0                       | 679 | 0.790 | 0.790 | 0.596 | 0.682 | 0.792 | 1.000 | 76.82  | 36 |
|    |                                                      | 1-7                     | 115 | 0.134 | 0.134 | 0.207 | 0.244 | 0.138 | 0.000 |        |    |
|    |                                                      | >7                      | 65  | 0.076 | 0.076 | 0.197 | 0.075 | 0.070 | 0.000 |        |    |
| 67 | EF1: Hypertension                                    | No                      | 778 | 0.996 | 0.996 | 1.000 | 0.980 | 1.000 | 1.000 | -15.45 | 66 |
|    |                                                      | Yes                     | 3   | 0.004 | 0.004 | 0.000 | 0.020 | 0.000 | 0.000 |        |    |
| 68 | EF2: Diabetes                                        | No                      | 781 | 0.999 | 0.999 | 1.000 | 1.000 | 1.000 | 0.996 | -18.30 | 70 |

| |

|Yes

|

1

0.001

0.001

0.000

0.000

0.000

0.004

|

|       |                                             |         |        |        |        |        |        |        |        |        |           |    |
|-------|---------------------------------------------|---------|--------|--------|--------|--------|--------|--------|--------|--------|-----------|----|
| 69    | EF3: Myocardial Infarction                  | No      | 781    | 0.999  | 0.999  | 0.994  | 1.000  | 1.000  | 1.000  | 1.000  | -18.21    | 69 |
|       |                                             | Yes     | 1      | 0.001  | 0.001  | 0.006  | 0.000  | 0.000  | 0.000  | 0.000  |           |    |
| 70    | EF4: Heart Disease                          | No      | 773    | 0.988  | 0.988  | 0.991  | 0.977  | 0.991  | 0.992  | 0.992  | -18.73    | 71 |
|       |                                             | Yes     | 9      | 0.012  | 0.012  | 0.009  | 0.023  | 0.009  | 0.008  | 0.008  |           |    |
| 71    | EF5: Stroke                                 | No      | 585    | 0.992  | 0.992  | 0.964  | 1.000  | 1.000  | 0.993  | 0.993  | -13.16    | 64 |
|       |                                             | Yes     | 5      | 0.008  | 0.008  | 0.036  | 0.000  | 0.000  | 0.007  | 0.007  |           |    |
| 72    | EF5A: TIA                                   | No      | 28     | 0.824  | 0.842  | 1.000  | 0.657  | 0.000  | 1.000  | 1.000  | 6.52      | 56 |
|       |                                             | Yes     | 6      | 0.176  | 0.158  | 0.000  | 0.343  | 1.000  | 0.000  | 0.000  |           |    |
| 73    | EF6: Surgery                                | No      | 749    | 0.960  | 0.960  | 0.964  | 0.974  | 0.960  | 0.950  | 0.950  | -18.98    | 72 |
|       |                                             | Yes     | 31     | 0.040  | 0.040  | 0.036  | 0.026  | 0.040  | 0.050  | 0.050  |           |    |
| 74    | EF7: Admission to Hospital                  | No      | 693    | 0.884  | 0.884  | 0.932  | 0.922  | 0.896  | 0.823  | 0.823  | -9.93     | 63 |
|       |                                             | Yes     | 91     | 0.116  | 0.116  | 0.068  | 0.078  | 0.104  | 0.177  | 0.177  |           |    |
| 75    | EF8: Treatment                              | No      | 662    | 0.847  | 0.847  | 0.901  | 0.962  | 0.913  | 0.695  | 0.695  | 22.02     | 48 |
|       |                                             | Yes     | 120    | 0.153  | 0.153  | 0.099  | 0.038  | 0.087  | 0.305  | 0.305  |           |    |
| 76    | NNTOT: Total dependence scale score: RECODE | 0-5     | 74     | 0.081  | 0.083  | 0.255  | 0.136  | 0.000  | 0.000  | 0.000  | 708.70    | 5  |
|       |                                             | 6-10    | 256    | 0.280  | 0.288  | 0.676  | 0.549  | 0.092  | 0.000  | 0.000  |           |    |
|       |                                             | 11-15   | 255    | 0.279  | 0.293  | 0.068  | 0.314  | 0.723  | 0.034  | 0.034  |           |    |
|       |                                             | >15     | 330    | 0.361  | 0.336  | 0.000  | 0.000  | 0.185  | 0.966  | 0.966  |           |    |
| 77    | DELUSION: Delusions                         | Absent  | 574    | 0.627  | 0.634  | 0.910  | 0.528  | 0.159  | 0.966  | 0.966  | 175.80    | 31 |
|       |                                             | Present | 341    | 0.373  | 0.366  | 0.090  | 0.472  | 0.841  | 0.034  | 0.034  |           |    |
| 78    | HALLUCIN: Hallucinations                    | Absent  | 792    | 0.866  | 0.865  | 1.000  | 0.894  | 0.718  | 0.885  | 0.885  | 35.13     | 42 |
|       |                                             | Present | 123    | 0.134  | 0.135  | 0.000  | 0.106  | 0.282  | 0.115  | 0.115  |           |    |
| 79    | ILLUSION: Illusions                         | Absent  | 879    | 0.961  | 0.961  | 1.000  | 0.948  | 0.908  | 0.992  | 0.992  | -1.22     | 58 |
|       |                                             | Present | 36     | 0.039  | 0.039  | 0.000  | 0.052  | 0.092  | 0.008  | 0.008  |           |    |
| 80    | EPSXS: Moderate extrapyramidal symptoms     | Absent  | 436    | 0.740  | 0.740  | 0.980  | 0.879  | 0.775  | 0.040  | 0.040  | 151.61    | 32 |
|       |                                             | Present | 153    | 0.260  | 0.260  | 0.020  | 0.121  | 0.225  | 0.960  | 0.960  |           |    |
| Total |                                             |         | 65,988 | 80.000 | 80.000 | 80.000 | 80.000 | 80.000 | 80.000 | 80.000 | 16,884.59 |    |



Web Table A4: Response Probabilities by Pure Type for the 3-Dimensional Model of AD Progression in the Predictors 1 Data, Females

| j  | Variable                        | Response                 | No. of |          | Pure Type |       |       |       | ΔBIC <sub>j</sub> 0-3 | Rank   |    |
|----|---------------------------------|--------------------------|--------|----------|-----------|-------|-------|-------|-----------------------|--------|----|
|    |                                 |                          | Obs.   | Observed | Predicted | I     | II    | III   |                       |        | IV |
| 1  | Prospective 6-month survival    | Died                     | 92     | 0.055    | 0.055     | 0.004 | 0.001 | 0.094 | 0.099                 | 27.83  | 51 |
|    |                                 | Survived                 | 1,581  | 0.945    | 0.945     | 0.996 | 0.999 | 0.906 | 0.901                 |        |    |
| 2  | Retrospective 6-month survival  | Dead                     | 76     | 0.047    | 0.047     | 0.000 | 0.002 | 0.081 | 0.078                 | 20.77  | 54 |
|    |                                 | Alive                    | 1,533  | 0.953    | 0.953     | 1.000 | 0.998 | 0.919 | 0.922                 |        |    |
| 3  | Age-group at Intake:            | 1=<65                    | 303    | 0.172    | 0.184     | 0.102 | 0.272 | 0.000 | 0.234                 | 799.11 | 16 |
|    |                                 | 2=65-69                  | 262    | 0.149    | 0.159     | 0.208 | 0.181 | 0.000 | 0.188                 |        |    |
|    |                                 | 2=70-74                  | 389    | 0.221    | 0.237     | 0.289 | 0.250 | 0.000 | 0.300                 |        |    |
|    |                                 | 2=75-79                  | 427    | 0.243    | 0.259     | 0.402 | 0.297 | 0.000 | 0.277                 |        |    |
|    |                                 | 2=80-84                  | 172    | 0.098    | 0.074     | 0.000 | 0.000 | 0.456 | 0.000                 |        |    |
|    |                                 | 6=85+                    | 205    | 0.117    | 0.088     | 0.000 | 0.000 | 0.544 | 0.000                 |        |    |
| 4  | B04: Ethnic Group               | White                    | 1,611  | 0.916    | 0.916     | 0.861 | 0.895 | 1.000 | 0.919                 | 11.78  | 56 |
|    |                                 | Black                    | 131    | 0.075    | 0.075     | 0.139 | 0.093 | 0.000 | 0.066                 |        |    |
|    |                                 | Other                    | 16     | 0.009    | 0.009     | 0.000 | 0.012 | 0.000 | 0.015                 |        |    |
| 5  | B05: Hispanic                   | Not Hispanic             | 1,679  | 0.955    | 0.955     | 0.980 | 0.947 | 0.900 | 0.972                 | -2.06  | 62 |
|    |                                 | Mexican/Mex-Amer/Chicano | 13     | 0.007    | 0.007     | 0.000 | 0.022 | 0.000 | 0.004                 |        |    |
|    |                                 | Puerto Rican             | 16     | 0.009    | 0.009     | 0.020 | 0.021 | 0.000 | 0.000                 |        |    |
|    |                                 | Cuban                    | 0      | 0.000    | 0.000     | 0.000 | 0.000 | 0.000 | 0.000                 |        |    |
|    |                                 | Dominican                | 21     | 0.012    | 0.012     | 0.000 | 0.010 | 0.000 | 0.024                 |        |    |
| 6  | B06: Highest Grade              | Other                    | 29     | 0.016    | 0.016     | 0.000 | 0.000 | 0.100 | 0.000                 |        |    |
|    |                                 | 0-8                      | 235    | 0.134    | 0.134     | 0.174 | 0.152 | 0.000 | 0.158                 | 108.34 | 38 |
|    |                                 | 9-12                     | 917    | 0.522    | 0.522     | 0.392 | 0.402 | 1.000 | 0.465                 |        |    |
|    |                                 | >12                      | 606    | 0.345    | 0.344     | 0.434 | 0.446 | 0.000 | 0.377                 |        |    |
| 7  | B07: Birth Place                | United States            | 1,554  | 0.888    | 0.892     | 0.979 | 0.969 | 0.466 | 0.976                 |        |    |
|    |                                 | Puerto Rico              | 16     | 0.009    | 0.009     | 0.021 | 0.021 | 0.000 | 0.000                 |        |    |
|    |                                 | Dominican Rep.           | 21     | 0.012    | 0.012     | 0.000 | 0.010 | 0.000 | 0.024                 |        |    |
|    |                                 | Other                    | 159    | 0.091    | 0.086     | 0.000 | 0.000 | 0.534 | 0.000                 |        |    |
| 8  | B08: State of Birth             | New York                 | 457    | 0.294    | 0.297     | 0.464 | 0.334 | 0.000 | 0.300                 | 73.38  | 43 |
|    |                                 | New Jersey               | 85     | 0.055    | 0.055     | 0.000 | 0.107 | 0.000 | 0.062                 |        |    |
|    |                                 | Other                    | 1,012  | 0.651    | 0.648     | 0.536 | 0.559 | 1.000 | 0.638                 |        |    |
| 9  | B09: Citizen of US              | No                       | 24     | 0.014    | 0.014     | 0.018 | 0.027 | 0.000 | 0.010                 | -13.26 | 66 |
|    |                                 | Yes                      | 1,672  | 0.986    | 0.986     | 0.982 | 0.973 | 1.000 | 0.990                 |        |    |
| 10 | B12: Predominant Language       | English                  | 1,721  | 0.979    | 0.979     | 0.989 | 0.968 | 1.000 | 0.973                 | -9.68  | 65 |
|    |                                 | Spanish                  | 37     | 0.021    | 0.021     | 0.011 | 0.032 | 0.000 | 0.027                 |        |    |
|    |                                 | Other                    | 0      | 0.000    | 0.000     | 0.000 | 0.000 | 0.000 | 0.000                 |        |    |
| 11 | B13: How Well Is English Spoken | Very Well                | 1,733  | 0.986    | 0.986     | 0.932 | 0.990 | 1.000 | 1.000                 | 0.49   | 60 |
|    |                                 | Well                     | 25     | 0.014    | 0.014     | 0.068 | 0.010 | 0.000 | 0.000                 |        |    |
|    |                                 | Not Well                 | 0      | 0.000    | 0.000     | 0.000 | 0.000 | 0.000 | 0.000                 |        |    |
| 12 | B14: Occupation                 | Housewife                | 298    | 0.170    | 0.170     | 0.138 | 0.243 | 0.075 | 0.174                 | 183.15 | 35 |
|    |                                 | Housewife and Other      | 68     | 0.039    | 0.038     | 0.023 | 0.042 | 0.073 | 0.029                 |        |    |
|    |                                 | Unskilled/Semi_Skilled   | 236    | 0.134    | 0.136     | 0.127 | 0.153 | 0.000 | 0.183                 |        |    |
|    |                                 | Skilled Trade            | 84     | 0.048    | 0.048     | 0.072 | 0.041 | 0.063 | 0.036                 |        |    |
|    |                                 | Clerical/Office          | 640    | 0.364    | 0.364     | 0.330 | 0.315 | 0.404 | 0.395                 |        |    |
|    |                                 | Manager Bus./Govt.       | 116    | 0.066    | 0.062     | 0.000 | 0.000 | 0.385 | 0.000                 |        |    |
|    |                                 | Professional             | 287    | 0.163    | 0.165     | 0.252 | 0.206 | 0.000 | 0.168                 |        |    |
|    |                                 | Other                    | 29     | 0.016    | 0.017     | 0.058 | 0.000 | 0.000 | 0.017                 |        |    |
| 13 | XX01: Cause of Death            | Pneumonia                | 12     | 0.250    | 0.246     | 0.000 | 0.391 | 0.512 | 0.101                 | -44.80 | 79 |
|    |                                 | Other Infection          | 5      | 0.104    | 0.111     | 0.000 | 0.000 | 0.000 | 0.190                 |        |    |
|    |                                 | Cardiovascular           | 12     | 0.250    | 0.237     | 1.000 | 0.000 | 0.259 | 0.239                 |        |    |
|    |                                 | Cerebrovascular          | 1      | 0.021    | 0.022     | 0.000 | 0.000 | 0.000 | 0.038                 |        |    |
|    |                                 | Malignancy               | 6      | 0.125    | 0.126     | 0.000 | 0.609 | 0.000 | 0.096                 |        |    |
|    |                                 | Other                    | 12     | 0.250    | 0.259     | 0.000 | 0.000 | 0.229 | 0.336                 |        |    |

|    |                                                             |                    |       |       |       |       |       |       |       |        |    |
|----|-------------------------------------------------------------|--------------------|-------|-------|-------|-------|-------|-------|-------|--------|----|
| 14 | XX03: Autopsy                                               | None               | 37    | 0.607 | 0.600 | 0.528 | 0.297 | 1.000 | 0.488 | -14.90 | 68 |
|    |                                                             | General w/o brain  | 0     | 0.000 | 0.000 | 0.000 | 0.000 | 0.000 | 0.000 |        |    |
|    |                                                             | General with brain | 5     | 0.082 | 0.084 | 0.000 | 0.134 | 0.000 | 0.116 |        |    |
|    |                                                             | Brain Only         | 19    | 0.311 | 0.316 | 0.472 | 0.568 | 0.000 | 0.396 |        |    |
| 15 | Periods since first time sought help RECODE                 | 0-4                | 300   | 0.194 | 0.185 | 0.659 | 0.177 | 0.209 | 0.000 | 927.81 | 10 |
|    |                                                             | 5-9                | 466   | 0.302 | 0.301 | 0.341 | 0.517 | 0.458 | 0.084 |        |    |
|    |                                                             | 10-14              | 382   | 0.247 | 0.253 | 0.000 | 0.306 | 0.334 | 0.285 |        |    |
|    |                                                             | 15-19              | 241   | 0.156 | 0.159 | 0.000 | 0.000 | 0.000 | 0.384 |        |    |
|    |                                                             | 20+                | 155   | 0.100 | 0.102 | 0.000 | 0.000 | 0.000 | 0.247 |        |    |
| 16 | PP43: Wandered Away                                         | No                 | 1,255 | 0.893 | 0.893 | 1.000 | 0.854 | 0.901 | 0.868 | 21.92  | 53 |
|    |                                                             | Yes                | 150   | 0.107 | 0.107 | 0.000 | 0.146 | 0.099 | 0.132 |        |    |
| 17 | PP44: Verbal Outbursts                                      | No                 | 1,038 | 0.739 | 0.739 | 0.991 | 0.759 | 0.702 | 0.623 | 86.31  | 41 |
|    |                                                             | Yes                | 367   | 0.261 | 0.261 | 0.009 | 0.241 | 0.298 | 0.377 |        |    |
| 18 | PP45: Physical Threats                                      | No                 | 1,175 | 0.836 | 0.837 | 1.000 | 0.890 | 0.803 | 0.736 | 63.50  | 45 |
|    |                                                             | Threatening        | 100   | 0.071 | 0.071 | 0.000 | 0.099 | 0.080 | 0.080 |        |    |
|    |                                                             | Physical           | 130   | 0.093 | 0.092 | 0.000 | 0.011 | 0.117 | 0.184 |        |    |
| 19 | PP50: Difficulty Sleeping                                   | No                 | 1,107 | 0.788 | 0.788 | 0.788 | 0.772 | 0.797 | 0.797 | -21.37 | 74 |
|    |                                                             | Yes                | 297   | 0.212 | 0.212 | 0.212 | 0.228 | 0.203 | 0.203 |        |    |
| 20 | PP51: How Much Sleep?                                       | Slight             | 153   | 0.520 | 0.521 | 0.444 | 0.374 | 0.620 | 0.626 | -24.46 | 75 |
|    |                                                             | 2 hr               | 91    | 0.310 | 0.310 | 0.212 | 0.458 | 0.345 | 0.228 |        |    |
|    |                                                             | < 2 hr             | 12    | 0.041 | 0.041 | 0.000 | 0.009 | 0.035 | 0.089 |        |    |
|    |                                                             | Excessive          | 38    | 0.129 | 0.128 | 0.343 | 0.160 | 0.000 | 0.057 |        |    |
| 21 | Overall mMMS GATE                                           | No answers         | 660   | 0.375 | 0.384 | 0.170 | 0.114 | 0.091 | 0.769 | 416.21 | 29 |
|    |                                                             | Any answers        | 1,098 | 0.625 | 0.616 | 0.830 | 0.886 | 0.909 | 0.231 |        |    |
| 22 | SS01: mMMS RECODE                                           | 0-19               | 331   | 0.304 | 0.273 | 0.000 | 0.042 | 0.000 | 1.000 | 825.18 | 14 |
|    |                                                             | 20-29              | 275   | 0.253 | 0.267 | 0.067 | 0.591 | 0.322 | 0.000 |        |    |
|    |                                                             | 30-39              | 353   | 0.324 | 0.338 | 0.465 | 0.351 | 0.619 | 0.000 |        |    |
|    |                                                             | 40+                | 129   | 0.119 | 0.122 | 0.468 | 0.017 | 0.059 | 0.000 |        |    |
| 23 | SS02: mMMS - Orientation: RECODE                            | 0                  | 242   | 0.220 | 0.213 | 0.000 | 0.000 | 0.000 | 0.813 | 599.84 | 19 |
|    |                                                             | 1-5                | 605   | 0.551 | 0.556 | 0.284 | 0.859 | 0.862 | 0.187 |        |    |
|    |                                                             | >5                 | 252   | 0.229 | 0.231 | 0.716 | 0.141 | 0.138 | 0.000 |        |    |
| 24 | SS03: mMMS - Registration                                   | 0                  | 135   | 0.123 | 0.125 | 0.000 | 0.000 | 0.000 | 0.478 | 311.43 | 30 |
|    |                                                             | 1                  | 75    | 0.068 | 0.069 | 0.000 | 0.073 | 0.002 | 0.173 |        |    |
|    |                                                             | 2                  | 121   | 0.110 | 0.111 | 0.027 | 0.168 | 0.069 | 0.141 |        |    |
|    |                                                             | 3                  | 768   | 0.699 | 0.695 | 0.973 | 0.759 | 0.929 | 0.208 |        |    |
| 25 | SS07: mMMS - serial 7s, WORLD, and Add coins                | 0                  | 547   | 0.499 | 0.477 | 0.095 | 0.608 | 0.000 | 1.000 | 466.02 | 27 |
|    |                                                             | 1                  | 142   | 0.130 | 0.134 | 0.142 | 0.218 | 0.165 | 0.000 |        |    |
|    |                                                             | 2                  | 83    | 0.076 | 0.079 | 0.104 | 0.076 | 0.159 | 0.000 |        |    |
|    |                                                             | 3                  | 65    | 0.059 | 0.062 | 0.091 | 0.038 | 0.150 | 0.000 |        |    |
|    |                                                             | 4                  | 55    | 0.050 | 0.052 | 0.074 | 0.021 | 0.147 | 0.000 |        |    |
|    |                                                             | 5                  | 72    | 0.066 | 0.069 | 0.157 | 0.010 | 0.158 | 0.000 |        |    |
|    |                                                             | 6                  | 77    | 0.070 | 0.074 | 0.188 | 0.023 | 0.128 | 0.000 |        |    |
|    |                                                             | 7                  | 55    | 0.050 | 0.053 | 0.149 | 0.005 | 0.094 | 0.000 |        |    |
| 26 | SS09: mMMS - Recall 3-word memory                           | 0                  | 948   | 0.863 | 0.861 | 0.742 | 0.906 | 0.738 | 1.000 | 28.68  | 50 |
|    |                                                             | 1                  | 121   | 0.110 | 0.111 | 0.244 | 0.074 | 0.169 | 0.000 |        |    |
|    |                                                             | 2                  | 27    | 0.025 | 0.025 | 0.013 | 0.020 | 0.079 | 0.000 |        |    |
|    |                                                             | 3                  | 3     | 0.003 | 0.003 | 0.000 | 0.000 | 0.014 | 0.000 |        |    |
| 27 | SS11: mMMS - repeat 2 phrases, 3-stage command, read & obey | 0                  | 130   | 0.119 | 0.114 | 0.000 | 0.000 | 0.000 | 0.437 | 552.55 | 22 |
|    |                                                             | 1                  | 77    | 0.071 | 0.069 | 0.000 | 0.028 | 0.000 | 0.228 |        |    |
|    |                                                             | 2                  | 76    | 0.070 | 0.070 | 0.000 | 0.086 | 0.000 | 0.161 |        |    |
|    |                                                             | 3                  | 76    | 0.070 | 0.069 | 0.011 | 0.074 | 0.028 | 0.144 |        |    |
|    |                                                             | 4                  | 118   | 0.108 | 0.112 | 0.047 | 0.236 | 0.091 | 0.030 |        |    |
|    |                                                             | 5                  | 177   | 0.162 | 0.164 | 0.172 | 0.226 | 0.272 | 0.000 |        |    |
|    |                                                             | 6                  | 206   | 0.189 | 0.190 | 0.245 | 0.220 | 0.332 | 0.000 |        |    |
|    |                                                             | 7                  | 232   | 0.212 | 0.213 | 0.524 | 0.130 | 0.277 | 0.000 |        |    |
| 28 | SS12: mMMS - circle, diamond, cube                          | 0                  | 639   | 0.586 | 0.578 | 0.220 | 0.735 | 0.170 | 1.000 | 293.41 | 31 |
|    |                                                             | 1                  | 307   | 0.282 | 0.287 | 0.515 | 0.213 | 0.527 | 0.000 |        |    |
|    |                                                             | 2                  | 144   | 0.132 | 0.135 | 0.265 | 0.052 | 0.303 | 0.000 |        |    |

|    |                                           |                       |       |       |       |       |       |       |       |         |    |
|----|-------------------------------------------|-----------------------|-------|-------|-------|-------|-------|-------|-------|---------|----|
| 29 | CC08: Living Status                       | Home                  | 841   | 0.593 | 0.573 | 0.999 | 0.934 | 0.180 | 0.289 | 549.49  | 23 |
|    |                                           | Retirement Home       | 30    | 0.021 | 0.020 | 0.000 | 0.055 | 0.022 | 0.004 |         |    |
|    |                                           | Nursing Home          | 468   | 0.330 | 0.348 | 0.000 | 0.000 | 0.663 | 0.622 |         |    |
|    |                                           | Hospital              | 2     | 0.001 | 0.001 | 0.001 | 0.000 | 0.000 | 0.003 |         |    |
|    |                                           | Rehabilitation Center | 44    | 0.031 | 0.033 | 0.000 | 0.000 | 0.036 | 0.070 |         |    |
|    | Other                                     | 33                    | 0.023 | 0.024 | 0.000 | 0.011 | 0.099 | 0.013 |       |         |    |
| 30 | Periods since entered nursing home RECODE | 0-4                   | 226   | 0.470 | 0.447 | 0.863 | 1.000 | 0.414 | 0.335 | 8.62    | 57 |
|    |                                           | 5-9                   | 156   | 0.324 | 0.338 | 0.137 | 0.000 | 0.339 | 0.412 |         |    |
|    |                                           | 10-14                 | 76    | 0.158 | 0.165 | 0.000 | 0.000 | 0.158 | 0.206 |         |    |
|    |                                           | 15-19                 | 20    | 0.042 | 0.044 | 0.000 | 0.000 | 0.068 | 0.044 |         |    |
|    |                                           | 20+                   | 3     | 0.006 | 0.007 | 0.000 | 0.000 | 0.022 | 0.002 |         |    |
| 31 | NN01: Patient Trouble With Chores         | None                  | 85    | 0.060 | 0.061 | 0.216 | 0.067 | 0.026 | 0.000 | 552.99  | 21 |
|    |                                           | Some                  | 319   | 0.225 | 0.228 | 0.737 | 0.278 | 0.131 | 0.000 |         |    |
|    |                                           | A Lot                 | 1,012 | 0.715 | 0.712 | 0.048 | 0.655 | 0.843 | 1.000 |         |    |
| 32 | NN02: Patient Trouble Handling Money      | None                  | 123   | 0.087 | 0.089 | 0.360 | 0.072 | 0.035 | 0.000 | 532.52  | 24 |
|    |                                           | Some                  | 238   | 0.168 | 0.173 | 0.526 | 0.174 | 0.194 | 0.000 |         |    |
|    |                                           | A Lot                 | 1,055 | 0.745 | 0.738 | 0.113 | 0.754 | 0.771 | 1.000 |         |    |
| 33 | NN03: Patient Trouble Remembering Lists   | None                  | 13    | 0.009 | 0.009 | 0.046 | 0.005 | 0.000 | 0.000 | 198.59  | 33 |
|    |                                           | Some                  | 128   | 0.090 | 0.092 | 0.411 | 0.038 | 0.055 | 0.000 |         |    |
|    |                                           | A Lot                 | 1,275 | 0.900 | 0.899 | 0.543 | 0.957 | 0.945 | 1.000 |         |    |
| 34 | NN04: Patient Trouble Around House        | None                  | 675   | 0.477 | 0.473 | 1.000 | 0.702 | 0.623 | 0.000 | 994.48  | 7  |
|    |                                           | Some                  | 227   | 0.160 | 0.165 | 0.000 | 0.298 | 0.262 | 0.101 |         |    |
|    |                                           | A Lot                 | 514   | 0.363 | 0.362 | 0.000 | 0.000 | 0.115 | 0.899 |         |    |
| 35 | NN05: Patient Trouble Around Neighborhood | None                  | 332   | 0.234 | 0.236 | 0.868 | 0.282 | 0.038 | 0.000 | 863.88  | 13 |
|    |                                           | Some                  | 215   | 0.152 | 0.161 | 0.132 | 0.300 | 0.328 | 0.000 |         |    |
|    |                                           | A Lot                 | 869   | 0.614 | 0.603 | 0.000 | 0.419 | 0.634 | 1.000 |         |    |
| 36 | NN06: Patient Trouble Recognizing Place   | None                  | 636   | 0.449 | 0.447 | 0.978 | 0.715 | 0.467 | 0.000 | 920.73  | 11 |
|    |                                           | Some                  | 219   | 0.155 | 0.157 | 0.022 | 0.285 | 0.300 | 0.065 |         |    |
|    |                                           | A Lot                 | 561   | 0.396 | 0.396 | 0.000 | 0.000 | 0.233 | 0.935 |         |    |
| 37 | NN07: Patient Trouble Remembering Things  | None                  | 25    | 0.018 | 0.018 | 0.073 | 0.018 | 0.000 | 0.000 | 179.77  | 36 |
|    |                                           | Some                  | 158   | 0.112 | 0.112 | 0.373 | 0.128 | 0.066 | 0.000 |         |    |
|    |                                           | A Lot                 | 1,233 | 0.871 | 0.871 | 0.554 | 0.855 | 0.934 | 1.000 |         |    |
| 38 | NN08: Patient Dwell in the Past           | None                  | 950   | 0.671 | 0.673 | 0.587 | 0.517 | 0.566 | 0.873 | 70.11   | 44 |
|    |                                           | Some                  | 256   | 0.181 | 0.180 | 0.309 | 0.277 | 0.224 | 0.031 |         |    |
|    |                                           | A Lot                 | 209   | 0.148 | 0.147 | 0.105 | 0.207 | 0.210 | 0.096 |         |    |
| 39 | NN09: Patient Eating                      | Eats Cleanly          | 892   | 0.629 | 0.601 | 0.995 | 0.834 | 0.980 | 0.087 | 782.06  | 17 |
|    |                                           | Eats Messy            | 215   | 0.152 | 0.159 | 0.005 | 0.166 | 0.020 | 0.284 |         |    |
|    |                                           | Eats Solids           | 48    | 0.034 | 0.037 | 0.000 | 0.000 | 0.000 | 0.097 |         |    |
|    |                                           | Has to be Fed         | 263   | 0.185 | 0.203 | 0.000 | 0.000 | 0.000 | 0.532 |         |    |
| 40 | NN10: Patient Dressing                    | Dress No Help         | 446   | 0.315 | 0.312 | 0.886 | 0.388 | 0.296 | 0.003 | 1145.59 | 2  |
|    |                                           | Misses Details        | 234   | 0.165 | 0.169 | 0.114 | 0.280 | 0.428 | 0.000 |         |    |
|    |                                           | Gets Mixed Up         | 208   | 0.147 | 0.149 | 0.000 | 0.332 | 0.209 | 0.059 |         |    |
|    |                                           | Unable to Dress       | 530   | 0.374 | 0.370 | 0.000 | 0.000 | 0.068 | 0.938 |         |    |
| 41 | NN11: Patient Bladder and Bowel Control   | Never Wets Bed        | 806   | 0.568 | 0.551 | 1.000 | 0.940 | 0.657 | 0.018 | 930.83  | 9  |
|    |                                           | Occasionally Wets     | 155   | 0.109 | 0.112 | 0.000 | 0.060 | 0.225 | 0.152 |         |    |
|    |                                           | Frequently Wets       | 131   | 0.092 | 0.096 | 0.000 | 0.000 | 0.118 | 0.201 |         |    |
|    |                                           | Incontinent           | 326   | 0.230 | 0.241 | 0.000 | 0.000 | 0.000 | 0.630 |         |    |
| 42 | RR01: Needs Reminders                     | No                    | 42    | 0.030 | 0.030 | 0.144 | 0.018 | 0.000 | 0.000 | 95.17   | 39 |
|    |                                           | Occasionally          | 32    | 0.023 | 0.023 | 0.107 | 0.016 | 0.000 | 0.000 |         |    |
|    |                                           | Frequently            | 1,344 | 0.948 | 0.947 | 0.750 | 0.966 | 1.000 | 1.000 |         |    |
| 43 | RR02: Needs Help to Remember              | No                    | 23    | 0.016 | 0.016 | 0.061 | 0.020 | 0.000 | 0.000 | 76.96   | 42 |
|    |                                           | Occasionally          | 39    | 0.028 | 0.028 | 0.158 | 0.000 | 0.000 | 0.000 |         |    |
|    |                                           | Frequently            | 1,356 | 0.956 | 0.956 | 0.781 | 0.980 | 1.000 | 1.000 |         |    |
| 44 | RR03: Needs Help Finding Things           | No                    | 39    | 0.028 | 0.028 | 0.122 | 0.023 | 0.000 | 0.000 | 40.99   | 46 |
|    |                                           | Yes                   | 1,379 | 0.972 | 0.972 | 0.878 | 0.977 | 1.000 | 1.000 |         |    |
| 45 | RR04: Needs Household Chores Done         | No                    | 206   | 0.145 | 0.157 | 0.785 | 0.072 | 0.000 | 0.000 | 504.90  | 26 |
|    |                                           | Yes                   | 1,212 | 0.855 | 0.843 | 0.215 | 0.928 | 1.000 | 1.000 |         |    |
| 46 | RR05: Needs Watching When Awake           | No                    | 508   | 0.358 | 0.359 | 1.000 | 0.446 | 0.180 | 0.084 | 529.54  | 25 |
|    |                                           | Yes                   | 911   | 0.642 | 0.641 | 0.000 | 0.554 | 0.820 | 0.916 |         |    |

|    |                                                      |                                                                   |                                      |                                                    |                                                    |                                                    |                                                    |                                                    |                                                    |         |    |
|----|------------------------------------------------------|-------------------------------------------------------------------|--------------------------------------|----------------------------------------------------|----------------------------------------------------|----------------------------------------------------|----------------------------------------------------|----------------------------------------------------|----------------------------------------------------|---------|----|
| 47 | RR06: Needs to be Escorted When Outside              | No<br>Yes                                                         | 346<br>1,072                         | 0.244<br>0.756                                     | 0.251<br>0.749                                     | 0.972<br>0.028                                     | 0.292<br>0.708                                     | 0.006<br>0.994                                     | 0.000<br>1.000                                     | 673.48  | 18 |
| 48 | RR07: Needs to be Accompanied Bathing/Eating         | No<br>Yes                                                         | 578<br>841                           | 0.407<br>0.593                                     | 0.424<br>0.576                                     | 1.000<br>0.000                                     | 0.811<br>0.189                                     | 0.157<br>0.843                                     | 0.000<br>1.000                                     | 873.07  | 12 |
| 49 | RR08: Needs to be Dressed/Washed/Groomed             | No<br>Yes                                                         | 745<br>674                           | 0.525<br>0.475                                     | 0.558<br>0.442                                     | 1.000<br>0.000                                     | 1.000<br>0.000                                     | 0.645<br>0.355                                     | 0.000<br>1.000                                     | 996.30  | 5  |
| 50 | RR09: Needs to be Taken to Toilet                    | No<br>Yes                                                         | 891<br>528                           | 0.628<br>0.372                                     | 0.613<br>0.387                                     | 1.000<br>0.000                                     | 1.000<br>0.000                                     | 0.942<br>0.058                                     | 0.014<br>0.986                                     | 994.54  | 6  |
| 51 | RR10: Needs to be Fed                                | No<br>Yes                                                         | 1,123<br>296                         | 0.791<br>0.209                                     | 0.771<br>0.229                                     | 1.000<br>0.000                                     | 1.000<br>0.000                                     | 1.000<br>0.000                                     | 0.401<br>0.599                                     | 569.43  | 20 |
| 52 | RR11: Needs to be Turned/Moved/Transferred           | No<br>Yes                                                         | 1,171<br>248                         | 0.825<br>0.175                                     | 0.811<br>0.189                                     | 1.000<br>0.000                                     | 1.000<br>0.000                                     | 1.000<br>0.000                                     | 0.505<br>0.495                                     | 465.84  | 28 |
| 53 | RR12: Needs to Wear Diaper/Catheter                  | No<br>Yes                                                         | 998<br>421                           | 0.703<br>0.297                                     | 0.679<br>0.321                                     | 1.000<br>0.000                                     | 1.000<br>0.000                                     | 1.000<br>0.000                                     | 0.162<br>0.838                                     | 803.70  | 15 |
| 54 | RR13: Needs to be Tube Fed                           | No<br>Yes                                                         | 1,389<br>30                          | 0.979<br>0.021                                     | 0.979<br>0.021                                     | 1.000<br>0.000                                     | 1.000<br>0.000                                     | 1.000<br>0.000                                     | 0.944<br>0.056                                     | 29.76   | 49 |
| 55 | RR14: Dependence Level                               | Level 0<br>Level 1<br>Level 2<br>Level 3<br>Level 4<br>Level 5    | 14<br>12<br>271<br>420<br>260<br>442 | 0.010<br>0.008<br>0.191<br>0.296<br>0.183<br>0.311 | 0.010<br>0.009<br>0.195<br>0.303<br>0.183<br>0.301 | 0.032<br>0.044<br>0.854<br>0.070<br>0.000<br>0.000 | 0.010<br>0.003<br>0.169<br>0.662<br>0.155<br>0.000 | 0.000<br>0.000<br>0.000<br>0.645<br>0.355<br>0.000 | 0.005<br>0.000<br>0.000<br>0.000<br>0.210<br>0.786 | 1342.45 | 1  |
| 56 | RR15: Equivalent Institutional Service               | Limited Home Care<br>Adult Home<br>Health Related Facility        | 215<br>442<br>758                    | 0.152<br>0.312<br>0.536                            | 0.147<br>0.320<br>0.533                            | 0.699<br>0.301<br>0.000                            | 0.091<br>0.874<br>0.035                            | 0.000<br>0.125<br>0.875                            | 0.000<br>0.012<br>0.988                            | 1070.89 | 3  |
| 57 | Neurologist Estimation of Illness (No. of INTERVALS) | 0-4<br>5-9<br>10-14<br>15-19<br>20+                               | 68<br>380<br>485<br>381<br>334       | 0.041<br>0.231<br>0.294<br>0.231<br>0.203          | 0.039<br>0.221<br>0.299<br>0.237<br>0.205          | 0.159<br>0.666<br>0.175<br>0.000<br>0.000          | 0.016<br>0.239<br>0.565<br>0.181<br>0.000          | 0.043<br>0.259<br>0.474<br>0.224<br>0.000          | 0.000<br>0.000<br>0.103<br>0.383<br>0.514          | 997.37  | 4  |
| 58 | KK16: Had Seizure?                                   | No<br>Yes                                                         | 1,308<br>43                          | 0.968<br>0.032                                     | 0.968<br>0.032                                     | 0.986<br>0.014                                     | 0.984<br>0.016                                     | 1.000<br>0.000                                     | 0.933<br>0.067                                     | 1.51    | 58 |
| 59 | KK17: First Time Seizure?                            | No<br>Yes                                                         | 22<br>19                             | 0.537<br>0.463                                     | 0.546<br>0.454                                     | 0.680<br>0.320                                     | 0.367<br>0.633                                     | 0.000<br>1.000                                     | 0.632<br>0.368                                     | -6.74   | 63 |
| 60 | Periods since seizures began RECODE                  | 0-4<br>5-9<br>9-14<br>15+                                         | 95<br>44<br>20<br>7                  | 0.572<br>0.265<br>0.120<br>0.042                   | 0.572<br>0.266<br>0.121<br>0.042                   | 0.874<br>0.126<br>0.000<br>0.000                   | 0.700<br>0.212<br>0.088<br>0.000                   | 1.000<br>0.000<br>0.000<br>0.000                   | 0.484<br>0.311<br>0.147<br>0.059                   | -30.86  | 77 |
| 61 | KK19: How Frequently Do Seizures Occur?              | One per Month<br>2-5 per Month<br>6-10 per Month<br>>10 per Month | 26<br>2<br>1<br>1                    | 0.867<br>0.067<br>0.033<br>0.033                   | 0.872<br>0.068<br>0.029<br>0.030                   | 1.000<br>0.000<br>0.000<br>0.000                   | 0.680<br>0.000<br>0.000<br>0.320                   | 0.397<br>0.000<br>0.603<br>0.000                   | 0.916<br>0.084<br>0.000<br>0.000                   | -24.68  | 76 |
| 62 | FF10: Adequate Sight?                                | No<br>Yes                                                         | 53<br>408                            | 0.115<br>0.885                                     | 0.115<br>0.885                                     | 0.175<br>0.825                                     | 0.034<br>0.966                                     | 0.083<br>0.917                                     | 0.194<br>0.806                                     | -8.56   | 64 |
| 63 | JJ17A: Beer/Week: RECODE                             | 0<br>1-7<br>>7                                                    | 1,341<br>5<br>1                      | 0.996<br>0.004<br>0.001                            | 0.996<br>0.004<br>0.001                            | 0.987<br>0.013<br>0.000                            | 0.992<br>0.005<br>0.003                            | 1.000<br>0.000<br>0.000                            | 1.000<br>0.000<br>0.000                            | -33.12  | 78 |
| 64 | JJ17B: Wine/Week: RECODE                             | 0<br>1-7<br>>7                                                    | 1,284<br>60<br>3                     | 0.953<br>0.045<br>0.002                            | 0.953<br>0.044<br>0.002                            | 0.894<br>0.106<br>0.000                            | 0.896<br>0.096<br>0.008                            | 1.000<br>0.000<br>0.000                            | 1.000<br>0.000<br>0.000                            | 15.31   | 55 |
| 65 | JJ17C: Hard Liquor/Week: RECODE                      | 0<br>1-7<br>>7                                                    | 1,288<br>52<br>7                     | 0.956<br>0.039<br>0.005                            | 0.956<br>0.039<br>0.005                            | 0.904<br>0.096<br>0.000                            | 0.899<br>0.082<br>0.019                            | 1.000<br>0.000<br>0.000                            | 1.000<br>0.000<br>0.000                            | 35.15   | 48 |
| 66 | JJ17D: All Alcoholic Drinks/Week: RECODE             | 0<br>1-7<br>>7                                                    | 1,238<br>102<br>16                   | 0.913<br>0.075<br>0.012                            | 0.912<br>0.076<br>0.012                            | 0.830<br>0.157<br>0.012                            | 0.788<br>0.176<br>0.036                            | 1.000<br>0.000<br>0.000                            | 1.000<br>0.000<br>0.000                            | 87.00   | 40 |
| 67 | EF1: Hypertension                                    | No<br>Yes                                                         | 1,217<br>7                           | 0.994<br>0.006                                     | 0.994<br>0.006                                     | 1.000<br>0.000                                     | 0.990<br>0.010                                     | 0.982<br>0.018                                     | 1.000<br>0.000                                     | -14.85  | 67 |
| 68 | EF2: Diabetes                                        | No                                                                | 1,226                                | 0.998                                              | 0.998                                              | 1.000                                              | 1.000                                              | 0.990                                              | 1.000                                              | -16.61  | 71 |

| |

|Yes

|

2

0.002

0.002

0.000

0.000

0.010

0.000

|

|       |                                             |         |         |        |        |        |        |        |        |           |    |
|-------|---------------------------------------------|---------|---------|--------|--------|--------|--------|--------|--------|-----------|----|
| 69    | EF4: Heart Disease                          | No      | 1,216   | 0.991  | 0.991  | 0.995  | 1.000  | 0.980  | 0.989  | -15.79    | 69 |
|       |                                             | Yes     | 11      | 0.009  | 0.009  | 0.005  | 0.000  | 0.020  | 0.011  |           |    |
| 70    | EF5: Stroke                                 | No      | 871     | 0.992  | 0.992  | 1.000  | 1.000  | 0.991  | 0.986  | -16.33    | 70 |
|       |                                             | Yes     | 7       | 0.008  | 0.008  | 0.000  | 0.000  | 0.009  | 0.014  |           |    |
| 71    | EF5A: TIA                                   | No      | 41      | 0.891  | 0.919  | 1.000  | 0.000  | 1.000  | 1.000  | 0.19      | 61 |
|       |                                             | Yes     | 5       | 0.109  | 0.081  | 0.000  | 1.000  | 0.000  | 0.000  |           |    |
| 72    | EF6: Surgery                                | No      | 1,185   | 0.967  | 0.967  | 0.971  | 0.946  | 0.989  | 0.971  | -19.47    | 73 |
|       |                                             | Yes     | 40      | 0.033  | 0.033  | 0.029  | 0.054  | 0.011  | 0.029  |           |    |
| 73    | EF7: Admission to Hospital                  | No      | 1,107   | 0.899  | 0.899  | 0.938  | 0.917  | 0.886  | 0.879  | -17.16    | 72 |
|       |                                             | Yes     | 125     | 0.101  | 0.101  | 0.062  | 0.083  | 0.114  | 0.121  |           |    |
| 74    | EF8: Treatment                              | No      | 1,046   | 0.858  | 0.858  | 0.959  | 0.944  | 0.856  | 0.770  | 21.96     | 52 |
|       |                                             | Yes     | 173     | 0.142  | 0.142  | 0.041  | 0.056  | 0.144  | 0.230  |           |    |
| 75    | NNTOT: Total dependence scale score: RECODE | 0-5     | 108     | 0.076  | 0.077  | 0.348  | 0.058  | 0.000  | 0.000  | 973.40    | 8  |
|       |                                             | 6-10    | 358     | 0.253  | 0.258  | 0.609  | 0.318  | 0.380  | 0.000  |           |    |
|       |                                             | 11-15   | 410     | 0.290  | 0.296  | 0.044  | 0.590  | 0.511  | 0.105  |           |    |
|       |                                             | >15     | 538     | 0.380  | 0.369  | 0.000  | 0.034  | 0.109  | 0.895  |           |    |
| 76    | DELUSION: Delusions                         | Absent  | 841     | 0.603  | 0.607  | 0.736  | 0.277  | 0.498  | 0.839  | 119.70    | 37 |
|       |                                             | Present | 554     | 0.397  | 0.393  | 0.264  | 0.723  | 0.502  | 0.161  |           |    |
| 77    | HALLUCIN: Hallucinations                    | Absent  | 1,254   | 0.899  | 0.899  | 0.998  | 0.757  | 0.949  | 0.934  | 36.68     | 47 |
|       |                                             | Present | 141     | 0.101  | 0.101  | 0.002  | 0.243  | 0.051  | 0.066  |           |    |
| 78    | ILLUSION: Illusions                         | Absent  | 1,352   | 0.970  | 0.970  | 1.000  | 0.928  | 1.000  | 0.973  | 1.08      | 59 |
|       |                                             | Present | 42      | 0.030  | 0.030  | 0.000  | 0.072  | 0.000  | 0.027  |           |    |
| 79    | EPSXS: Moderate extrapyramidal symptoms     | Absent  | 648     | 0.695  | 0.693  | 1.000  | 0.858  | 0.564  | 0.240  | 189.81    | 34 |
|       |                                             | Present | 285     | 0.305  | 0.307  | 0.000  | 0.142  | 0.436  | 0.760  |           |    |
| Total |                                             |         | 100,235 | 79.000 | 79.000 | 79.000 | 79.000 | 79.000 | 79.000 | 24,981.80 |    |

Web Table A5: Model Selection Criteria for Sex-Specific Validation of 3-D Model Using the Predictors 2 Data

| Model          | I   | J  | M   | M-J | df    | N*  | N** | ln(N*) | ln(N**) | Log-Likelihood | Model Selection Criterion |                  |                  |                  | Deviation from Minimum Value of Criterion |             |             |             |
|----------------|-----|----|-----|-----|-------|-----|-----|--------|---------|----------------|---------------------------|------------------|------------------|------------------|-------------------------------------------|-------------|-------------|-------------|
|                |     |    |     |     |       |     |     |        |         |                | AIC                       | BIC1             | BIC2             | CAIC             | ΔAIC                                      | ΔBIC1       | ΔBIC2       | ΔCAIC       |
| <b>Males</b>   |     |    |     |     |       |     |     |        |         |                |                           |                  |                  |                  |                                           |             |             |             |
| F1             | 106 | 80 | 224 | 144 | 318   | 563 | 422 | 6.33   | 6.04    | -29,826.86     | 60,289.72                 | 61,667.73        | 61,575.95        | 61,985.73        | 5,443.37                                  | 2,933.85    | 2,933.85    | 2,357.85    |
| F2             | 106 | 80 | 224 | 144 | 894   | 563 | 508 | 6.33   | 6.23    | -26,535.93     | 54,859.87                 | <b>58,733.88</b> | <b>58,642.11</b> | <b>59,627.88</b> | 13.51                                     | <b>0.00</b> | <b>0.00</b> | <b>0.00</b> |
| F3             | 106 | 80 | 224 | 144 | 984   | 563 | 651 | 6.33   | 6.48    | -26,439.18     | <b>54,846.36</b>          | 59,110.37        | 59,252.82        | 60,094.37        | <b>0.00</b>                               | 376.49      | 610.72      | 466.49      |
| <b>Females</b> |     |    |     |     |       |     |     |        |         |                |                           |                  |                  |                  |                                           |             |             |             |
| F1             | 148 | 79 | 228 | 149 | 444   | 728 | 401 | 6.59   | 5.99    | -40,215.92     | 81,319.84                 | 83,358.20        | 83,093.37        | 83,802.20        | 5,642.40                                  | 2,906.22    | 2,906.22    | 2,310.22    |
| F2             | 148 | 79 | 228 | 149 | 1,040 | 728 | 565 | 6.59   | 6.34    | -36,798.72     | <b>75,677.45</b>          | <b>80,451.98</b> | <b>80,187.14</b> | <b>81,491.98</b> | <b>0.00</b>                               | <b>0.00</b> | <b>0.00</b> | <b>0.00</b> |
| F3             | 148 | 79 | 228 | 149 | 1,130 | 728 | 704 | 6.59   | 6.56    | -36,733.72     | 75,727.45                 | 80,915.16        | 80,877.00        | 82,045.16        | 50.00                                     | 463.18      | 689.86      | 553.18      |

**Notes**

$df = I \times D + K \times (M - J) + T \times D \times K / 2$ , where  $D = 3$ ,  $K = 4$ , and  $T \equiv \max(t) = 15$ , is the time index for the last follow-up examination.

$N^*$  is the  $df$ -weighted geometric mean number of responses to the  $J$  variables.

$N^{**}$  is the geometric mean number of additive terms in the formulas for the  $df$  diagonal elements of the  $df \times df$  Hessian matrix of the Log-Likelihood function.

AIC =  $-2 \times \text{Log-Likelihood} + 2 \times df$ ; see Akaike (1973).

BIC1 =  $-2 \times \text{Log-Likelihood} + df \times \ln(N^*)$ ; see Schwarz (1978).

BIC2 =  $-2 \times \text{Log-Likelihood} + df \times \ln(N^{**})$ ; see Raftery (1995).

CAIC =  $-2 \times \text{Log-Likelihood} + df \times \ln(N^*) + df$ ; CAIC is a mnemonic for "consistent" AIC – see Bozdogan (1987).

For each selection criterion, the best model has the minimum value, shown in boldface. The BIC1 and BIC2 selections were supported for females by the identical selections under AIC and CAIC, and for males by the CAIC selection. However, the  $\Delta AIC$  value favoring F3 over F2 for males was more than an order of magnitude smaller than the complementary  $\Delta AIC$  value favoring F2 over F3, indicating that strength of evidence for the AIC selection was relatively very weak.

**Web Table A6: Transition Matrices, Probabilities of Death, and 10-Year Life-Table Analysis in the 3-D Model of AD Progression in the Predictors 1 Data, Type I Males**

| Exam #                          | Type                           | Inputs to Equation (4) |        |        |        | Alternative Inputs to Equation (4) |        |        |        | 6-Month Probabilities of Death (from Table 1)                                                                                                                                                                                                                                                                                                                                                                                                                                                                                                                                                                                                                                                                                                                                                                                                                                                                                                                                                                                                                                                                                                                                                                                                                                                                                                                                                                                                                                                                                                                                                                                                                                                                                                                                                                                                                                                                                                                                                                                                                                                                                                                                                                                                                                                                                                                                                |                                |        |        |        |  |      |   |    |     |    |       |       |       |       |       |                                 |  |  |  |  |        |   |    |     |    |   |        |        |        |        |   |        |        |        |        |   |        |        |        |        |   |        |        |        |        |   |        |        |        |        |   |        |        |        |        |   |        |        |        |        |   |        |        |        |        |   |        |        |        |        |    |        |        |        |        |    |        |        |        |        |    |        |        |        |        |    |        |        |        |        |    |        |        |        |        |    |        |        |        |        |    |        |        |        |        |    |        |        |        |        |    |        |        |        |        |    |        |        |        |        |    |        |        |        |        |    |        |        |        |        |
|---------------------------------|--------------------------------|------------------------|--------|--------|--------|------------------------------------|--------|--------|--------|----------------------------------------------------------------------------------------------------------------------------------------------------------------------------------------------------------------------------------------------------------------------------------------------------------------------------------------------------------------------------------------------------------------------------------------------------------------------------------------------------------------------------------------------------------------------------------------------------------------------------------------------------------------------------------------------------------------------------------------------------------------------------------------------------------------------------------------------------------------------------------------------------------------------------------------------------------------------------------------------------------------------------------------------------------------------------------------------------------------------------------------------------------------------------------------------------------------------------------------------------------------------------------------------------------------------------------------------------------------------------------------------------------------------------------------------------------------------------------------------------------------------------------------------------------------------------------------------------------------------------------------------------------------------------------------------------------------------------------------------------------------------------------------------------------------------------------------------------------------------------------------------------------------------------------------------------------------------------------------------------------------------------------------------------------------------------------------------------------------------------------------------------------------------------------------------------------------------------------------------------------------------------------------------------------------------------------------------------------------------------------------------|--------------------------------|--------|--------|--------|--|------|---|----|-----|----|-------|-------|-------|-------|-------|---------------------------------|--|--|--|--|--------|---|----|-----|----|---|--------|--------|--------|--------|---|--------|--------|--------|--------|---|--------|--------|--------|--------|---|--------|--------|--------|--------|---|--------|--------|--------|--------|---|--------|--------|--------|--------|---|--------|--------|--------|--------|---|--------|--------|--------|--------|---|--------|--------|--------|--------|----|--------|--------|--------|--------|----|--------|--------|--------|--------|----|--------|--------|--------|--------|----|--------|--------|--------|--------|----|--------|--------|--------|--------|----|--------|--------|--------|--------|----|--------|--------|--------|--------|----|--------|--------|--------|--------|----|--------|--------|--------|--------|----|--------|--------|--------|--------|----|--------|--------|--------|--------|----|--------|--------|--------|--------|
|                                 |                                | V-matrices             |        |        |        | U-matrices                         |        |        |        | Type                                                                                                                                                                                                                                                                                                                                                                                                                                                                                                                                                                                                                                                                                                                                                                                                                                                                                                                                                                                                                                                                                                                                                                                                                                                                                                                                                                                                                                                                                                                                                                                                                                                                                                                                                                                                                                                                                                                                                                                                                                                                                                                                                                                                                                                                                                                                                                                         | I                              | II     | III    | IV     |  |      |   |    |     |    |       |       |       |       |       |                                 |  |  |  |  |        |   |    |     |    |   |        |        |        |        |   |        |        |        |        |   |        |        |        |        |   |        |        |        |        |   |        |        |        |        |   |        |        |        |        |   |        |        |        |        |   |        |        |        |        |   |        |        |        |        |    |        |        |        |        |    |        |        |        |        |    |        |        |        |        |    |        |        |        |        |    |        |        |        |        |    |        |        |        |        |    |        |        |        |        |    |        |        |        |        |    |        |        |        |        |    |        |        |        |        |    |        |        |        |        |    |        |        |        |        |
|                                 |                                | I                      | II     | III    | IV     | I                                  | II     | III    | IV     | Value                                                                                                                                                                                                                                                                                                                                                                                                                                                                                                                                                                                                                                                                                                                                                                                                                                                                                                                                                                                                                                                                                                                                                                                                                                                                                                                                                                                                                                                                                                                                                                                                                                                                                                                                                                                                                                                                                                                                                                                                                                                                                                                                                                                                                                                                                                                                                                                        | 0.0091                         | 0.0179 | 0.0383 | 0.1518 |  |      |   |    |     |    |       |       |       |       |       |                                 |  |  |  |  |        |   |    |     |    |   |        |        |        |        |   |        |        |        |        |   |        |        |        |        |   |        |        |        |        |   |        |        |        |        |   |        |        |        |        |   |        |        |        |        |   |        |        |        |        |   |        |        |        |        |    |        |        |        |        |    |        |        |        |        |    |        |        |        |        |    |        |        |        |        |    |        |        |        |        |    |        |        |        |        |    |        |        |        |        |    |        |        |        |        |    |        |        |        |        |    |        |        |        |        |    |        |        |        |        |    |        |        |        |        |
| 1                               | I                              | 1.0000                 | 0.0000 | 0.0000 | 0.0000 | 1.0000                             | 0.0000 | 0.0000 | 0.0000 | <hr/> <b>Template for 10-Year Life-Table Analysis</b> <hr/> <table border="1"> <thead> <tr> <th colspan="5">Initial GoM Scores (at Exam 1)</th> </tr> <tr> <th>Type</th> <th>I</th> <th>II</th> <th>III</th> <th>IV</th> </tr> <tr> <th>Value</th> <td>1.000</td> <td>0.000</td> <td>0.000</td> <td>0.000</td> </tr> </thead> <tbody> <tr> <th colspan="5">GoM Scores by Exam (via Eqn. 4)</th> </tr> <tr> <th>Exam #</th> <th>I</th> <th>II</th> <th>III</th> <th>IV</th> </tr> <tr> <td>1</td> <td>1.0000</td> <td>0.0000</td> <td>0.0000</td> <td>0.0000</td> </tr> <tr> <td>2</td> <td>1.0000</td> <td>0.0000</td> <td>0.0000</td> <td>0.0000</td> </tr> <tr> <td>3</td> <td>1.0000</td> <td>0.0000</td> <td>0.0000</td> <td>0.0000</td> </tr> <tr> <td>4</td> <td>1.0000</td> <td>0.0000</td> <td>0.0000</td> <td>0.0000</td> </tr> <tr> <td>5</td> <td>1.0000</td> <td>0.0000</td> <td>0.0000</td> <td>0.0000</td> </tr> <tr> <td>6</td> <td>1.0000</td> <td>0.0000</td> <td>0.0000</td> <td>0.0000</td> </tr> <tr> <td>7</td> <td>1.0000</td> <td>0.0000</td> <td>0.0000</td> <td>0.0000</td> </tr> <tr> <td>8</td> <td>1.0000</td> <td>0.0000</td> <td>0.0000</td> <td>0.0000</td> </tr> <tr> <td>9</td> <td>1.0000</td> <td>0.0000</td> <td>0.0000</td> <td>0.0000</td> </tr> <tr> <td>10</td> <td>0.9743</td> <td>0.0000</td> <td>0.0257</td> <td>0.0000</td> </tr> <tr> <td>11</td> <td>0.9743</td> <td>0.0000</td> <td>0.0239</td> <td>0.0018</td> </tr> <tr> <td>12</td> <td>0.6508</td> <td>0.0000</td> <td>0.3299</td> <td>0.0193</td> </tr> <tr> <td>13</td> <td>0.6508</td> <td>0.0000</td> <td>0.3299</td> <td>0.0193</td> </tr> <tr> <td>14</td> <td>0.6508</td> <td>0.0000</td> <td>0.2026</td> <td>0.1466</td> </tr> <tr> <td>15</td> <td>0.3264</td> <td>0.0000</td> <td>0.3244</td> <td>0.3492</td> </tr> <tr> <td>16</td> <td>0.3264</td> <td>0.0000</td> <td>0.3244</td> <td>0.3492</td> </tr> <tr> <td>17</td> <td>0.3264</td> <td>0.0000</td> <td>0.2933</td> <td>0.3803</td> </tr> <tr> <td>18</td> <td>0.3264</td> <td>0.0000</td> <td>0.2933</td> <td>0.3803</td> </tr> <tr> <td>19</td> <td>0.2244</td> <td>0.0000</td> <td>0.0000</td> <td>0.7756</td> </tr> <tr> <td>20</td> <td>0.1733</td> <td>0.0000</td> <td>0.0511</td> <td>0.7756</td> </tr> <tr> <td>21</td> <td>0.0000</td> <td>0.0000</td> <td>0.0220</td> <td>0.9780</td> </tr> </tbody> </table> | Initial GoM Scores (at Exam 1) |        |        |        |  | Type | I | II | III | IV | Value | 1.000 | 0.000 | 0.000 | 0.000 | GoM Scores by Exam (via Eqn. 4) |  |  |  |  | Exam # | I | II | III | IV | 1 | 1.0000 | 0.0000 | 0.0000 | 0.0000 | 2 | 1.0000 | 0.0000 | 0.0000 | 0.0000 | 3 | 1.0000 | 0.0000 | 0.0000 | 0.0000 | 4 | 1.0000 | 0.0000 | 0.0000 | 0.0000 | 5 | 1.0000 | 0.0000 | 0.0000 | 0.0000 | 6 | 1.0000 | 0.0000 | 0.0000 | 0.0000 | 7 | 1.0000 | 0.0000 | 0.0000 | 0.0000 | 8 | 1.0000 | 0.0000 | 0.0000 | 0.0000 | 9 | 1.0000 | 0.0000 | 0.0000 | 0.0000 | 10 | 0.9743 | 0.0000 | 0.0257 | 0.0000 | 11 | 0.9743 | 0.0000 | 0.0239 | 0.0018 | 12 | 0.6508 | 0.0000 | 0.3299 | 0.0193 | 13 | 0.6508 | 0.0000 | 0.3299 | 0.0193 | 14 | 0.6508 | 0.0000 | 0.2026 | 0.1466 | 15 | 0.3264 | 0.0000 | 0.3244 | 0.3492 | 16 | 0.3264 | 0.0000 | 0.3244 | 0.3492 | 17 | 0.3264 | 0.0000 | 0.2933 | 0.3803 | 18 | 0.3264 | 0.0000 | 0.2933 | 0.3803 | 19 | 0.2244 | 0.0000 | 0.0000 | 0.7756 | 20 | 0.1733 | 0.0000 | 0.0511 | 0.7756 | 21 | 0.0000 | 0.0000 | 0.0220 | 0.9780 |
|                                 | Initial GoM Scores (at Exam 1) |                        |        |        |        |                                    |        |        |        |                                                                                                                                                                                                                                                                                                                                                                                                                                                                                                                                                                                                                                                                                                                                                                                                                                                                                                                                                                                                                                                                                                                                                                                                                                                                                                                                                                                                                                                                                                                                                                                                                                                                                                                                                                                                                                                                                                                                                                                                                                                                                                                                                                                                                                                                                                                                                                                              |                                |        |        |        |  |      |   |    |     |    |       |       |       |       |       |                                 |  |  |  |  |        |   |    |     |    |   |        |        |        |        |   |        |        |        |        |   |        |        |        |        |   |        |        |        |        |   |        |        |        |        |   |        |        |        |        |   |        |        |        |        |   |        |        |        |        |   |        |        |        |        |    |        |        |        |        |    |        |        |        |        |    |        |        |        |        |    |        |        |        |        |    |        |        |        |        |    |        |        |        |        |    |        |        |        |        |    |        |        |        |        |    |        |        |        |        |    |        |        |        |        |    |        |        |        |        |    |        |        |        |        |
|                                 | Type                           | I                      | II     | III    | IV     |                                    |        |        |        |                                                                                                                                                                                                                                                                                                                                                                                                                                                                                                                                                                                                                                                                                                                                                                                                                                                                                                                                                                                                                                                                                                                                                                                                                                                                                                                                                                                                                                                                                                                                                                                                                                                                                                                                                                                                                                                                                                                                                                                                                                                                                                                                                                                                                                                                                                                                                                                              |                                |        |        |        |  |      |   |    |     |    |       |       |       |       |       |                                 |  |  |  |  |        |   |    |     |    |   |        |        |        |        |   |        |        |        |        |   |        |        |        |        |   |        |        |        |        |   |        |        |        |        |   |        |        |        |        |   |        |        |        |        |   |        |        |        |        |   |        |        |        |        |    |        |        |        |        |    |        |        |        |        |    |        |        |        |        |    |        |        |        |        |    |        |        |        |        |    |        |        |        |        |    |        |        |        |        |    |        |        |        |        |    |        |        |        |        |    |        |        |        |        |    |        |        |        |        |    |        |        |        |        |
|                                 | Value                          | 1.000                  | 0.000  | 0.000  | 0.000  |                                    |        |        |        |                                                                                                                                                                                                                                                                                                                                                                                                                                                                                                                                                                                                                                                                                                                                                                                                                                                                                                                                                                                                                                                                                                                                                                                                                                                                                                                                                                                                                                                                                                                                                                                                                                                                                                                                                                                                                                                                                                                                                                                                                                                                                                                                                                                                                                                                                                                                                                                              |                                |        |        |        |  |      |   |    |     |    |       |       |       |       |       |                                 |  |  |  |  |        |   |    |     |    |   |        |        |        |        |   |        |        |        |        |   |        |        |        |        |   |        |        |        |        |   |        |        |        |        |   |        |        |        |        |   |        |        |        |        |   |        |        |        |        |   |        |        |        |        |    |        |        |        |        |    |        |        |        |        |    |        |        |        |        |    |        |        |        |        |    |        |        |        |        |    |        |        |        |        |    |        |        |        |        |    |        |        |        |        |    |        |        |        |        |    |        |        |        |        |    |        |        |        |        |    |        |        |        |        |
| GoM Scores by Exam (via Eqn. 4) |                                |                        |        |        |        |                                    |        |        |        |                                                                                                                                                                                                                                                                                                                                                                                                                                                                                                                                                                                                                                                                                                                                                                                                                                                                                                                                                                                                                                                                                                                                                                                                                                                                                                                                                                                                                                                                                                                                                                                                                                                                                                                                                                                                                                                                                                                                                                                                                                                                                                                                                                                                                                                                                                                                                                                              |                                |        |        |        |  |      |   |    |     |    |       |       |       |       |       |                                 |  |  |  |  |        |   |    |     |    |   |        |        |        |        |   |        |        |        |        |   |        |        |        |        |   |        |        |        |        |   |        |        |        |        |   |        |        |        |        |   |        |        |        |        |   |        |        |        |        |   |        |        |        |        |    |        |        |        |        |    |        |        |        |        |    |        |        |        |        |    |        |        |        |        |    |        |        |        |        |    |        |        |        |        |    |        |        |        |        |    |        |        |        |        |    |        |        |        |        |    |        |        |        |        |    |        |        |        |        |    |        |        |        |        |
| Exam #                          | I                              | II                     | III    | IV     |        |                                    |        |        |        |                                                                                                                                                                                                                                                                                                                                                                                                                                                                                                                                                                                                                                                                                                                                                                                                                                                                                                                                                                                                                                                                                                                                                                                                                                                                                                                                                                                                                                                                                                                                                                                                                                                                                                                                                                                                                                                                                                                                                                                                                                                                                                                                                                                                                                                                                                                                                                                              |                                |        |        |        |  |      |   |    |     |    |       |       |       |       |       |                                 |  |  |  |  |        |   |    |     |    |   |        |        |        |        |   |        |        |        |        |   |        |        |        |        |   |        |        |        |        |   |        |        |        |        |   |        |        |        |        |   |        |        |        |        |   |        |        |        |        |   |        |        |        |        |    |        |        |        |        |    |        |        |        |        |    |        |        |        |        |    |        |        |        |        |    |        |        |        |        |    |        |        |        |        |    |        |        |        |        |    |        |        |        |        |    |        |        |        |        |    |        |        |        |        |    |        |        |        |        |    |        |        |        |        |
| 1                               | 1.0000                         | 0.0000                 | 0.0000 | 0.0000 |        |                                    |        |        |        |                                                                                                                                                                                                                                                                                                                                                                                                                                                                                                                                                                                                                                                                                                                                                                                                                                                                                                                                                                                                                                                                                                                                                                                                                                                                                                                                                                                                                                                                                                                                                                                                                                                                                                                                                                                                                                                                                                                                                                                                                                                                                                                                                                                                                                                                                                                                                                                              |                                |        |        |        |  |      |   |    |     |    |       |       |       |       |       |                                 |  |  |  |  |        |   |    |     |    |   |        |        |        |        |   |        |        |        |        |   |        |        |        |        |   |        |        |        |        |   |        |        |        |        |   |        |        |        |        |   |        |        |        |        |   |        |        |        |        |   |        |        |        |        |    |        |        |        |        |    |        |        |        |        |    |        |        |        |        |    |        |        |        |        |    |        |        |        |        |    |        |        |        |        |    |        |        |        |        |    |        |        |        |        |    |        |        |        |        |    |        |        |        |        |    |        |        |        |        |    |        |        |        |        |
| 2                               | 1.0000                         | 0.0000                 | 0.0000 | 0.0000 |        |                                    |        |        |        |                                                                                                                                                                                                                                                                                                                                                                                                                                                                                                                                                                                                                                                                                                                                                                                                                                                                                                                                                                                                                                                                                                                                                                                                                                                                                                                                                                                                                                                                                                                                                                                                                                                                                                                                                                                                                                                                                                                                                                                                                                                                                                                                                                                                                                                                                                                                                                                              |                                |        |        |        |  |      |   |    |     |    |       |       |       |       |       |                                 |  |  |  |  |        |   |    |     |    |   |        |        |        |        |   |        |        |        |        |   |        |        |        |        |   |        |        |        |        |   |        |        |        |        |   |        |        |        |        |   |        |        |        |        |   |        |        |        |        |   |        |        |        |        |    |        |        |        |        |    |        |        |        |        |    |        |        |        |        |    |        |        |        |        |    |        |        |        |        |    |        |        |        |        |    |        |        |        |        |    |        |        |        |        |    |        |        |        |        |    |        |        |        |        |    |        |        |        |        |    |        |        |        |        |
| 3                               | 1.0000                         | 0.0000                 | 0.0000 | 0.0000 |        |                                    |        |        |        |                                                                                                                                                                                                                                                                                                                                                                                                                                                                                                                                                                                                                                                                                                                                                                                                                                                                                                                                                                                                                                                                                                                                                                                                                                                                                                                                                                                                                                                                                                                                                                                                                                                                                                                                                                                                                                                                                                                                                                                                                                                                                                                                                                                                                                                                                                                                                                                              |                                |        |        |        |  |      |   |    |     |    |       |       |       |       |       |                                 |  |  |  |  |        |   |    |     |    |   |        |        |        |        |   |        |        |        |        |   |        |        |        |        |   |        |        |        |        |   |        |        |        |        |   |        |        |        |        |   |        |        |        |        |   |        |        |        |        |   |        |        |        |        |    |        |        |        |        |    |        |        |        |        |    |        |        |        |        |    |        |        |        |        |    |        |        |        |        |    |        |        |        |        |    |        |        |        |        |    |        |        |        |        |    |        |        |        |        |    |        |        |        |        |    |        |        |        |        |    |        |        |        |        |
| 4                               | 1.0000                         | 0.0000                 | 0.0000 | 0.0000 |        |                                    |        |        |        |                                                                                                                                                                                                                                                                                                                                                                                                                                                                                                                                                                                                                                                                                                                                                                                                                                                                                                                                                                                                                                                                                                                                                                                                                                                                                                                                                                                                                                                                                                                                                                                                                                                                                                                                                                                                                                                                                                                                                                                                                                                                                                                                                                                                                                                                                                                                                                                              |                                |        |        |        |  |      |   |    |     |    |       |       |       |       |       |                                 |  |  |  |  |        |   |    |     |    |   |        |        |        |        |   |        |        |        |        |   |        |        |        |        |   |        |        |        |        |   |        |        |        |        |   |        |        |        |        |   |        |        |        |        |   |        |        |        |        |   |        |        |        |        |    |        |        |        |        |    |        |        |        |        |    |        |        |        |        |    |        |        |        |        |    |        |        |        |        |    |        |        |        |        |    |        |        |        |        |    |        |        |        |        |    |        |        |        |        |    |        |        |        |        |    |        |        |        |        |    |        |        |        |        |
| 5                               | 1.0000                         | 0.0000                 | 0.0000 | 0.0000 |        |                                    |        |        |        |                                                                                                                                                                                                                                                                                                                                                                                                                                                                                                                                                                                                                                                                                                                                                                                                                                                                                                                                                                                                                                                                                                                                                                                                                                                                                                                                                                                                                                                                                                                                                                                                                                                                                                                                                                                                                                                                                                                                                                                                                                                                                                                                                                                                                                                                                                                                                                                              |                                |        |        |        |  |      |   |    |     |    |       |       |       |       |       |                                 |  |  |  |  |        |   |    |     |    |   |        |        |        |        |   |        |        |        |        |   |        |        |        |        |   |        |        |        |        |   |        |        |        |        |   |        |        |        |        |   |        |        |        |        |   |        |        |        |        |   |        |        |        |        |    |        |        |        |        |    |        |        |        |        |    |        |        |        |        |    |        |        |        |        |    |        |        |        |        |    |        |        |        |        |    |        |        |        |        |    |        |        |        |        |    |        |        |        |        |    |        |        |        |        |    |        |        |        |        |    |        |        |        |        |
| 6                               | 1.0000                         | 0.0000                 | 0.0000 | 0.0000 |        |                                    |        |        |        |                                                                                                                                                                                                                                                                                                                                                                                                                                                                                                                                                                                                                                                                                                                                                                                                                                                                                                                                                                                                                                                                                                                                                                                                                                                                                                                                                                                                                                                                                                                                                                                                                                                                                                                                                                                                                                                                                                                                                                                                                                                                                                                                                                                                                                                                                                                                                                                              |                                |        |        |        |  |      |   |    |     |    |       |       |       |       |       |                                 |  |  |  |  |        |   |    |     |    |   |        |        |        |        |   |        |        |        |        |   |        |        |        |        |   |        |        |        |        |   |        |        |        |        |   |        |        |        |        |   |        |        |        |        |   |        |        |        |        |   |        |        |        |        |    |        |        |        |        |    |        |        |        |        |    |        |        |        |        |    |        |        |        |        |    |        |        |        |        |    |        |        |        |        |    |        |        |        |        |    |        |        |        |        |    |        |        |        |        |    |        |        |        |        |    |        |        |        |        |    |        |        |        |        |
| 7                               | 1.0000                         | 0.0000                 | 0.0000 | 0.0000 |        |                                    |        |        |        |                                                                                                                                                                                                                                                                                                                                                                                                                                                                                                                                                                                                                                                                                                                                                                                                                                                                                                                                                                                                                                                                                                                                                                                                                                                                                                                                                                                                                                                                                                                                                                                                                                                                                                                                                                                                                                                                                                                                                                                                                                                                                                                                                                                                                                                                                                                                                                                              |                                |        |        |        |  |      |   |    |     |    |       |       |       |       |       |                                 |  |  |  |  |        |   |    |     |    |   |        |        |        |        |   |        |        |        |        |   |        |        |        |        |   |        |        |        |        |   |        |        |        |        |   |        |        |        |        |   |        |        |        |        |   |        |        |        |        |   |        |        |        |        |    |        |        |        |        |    |        |        |        |        |    |        |        |        |        |    |        |        |        |        |    |        |        |        |        |    |        |        |        |        |    |        |        |        |        |    |        |        |        |        |    |        |        |        |        |    |        |        |        |        |    |        |        |        |        |    |        |        |        |        |
| 8                               | 1.0000                         | 0.0000                 | 0.0000 | 0.0000 |        |                                    |        |        |        |                                                                                                                                                                                                                                                                                                                                                                                                                                                                                                                                                                                                                                                                                                                                                                                                                                                                                                                                                                                                                                                                                                                                                                                                                                                                                                                                                                                                                                                                                                                                                                                                                                                                                                                                                                                                                                                                                                                                                                                                                                                                                                                                                                                                                                                                                                                                                                                              |                                |        |        |        |  |      |   |    |     |    |       |       |       |       |       |                                 |  |  |  |  |        |   |    |     |    |   |        |        |        |        |   |        |        |        |        |   |        |        |        |        |   |        |        |        |        |   |        |        |        |        |   |        |        |        |        |   |        |        |        |        |   |        |        |        |        |   |        |        |        |        |    |        |        |        |        |    |        |        |        |        |    |        |        |        |        |    |        |        |        |        |    |        |        |        |        |    |        |        |        |        |    |        |        |        |        |    |        |        |        |        |    |        |        |        |        |    |        |        |        |        |    |        |        |        |        |    |        |        |        |        |
| 9                               | 1.0000                         | 0.0000                 | 0.0000 | 0.0000 |        |                                    |        |        |        |                                                                                                                                                                                                                                                                                                                                                                                                                                                                                                                                                                                                                                                                                                                                                                                                                                                                                                                                                                                                                                                                                                                                                                                                                                                                                                                                                                                                                                                                                                                                                                                                                                                                                                                                                                                                                                                                                                                                                                                                                                                                                                                                                                                                                                                                                                                                                                                              |                                |        |        |        |  |      |   |    |     |    |       |       |       |       |       |                                 |  |  |  |  |        |   |    |     |    |   |        |        |        |        |   |        |        |        |        |   |        |        |        |        |   |        |        |        |        |   |        |        |        |        |   |        |        |        |        |   |        |        |        |        |   |        |        |        |        |   |        |        |        |        |    |        |        |        |        |    |        |        |        |        |    |        |        |        |        |    |        |        |        |        |    |        |        |        |        |    |        |        |        |        |    |        |        |        |        |    |        |        |        |        |    |        |        |        |        |    |        |        |        |        |    |        |        |        |        |    |        |        |        |        |
| 10                              | 0.9743                         | 0.0000                 | 0.0257 | 0.0000 |        |                                    |        |        |        |                                                                                                                                                                                                                                                                                                                                                                                                                                                                                                                                                                                                                                                                                                                                                                                                                                                                                                                                                                                                                                                                                                                                                                                                                                                                                                                                                                                                                                                                                                                                                                                                                                                                                                                                                                                                                                                                                                                                                                                                                                                                                                                                                                                                                                                                                                                                                                                              |                                |        |        |        |  |      |   |    |     |    |       |       |       |       |       |                                 |  |  |  |  |        |   |    |     |    |   |        |        |        |        |   |        |        |        |        |   |        |        |        |        |   |        |        |        |        |   |        |        |        |        |   |        |        |        |        |   |        |        |        |        |   |        |        |        |        |   |        |        |        |        |    |        |        |        |        |    |        |        |        |        |    |        |        |        |        |    |        |        |        |        |    |        |        |        |        |    |        |        |        |        |    |        |        |        |        |    |        |        |        |        |    |        |        |        |        |    |        |        |        |        |    |        |        |        |        |    |        |        |        |        |
| 11                              | 0.9743                         | 0.0000                 | 0.0239 | 0.0018 |        |                                    |        |        |        |                                                                                                                                                                                                                                                                                                                                                                                                                                                                                                                                                                                                                                                                                                                                                                                                                                                                                                                                                                                                                                                                                                                                                                                                                                                                                                                                                                                                                                                                                                                                                                                                                                                                                                                                                                                                                                                                                                                                                                                                                                                                                                                                                                                                                                                                                                                                                                                              |                                |        |        |        |  |      |   |    |     |    |       |       |       |       |       |                                 |  |  |  |  |        |   |    |     |    |   |        |        |        |        |   |        |        |        |        |   |        |        |        |        |   |        |        |        |        |   |        |        |        |        |   |        |        |        |        |   |        |        |        |        |   |        |        |        |        |   |        |        |        |        |    |        |        |        |        |    |        |        |        |        |    |        |        |        |        |    |        |        |        |        |    |        |        |        |        |    |        |        |        |        |    |        |        |        |        |    |        |        |        |        |    |        |        |        |        |    |        |        |        |        |    |        |        |        |        |    |        |        |        |        |
| 12                              | 0.6508                         | 0.0000                 | 0.3299 | 0.0193 |        |                                    |        |        |        |                                                                                                                                                                                                                                                                                                                                                                                                                                                                                                                                                                                                                                                                                                                                                                                                                                                                                                                                                                                                                                                                                                                                                                                                                                                                                                                                                                                                                                                                                                                                                                                                                                                                                                                                                                                                                                                                                                                                                                                                                                                                                                                                                                                                                                                                                                                                                                                              |                                |        |        |        |  |      |   |    |     |    |       |       |       |       |       |                                 |  |  |  |  |        |   |    |     |    |   |        |        |        |        |   |        |        |        |        |   |        |        |        |        |   |        |        |        |        |   |        |        |        |        |   |        |        |        |        |   |        |        |        |        |   |        |        |        |        |   |        |        |        |        |    |        |        |        |        |    |        |        |        |        |    |        |        |        |        |    |        |        |        |        |    |        |        |        |        |    |        |        |        |        |    |        |        |        |        |    |        |        |        |        |    |        |        |        |        |    |        |        |        |        |    |        |        |        |        |    |        |        |        |        |
| 13                              | 0.6508                         | 0.0000                 | 0.3299 | 0.0193 |        |                                    |        |        |        |                                                                                                                                                                                                                                                                                                                                                                                                                                                                                                                                                                                                                                                                                                                                                                                                                                                                                                                                                                                                                                                                                                                                                                                                                                                                                                                                                                                                                                                                                                                                                                                                                                                                                                                                                                                                                                                                                                                                                                                                                                                                                                                                                                                                                                                                                                                                                                                              |                                |        |        |        |  |      |   |    |     |    |       |       |       |       |       |                                 |  |  |  |  |        |   |    |     |    |   |        |        |        |        |   |        |        |        |        |   |        |        |        |        |   |        |        |        |        |   |        |        |        |        |   |        |        |        |        |   |        |        |        |        |   |        |        |        |        |   |        |        |        |        |    |        |        |        |        |    |        |        |        |        |    |        |        |        |        |    |        |        |        |        |    |        |        |        |        |    |        |        |        |        |    |        |        |        |        |    |        |        |        |        |    |        |        |        |        |    |        |        |        |        |    |        |        |        |        |    |        |        |        |        |
| 14                              | 0.6508                         | 0.0000                 | 0.2026 | 0.1466 |        |                                    |        |        |        |                                                                                                                                                                                                                                                                                                                                                                                                                                                                                                                                                                                                                                                                                                                                                                                                                                                                                                                                                                                                                                                                                                                                                                                                                                                                                                                                                                                                                                                                                                                                                                                                                                                                                                                                                                                                                                                                                                                                                                                                                                                                                                                                                                                                                                                                                                                                                                                              |                                |        |        |        |  |      |   |    |     |    |       |       |       |       |       |                                 |  |  |  |  |        |   |    |     |    |   |        |        |        |        |   |        |        |        |        |   |        |        |        |        |   |        |        |        |        |   |        |        |        |        |   |        |        |        |        |   |        |        |        |        |   |        |        |        |        |   |        |        |        |        |    |        |        |        |        |    |        |        |        |        |    |        |        |        |        |    |        |        |        |        |    |        |        |        |        |    |        |        |        |        |    |        |        |        |        |    |        |        |        |        |    |        |        |        |        |    |        |        |        |        |    |        |        |        |        |    |        |        |        |        |
| 15                              | 0.3264                         | 0.0000                 | 0.3244 | 0.3492 |        |                                    |        |        |        |                                                                                                                                                                                                                                                                                                                                                                                                                                                                                                                                                                                                                                                                                                                                                                                                                                                                                                                                                                                                                                                                                                                                                                                                                                                                                                                                                                                                                                                                                                                                                                                                                                                                                                                                                                                                                                                                                                                                                                                                                                                                                                                                                                                                                                                                                                                                                                                              |                                |        |        |        |  |      |   |    |     |    |       |       |       |       |       |                                 |  |  |  |  |        |   |    |     |    |   |        |        |        |        |   |        |        |        |        |   |        |        |        |        |   |        |        |        |        |   |        |        |        |        |   |        |        |        |        |   |        |        |        |        |   |        |        |        |        |   |        |        |        |        |    |        |        |        |        |    |        |        |        |        |    |        |        |        |        |    |        |        |        |        |    |        |        |        |        |    |        |        |        |        |    |        |        |        |        |    |        |        |        |        |    |        |        |        |        |    |        |        |        |        |    |        |        |        |        |    |        |        |        |        |
| 16                              | 0.3264                         | 0.0000                 | 0.3244 | 0.3492 |        |                                    |        |        |        |                                                                                                                                                                                                                                                                                                                                                                                                                                                                                                                                                                                                                                                                                                                                                                                                                                                                                                                                                                                                                                                                                                                                                                                                                                                                                                                                                                                                                                                                                                                                                                                                                                                                                                                                                                                                                                                                                                                                                                                                                                                                                                                                                                                                                                                                                                                                                                                              |                                |        |        |        |  |      |   |    |     |    |       |       |       |       |       |                                 |  |  |  |  |        |   |    |     |    |   |        |        |        |        |   |        |        |        |        |   |        |        |        |        |   |        |        |        |        |   |        |        |        |        |   |        |        |        |        |   |        |        |        |        |   |        |        |        |        |   |        |        |        |        |    |        |        |        |        |    |        |        |        |        |    |        |        |        |        |    |        |        |        |        |    |        |        |        |        |    |        |        |        |        |    |        |        |        |        |    |        |        |        |        |    |        |        |        |        |    |        |        |        |        |    |        |        |        |        |    |        |        |        |        |
| 17                              | 0.3264                         | 0.0000                 | 0.2933 | 0.3803 |        |                                    |        |        |        |                                                                                                                                                                                                                                                                                                                                                                                                                                                                                                                                                                                                                                                                                                                                                                                                                                                                                                                                                                                                                                                                                                                                                                                                                                                                                                                                                                                                                                                                                                                                                                                                                                                                                                                                                                                                                                                                                                                                                                                                                                                                                                                                                                                                                                                                                                                                                                                              |                                |        |        |        |  |      |   |    |     |    |       |       |       |       |       |                                 |  |  |  |  |        |   |    |     |    |   |        |        |        |        |   |        |        |        |        |   |        |        |        |        |   |        |        |        |        |   |        |        |        |        |   |        |        |        |        |   |        |        |        |        |   |        |        |        |        |   |        |        |        |        |    |        |        |        |        |    |        |        |        |        |    |        |        |        |        |    |        |        |        |        |    |        |        |        |        |    |        |        |        |        |    |        |        |        |        |    |        |        |        |        |    |        |        |        |        |    |        |        |        |        |    |        |        |        |        |    |        |        |        |        |
| 18                              | 0.3264                         | 0.0000                 | 0.2933 | 0.3803 |        |                                    |        |        |        |                                                                                                                                                                                                                                                                                                                                                                                                                                                                                                                                                                                                                                                                                                                                                                                                                                                                                                                                                                                                                                                                                                                                                                                                                                                                                                                                                                                                                                                                                                                                                                                                                                                                                                                                                                                                                                                                                                                                                                                                                                                                                                                                                                                                                                                                                                                                                                                              |                                |        |        |        |  |      |   |    |     |    |       |       |       |       |       |                                 |  |  |  |  |        |   |    |     |    |   |        |        |        |        |   |        |        |        |        |   |        |        |        |        |   |        |        |        |        |   |        |        |        |        |   |        |        |        |        |   |        |        |        |        |   |        |        |        |        |   |        |        |        |        |    |        |        |        |        |    |        |        |        |        |    |        |        |        |        |    |        |        |        |        |    |        |        |        |        |    |        |        |        |        |    |        |        |        |        |    |        |        |        |        |    |        |        |        |        |    |        |        |        |        |    |        |        |        |        |    |        |        |        |        |
| 19                              | 0.2244                         | 0.0000                 | 0.0000 | 0.7756 |        |                                    |        |        |        |                                                                                                                                                                                                                                                                                                                                                                                                                                                                                                                                                                                                                                                                                                                                                                                                                                                                                                                                                                                                                                                                                                                                                                                                                                                                                                                                                                                                                                                                                                                                                                                                                                                                                                                                                                                                                                                                                                                                                                                                                                                                                                                                                                                                                                                                                                                                                                                              |                                |        |        |        |  |      |   |    |     |    |       |       |       |       |       |                                 |  |  |  |  |        |   |    |     |    |   |        |        |        |        |   |        |        |        |        |   |        |        |        |        |   |        |        |        |        |   |        |        |        |        |   |        |        |        |        |   |        |        |        |        |   |        |        |        |        |   |        |        |        |        |    |        |        |        |        |    |        |        |        |        |    |        |        |        |        |    |        |        |        |        |    |        |        |        |        |    |        |        |        |        |    |        |        |        |        |    |        |        |        |        |    |        |        |        |        |    |        |        |        |        |    |        |        |        |        |    |        |        |        |        |
| 20                              | 0.1733                         | 0.0000                 | 0.0511 | 0.7756 |        |                                    |        |        |        |                                                                                                                                                                                                                                                                                                                                                                                                                                                                                                                                                                                                                                                                                                                                                                                                                                                                                                                                                                                                                                                                                                                                                                                                                                                                                                                                                                                                                                                                                                                                                                                                                                                                                                                                                                                                                                                                                                                                                                                                                                                                                                                                                                                                                                                                                                                                                                                              |                                |        |        |        |  |      |   |    |     |    |       |       |       |       |       |                                 |  |  |  |  |        |   |    |     |    |   |        |        |        |        |   |        |        |        |        |   |        |        |        |        |   |        |        |        |        |   |        |        |        |        |   |        |        |        |        |   |        |        |        |        |   |        |        |        |        |   |        |        |        |        |    |        |        |        |        |    |        |        |        |        |    |        |        |        |        |    |        |        |        |        |    |        |        |        |        |    |        |        |        |        |    |        |        |        |        |    |        |        |        |        |    |        |        |        |        |    |        |        |        |        |    |        |        |        |        |    |        |        |        |        |
| 21                              | 0.0000                         | 0.0000                 | 0.0220 | 0.9780 |        |                                    |        |        |        |                                                                                                                                                                                                                                                                                                                                                                                                                                                                                                                                                                                                                                                                                                                                                                                                                                                                                                                                                                                                                                                                                                                                                                                                                                                                                                                                                                                                                                                                                                                                                                                                                                                                                                                                                                                                                                                                                                                                                                                                                                                                                                                                                                                                                                                                                                                                                                                              |                                |        |        |        |  |      |   |    |     |    |       |       |       |       |       |                                 |  |  |  |  |        |   |    |     |    |   |        |        |        |        |   |        |        |        |        |   |        |        |        |        |   |        |        |        |        |   |        |        |        |        |   |        |        |        |        |   |        |        |        |        |   |        |        |        |        |   |        |        |        |        |    |        |        |        |        |    |        |        |        |        |    |        |        |        |        |    |        |        |        |        |    |        |        |        |        |    |        |        |        |        |    |        |        |        |        |    |        |        |        |        |    |        |        |        |        |    |        |        |        |        |    |        |        |        |        |    |        |        |        |        |
| 2                               | I                              | 1.0000                 | 0.0000 | 0.0000 | 0.0000 | 1.0000                             | 0.0000 | 0.0000 | 0.0000 |                                                                                                                                                                                                                                                                                                                                                                                                                                                                                                                                                                                                                                                                                                                                                                                                                                                                                                                                                                                                                                                                                                                                                                                                                                                                                                                                                                                                                                                                                                                                                                                                                                                                                                                                                                                                                                                                                                                                                                                                                                                                                                                                                                                                                                                                                                                                                                                              |                                |        |        |        |  |      |   |    |     |    |       |       |       |       |       |                                 |  |  |  |  |        |   |    |     |    |   |        |        |        |        |   |        |        |        |        |   |        |        |        |        |   |        |        |        |        |   |        |        |        |        |   |        |        |        |        |   |        |        |        |        |   |        |        |        |        |   |        |        |        |        |    |        |        |        |        |    |        |        |        |        |    |        |        |        |        |    |        |        |        |        |    |        |        |        |        |    |        |        |        |        |    |        |        |        |        |    |        |        |        |        |    |        |        |        |        |    |        |        |        |        |    |        |        |        |        |    |        |        |        |        |
|                                 | II                             | 0.0000                 | 1.0000 | 0.0000 | 0.0000 | 0.0000                             | 1.0000 | 0.0000 | 0.0000 |                                                                                                                                                                                                                                                                                                                                                                                                                                                                                                                                                                                                                                                                                                                                                                                                                                                                                                                                                                                                                                                                                                                                                                                                                                                                                                                                                                                                                                                                                                                                                                                                                                                                                                                                                                                                                                                                                                                                                                                                                                                                                                                                                                                                                                                                                                                                                                                              |                                |        |        |        |  |      |   |    |     |    |       |       |       |       |       |                                 |  |  |  |  |        |   |    |     |    |   |        |        |        |        |   |        |        |        |        |   |        |        |        |        |   |        |        |        |        |   |        |        |        |        |   |        |        |        |        |   |        |        |        |        |   |        |        |        |        |   |        |        |        |        |    |        |        |        |        |    |        |        |        |        |    |        |        |        |        |    |        |        |        |        |    |        |        |        |        |    |        |        |        |        |    |        |        |        |        |    |        |        |        |        |    |        |        |        |        |    |        |        |        |        |    |        |        |        |        |    |        |        |        |        |
|                                 | III                            | 0.0000                 | 0.0000 | 1.0000 | 0.0000 | 0.0000                             | 0.0000 | 1.0000 | 0.0000 |                                                                                                                                                                                                                                                                                                                                                                                                                                                                                                                                                                                                                                                                                                                                                                                                                                                                                                                                                                                                                                                                                                                                                                                                                                                                                                                                                                                                                                                                                                                                                                                                                                                                                                                                                                                                                                                                                                                                                                                                                                                                                                                                                                                                                                                                                                                                                                                              |                                |        |        |        |  |      |   |    |     |    |       |       |       |       |       |                                 |  |  |  |  |        |   |    |     |    |   |        |        |        |        |   |        |        |        |        |   |        |        |        |        |   |        |        |        |        |   |        |        |        |        |   |        |        |        |        |   |        |        |        |        |   |        |        |        |        |   |        |        |        |        |    |        |        |        |        |    |        |        |        |        |    |        |        |        |        |    |        |        |        |        |    |        |        |        |        |    |        |        |        |        |    |        |        |        |        |    |        |        |        |        |    |        |        |        |        |    |        |        |        |        |    |        |        |        |        |    |        |        |        |        |
|                                 | IV                             | 0.0000                 | 0.0000 | 0.0000 | 1.0000 | 0.0000                             | 0.0000 | 0.0000 | 1.0000 |                                                                                                                                                                                                                                                                                                                                                                                                                                                                                                                                                                                                                                                                                                                                                                                                                                                                                                                                                                                                                                                                                                                                                                                                                                                                                                                                                                                                                                                                                                                                                                                                                                                                                                                                                                                                                                                                                                                                                                                                                                                                                                                                                                                                                                                                                                                                                                                              |                                |        |        |        |  |      |   |    |     |    |       |       |       |       |       |                                 |  |  |  |  |        |   |    |     |    |   |        |        |        |        |   |        |        |        |        |   |        |        |        |        |   |        |        |        |        |   |        |        |        |        |   |        |        |        |        |   |        |        |        |        |   |        |        |        |        |   |        |        |        |        |    |        |        |        |        |    |        |        |        |        |    |        |        |        |        |    |        |        |        |        |    |        |        |        |        |    |        |        |        |        |    |        |        |        |        |    |        |        |        |        |    |        |        |        |        |    |        |        |        |        |    |        |        |        |        |    |        |        |        |        |
| 3                               | I                              | 1.0000                 | 0.0000 | 0.0000 | 0.0000 | 1.0000                             | 0.0000 | 0.0000 | 0.0000 |                                                                                                                                                                                                                                                                                                                                                                                                                                                                                                                                                                                                                                                                                                                                                                                                                                                                                                                                                                                                                                                                                                                                                                                                                                                                                                                                                                                                                                                                                                                                                                                                                                                                                                                                                                                                                                                                                                                                                                                                                                                                                                                                                                                                                                                                                                                                                                                              |                                |        |        |        |  |      |   |    |     |    |       |       |       |       |       |                                 |  |  |  |  |        |   |    |     |    |   |        |        |        |        |   |        |        |        |        |   |        |        |        |        |   |        |        |        |        |   |        |        |        |        |   |        |        |        |        |   |        |        |        |        |   |        |        |        |        |   |        |        |        |        |    |        |        |        |        |    |        |        |        |        |    |        |        |        |        |    |        |        |        |        |    |        |        |        |        |    |        |        |        |        |    |        |        |        |        |    |        |        |        |        |    |        |        |        |        |    |        |        |        |        |    |        |        |        |        |    |        |        |        |        |
|                                 | II                             | 0.0000                 | 1.0000 | 0.0000 | 0.0000 | 0.0000                             | 0.9378 | 0.0622 | 0.0000 |                                                                                                                                                                                                                                                                                                                                                                                                                                                                                                                                                                                                                                                                                                                                                                                                                                                                                                                                                                                                                                                                                                                                                                                                                                                                                                                                                                                                                                                                                                                                                                                                                                                                                                                                                                                                                                                                                                                                                                                                                                                                                                                                                                                                                                                                                                                                                                                              |                                |        |        |        |  |      |   |    |     |    |       |       |       |       |       |                                 |  |  |  |  |        |   |    |     |    |   |        |        |        |        |   |        |        |        |        |   |        |        |        |        |   |        |        |        |        |   |        |        |        |        |   |        |        |        |        |   |        |        |        |        |   |        |        |        |        |   |        |        |        |        |    |        |        |        |        |    |        |        |        |        |    |        |        |        |        |    |        |        |        |        |    |        |        |        |        |    |        |        |        |        |    |        |        |        |        |    |        |        |        |        |    |        |        |        |        |    |        |        |        |        |    |        |        |        |        |    |        |        |        |        |
|                                 | III                            | 0.0000                 | 0.0000 | 1.0000 | 0.0000 | 0.0000                             | 0.0000 | 0.7385 | 0.2615 |                                                                                                                                                                                                                                                                                                                                                                                                                                                                                                                                                                                                                                                                                                                                                                                                                                                                                                                                                                                                                                                                                                                                                                                                                                                                                                                                                                                                                                                                                                                                                                                                                                                                                                                                                                                                                                                                                                                                                                                                                                                                                                                                                                                                                                                                                                                                                                                              |                                |        |        |        |  |      |   |    |     |    |       |       |       |       |       |                                 |  |  |  |  |        |   |    |     |    |   |        |        |        |        |   |        |        |        |        |   |        |        |        |        |   |        |        |        |        |   |        |        |        |        |   |        |        |        |        |   |        |        |        |        |   |        |        |        |        |   |        |        |        |        |    |        |        |        |        |    |        |        |        |        |    |        |        |        |        |    |        |        |        |        |    |        |        |        |        |    |        |        |        |        |    |        |        |        |        |    |        |        |        |        |    |        |        |        |        |    |        |        |        |        |    |        |        |        |        |    |        |        |        |        |
|                                 | IV                             | 0.0000                 | 0.0000 | 0.0000 | 1.0000 | 0.0000                             | 0.0000 | 0.0000 | 1.0000 |                                                                                                                                                                                                                                                                                                                                                                                                                                                                                                                                                                                                                                                                                                                                                                                                                                                                                                                                                                                                                                                                                                                                                                                                                                                                                                                                                                                                                                                                                                                                                                                                                                                                                                                                                                                                                                                                                                                                                                                                                                                                                                                                                                                                                                                                                                                                                                                              |                                |        |        |        |  |      |   |    |     |    |       |       |       |       |       |                                 |  |  |  |  |        |   |    |     |    |   |        |        |        |        |   |        |        |        |        |   |        |        |        |        |   |        |        |        |        |   |        |        |        |        |   |        |        |        |        |   |        |        |        |        |   |        |        |        |        |   |        |        |        |        |    |        |        |        |        |    |        |        |        |        |    |        |        |        |        |    |        |        |        |        |    |        |        |        |        |    |        |        |        |        |    |        |        |        |        |    |        |        |        |        |    |        |        |        |        |    |        |        |        |        |    |        |        |        |        |    |        |        |        |        |
| 4                               | I                              | 1.0000                 | 0.0000 | 0.0000 | 0.0000 | 1.0000                             | 0.0000 | 0.0000 | 0.0000 |                                                                                                                                                                                                                                                                                                                                                                                                                                                                                                                                                                                                                                                                                                                                                                                                                                                                                                                                                                                                                                                                                                                                                                                                                                                                                                                                                                                                                                                                                                                                                                                                                                                                                                                                                                                                                                                                                                                                                                                                                                                                                                                                                                                                                                                                                                                                                                                              |                                |        |        |        |  |      |   |    |     |    |       |       |       |       |       |                                 |  |  |  |  |        |   |    |     |    |   |        |        |        |        |   |        |        |        |        |   |        |        |        |        |   |        |        |        |        |   |        |        |        |        |   |        |        |        |        |   |        |        |        |        |   |        |        |        |        |   |        |        |        |        |    |        |        |        |        |    |        |        |        |        |    |        |        |        |        |    |        |        |        |        |    |        |        |        |        |    |        |        |        |        |    |        |        |        |        |    |        |        |        |        |    |        |        |        |        |    |        |        |        |        |    |        |        |        |        |    |        |        |        |        |
|                                 | II                             | 0.0000                 | 0.9378 | 0.0622 | 0.0000 | 0.0000                             | 1.0000 | 0.0000 | 0.0000 |                                                                                                                                                                                                                                                                                                                                                                                                                                                                                                                                                                                                                                                                                                                                                                                                                                                                                                                                                                                                                                                                                                                                                                                                                                                                                                                                                                                                                                                                                                                                                                                                                                                                                                                                                                                                                                                                                                                                                                                                                                                                                                                                                                                                                                                                                                                                                                                              |                                |        |        |        |  |      |   |    |     |    |       |       |       |       |       |                                 |  |  |  |  |        |   |    |     |    |   |        |        |        |        |   |        |        |        |        |   |        |        |        |        |   |        |        |        |        |   |        |        |        |        |   |        |        |        |        |   |        |        |        |        |   |        |        |        |        |   |        |        |        |        |    |        |        |        |        |    |        |        |        |        |    |        |        |        |        |    |        |        |        |        |    |        |        |        |        |    |        |        |        |        |    |        |        |        |        |    |        |        |        |        |    |        |        |        |        |    |        |        |        |        |    |        |        |        |        |    |        |        |        |        |
|                                 | III                            | 0.0000                 | 0.0000 | 0.7385 | 0.2615 | 0.0000                             | 0.0000 | 0.6536 | 0.3464 |                                                                                                                                                                                                                                                                                                                                                                                                                                                                                                                                                                                                                                                                                                                                                                                                                                                                                                                                                                                                                                                                                                                                                                                                                                                                                                                                                                                                                                                                                                                                                                                                                                                                                                                                                                                                                                                                                                                                                                                                                                                                                                                                                                                                                                                                                                                                                                                              |                                |        |        |        |  |      |   |    |     |    |       |       |       |       |       |                                 |  |  |  |  |        |   |    |     |    |   |        |        |        |        |   |        |        |        |        |   |        |        |        |        |   |        |        |        |        |   |        |        |        |        |   |        |        |        |        |   |        |        |        |        |   |        |        |        |        |   |        |        |        |        |    |        |        |        |        |    |        |        |        |        |    |        |        |        |        |    |        |        |        |        |    |        |        |        |        |    |        |        |        |        |    |        |        |        |        |    |        |        |        |        |    |        |        |        |        |    |        |        |        |        |    |        |        |        |        |    |        |        |        |        |
|                                 | IV                             | 0.0000                 | 0.0000 | 0.0000 | 1.0000 | 0.0000                             | 0.0000 | 0.0000 | 1.0000 |                                                                                                                                                                                                                                                                                                                                                                                                                                                                                                                                                                                                                                                                                                                                                                                                                                                                                                                                                                                                                                                                                                                                                                                                                                                                                                                                                                                                                                                                                                                                                                                                                                                                                                                                                                                                                                                                                                                                                                                                                                                                                                                                                                                                                                                                                                                                                                                              |                                |        |        |        |  |      |   |    |     |    |       |       |       |       |       |                                 |  |  |  |  |        |   |    |     |    |   |        |        |        |        |   |        |        |        |        |   |        |        |        |        |   |        |        |        |        |   |        |        |        |        |   |        |        |        |        |   |        |        |        |        |   |        |        |        |        |   |        |        |        |        |    |        |        |        |        |    |        |        |        |        |    |        |        |        |        |    |        |        |        |        |    |        |        |        |        |    |        |        |        |        |    |        |        |        |        |    |        |        |        |        |    |        |        |        |        |    |        |        |        |        |    |        |        |        |        |    |        |        |        |        |
| 5                               | I                              | 1.0000                 | 0.0000 | 0.0000 | 0.0000 | 1.0000                             | 0.0000 | 0.0000 | 0.0000 |                                                                                                                                                                                                                                                                                                                                                                                                                                                                                                                                                                                                                                                                                                                                                                                                                                                                                                                                                                                                                                                                                                                                                                                                                                                                                                                                                                                                                                                                                                                                                                                                                                                                                                                                                                                                                                                                                                                                                                                                                                                                                                                                                                                                                                                                                                                                                                                              |                                |        |        |        |  |      |   |    |     |    |       |       |       |       |       |                                 |  |  |  |  |        |   |    |     |    |   |        |        |        |        |   |        |        |        |        |   |        |        |        |        |   |        |        |        |        |   |        |        |        |        |   |        |        |        |        |   |        |        |        |        |   |        |        |        |        |   |        |        |        |        |    |        |        |        |        |    |        |        |        |        |    |        |        |        |        |    |        |        |        |        |    |        |        |        |        |    |        |        |        |        |    |        |        |        |        |    |        |        |        |        |    |        |        |        |        |    |        |        |        |        |    |        |        |        |        |    |        |        |        |        |
|                                 | II                             | 0.0000                 | 0.9378 | 0.0406 | 0.0215 | 0.0000                             | 0.1838 | 0.8162 | 0.0000 |                                                                                                                                                                                                                                                                                                                                                                                                                                                                                                                                                                                                                                                                                                                                                                                                                                                                                                                                                                                                                                                                                                                                                                                                                                                                                                                                                                                                                                                                                                                                                                                                                                                                                                                                                                                                                                                                                                                                                                                                                                                                                                                                                                                                                                                                                                                                                                                              |                                |        |        |        |  |      |   |    |     |    |       |       |       |       |       |                                 |  |  |  |  |        |   |    |     |    |   |        |        |        |        |   |        |        |        |        |   |        |        |        |        |   |        |        |        |        |   |        |        |        |        |   |        |        |        |        |   |        |        |        |        |   |        |        |        |        |   |        |        |        |        |    |        |        |        |        |    |        |        |        |        |    |        |        |        |        |    |        |        |        |        |    |        |        |        |        |    |        |        |        |        |    |        |        |        |        |    |        |        |        |        |    |        |        |        |        |    |        |        |        |        |    |        |        |        |        |    |        |        |        |        |
|                                 | III                            | 0.0000                 | 0.0000 | 0.4827 | 0.5173 | 0.0000                             | 0.0000 | 0.0000 | 1.0000 |                                                                                                                                                                                                                                                                                                                                                                                                                                                                                                                                                                                                                                                                                                                                                                                                                                                                                                                                                                                                                                                                                                                                                                                                                                                                                                                                                                                                                                                                                                                                                                                                                                                                                                                                                                                                                                                                                                                                                                                                                                                                                                                                                                                                                                                                                                                                                                                              |                                |        |        |        |  |      |   |    |     |    |       |       |       |       |       |                                 |  |  |  |  |        |   |    |     |    |   |        |        |        |        |   |        |        |        |        |   |        |        |        |        |   |        |        |        |        |   |        |        |        |        |   |        |        |        |        |   |        |        |        |        |   |        |        |        |        |   |        |        |        |        |    |        |        |        |        |    |        |        |        |        |    |        |        |        |        |    |        |        |        |        |    |        |        |        |        |    |        |        |        |        |    |        |        |        |        |    |        |        |        |        |    |        |        |        |        |    |        |        |        |        |    |        |        |        |        |    |        |        |        |        |
|                                 | IV                             | 0.0000                 | 0.0000 | 0.0000 | 1.0000 | 0.0000                             | 0.0000 | 0.0000 | 1.0000 |                                                                                                                                                                                                                                                                                                                                                                                                                                                                                                                                                                                                                                                                                                                                                                                                                                                                                                                                                                                                                                                                                                                                                                                                                                                                                                                                                                                                                                                                                                                                                                                                                                                                                                                                                                                                                                                                                                                                                                                                                                                                                                                                                                                                                                                                                                                                                                                              |                                |        |        |        |  |      |   |    |     |    |       |       |       |       |       |                                 |  |  |  |  |        |   |    |     |    |   |        |        |        |        |   |        |        |        |        |   |        |        |        |        |   |        |        |        |        |   |        |        |        |        |   |        |        |        |        |   |        |        |        |        |   |        |        |        |        |   |        |        |        |        |    |        |        |        |        |    |        |        |        |        |    |        |        |        |        |    |        |        |        |        |    |        |        |        |        |    |        |        |        |        |    |        |        |        |        |    |        |        |        |        |    |        |        |        |        |    |        |        |        |        |    |        |        |        |        |    |        |        |        |        |
| 6                               | I                              | 1.0000                 | 0.0000 | 0.0000 | 0.0000 | 1.0000                             | 0.0000 | 0.0000 | 0.0000 |                                                                                                                                                                                                                                                                                                                                                                                                                                                                                                                                                                                                                                                                                                                                                                                                                                                                                                                                                                                                                                                                                                                                                                                                                                                                                                                                                                                                                                                                                                                                                                                                                                                                                                                                                                                                                                                                                                                                                                                                                                                                                                                                                                                                                                                                                                                                                                                              |                                |        |        |        |  |      |   |    |     |    |       |       |       |       |       |                                 |  |  |  |  |        |   |    |     |    |   |        |        |        |        |   |        |        |        |        |   |        |        |        |        |   |        |        |        |        |   |        |        |        |        |   |        |        |        |        |   |        |        |        |        |   |        |        |        |        |   |        |        |        |        |    |        |        |        |        |    |        |        |        |        |    |        |        |        |        |    |        |        |        |        |    |        |        |        |        |    |        |        |        |        |    |        |        |        |        |    |        |        |        |        |    |        |        |        |        |    |        |        |        |        |    |        |        |        |        |    |        |        |        |        |
|                                 | II                             | 0.0000                 | 0.1724 | 0.7654 | 0.0622 | 0.0000                             | 0.0000 | 1.0000 | 0.0000 |                                                                                                                                                                                                                                                                                                                                                                                                                                                                                                                                                                                                                                                                                                                                                                                                                                                                                                                                                                                                                                                                                                                                                                                                                                                                                                                                                                                                                                                                                                                                                                                                                                                                                                                                                                                                                                                                                                                                                                                                                                                                                                                                                                                                                                                                                                                                                                                              |                                |        |        |        |  |      |   |    |     |    |       |       |       |       |       |                                 |  |  |  |  |        |   |    |     |    |   |        |        |        |        |   |        |        |        |        |   |        |        |        |        |   |        |        |        |        |   |        |        |        |        |   |        |        |        |        |   |        |        |        |        |   |        |        |        |        |   |        |        |        |        |    |        |        |        |        |    |        |        |        |        |    |        |        |        |        |    |        |        |        |        |    |        |        |        |        |    |        |        |        |        |    |        |        |        |        |    |        |        |        |        |    |        |        |        |        |    |        |        |        |        |    |        |        |        |        |    |        |        |        |        |
|                                 | III                            | 0.0000                 | 0.0000 | 0.0000 | 1.0000 | 0.0000                             | 0.0000 | 1.0000 | 0.0000 |                                                                                                                                                                                                                                                                                                                                                                                                                                                                                                                                                                                                                                                                                                                                                                                                                                                                                                                                                                                                                                                                                                                                                                                                                                                                                                                                                                                                                                                                                                                                                                                                                                                                                                                                                                                                                                                                                                                                                                                                                                                                                                                                                                                                                                                                                                                                                                                              |                                |        |        |        |  |      |   |    |     |    |       |       |       |       |       |                                 |  |  |  |  |        |   |    |     |    |   |        |        |        |        |   |        |        |        |        |   |        |        |        |        |   |        |        |        |        |   |        |        |        |        |   |        |        |        |        |   |        |        |        |        |   |        |        |        |        |   |        |        |        |        |    |        |        |        |        |    |        |        |        |        |    |        |        |        |        |    |        |        |        |        |    |        |        |        |        |    |        |        |        |        |    |        |        |        |        |    |        |        |        |        |    |        |        |        |        |    |        |        |        |        |    |        |        |        |        |    |        |        |        |        |
|                                 | IV                             | 0.0000                 | 0.0000 | 0.0000 | 1.0000 | 0.0000                             | 0.0000 | 0.0000 | 1.0000 |                                                                                                                                                                                                                                                                                                                                                                                                                                                                                                                                                                                                                                                                                                                                                                                                                                                                                                                                                                                                                                                                                                                                                                                                                                                                                                                                                                                                                                                                                                                                                                                                                                                                                                                                                                                                                                                                                                                                                                                                                                                                                                                                                                                                                                                                                                                                                                                              |                                |        |        |        |  |      |   |    |     |    |       |       |       |       |       |                                 |  |  |  |  |        |   |    |     |    |   |        |        |        |        |   |        |        |        |        |   |        |        |        |        |   |        |        |        |        |   |        |        |        |        |   |        |        |        |        |   |        |        |        |        |   |        |        |        |        |   |        |        |        |        |    |        |        |        |        |    |        |        |        |        |    |        |        |        |        |    |        |        |        |        |    |        |        |        |        |    |        |        |        |        |    |        |        |        |        |    |        |        |        |        |    |        |        |        |        |    |        |        |        |        |    |        |        |        |        |    |        |        |        |        |
| 7                               | I                              | 1.0000                 | 0.0000 | 0.0000 | 0.0000 | 1.0000                             | 0.0000 | 0.0000 | 0.0000 |                                                                                                                                                                                                                                                                                                                                                                                                                                                                                                                                                                                                                                                                                                                                                                                                                                                                                                                                                                                                                                                                                                                                                                                                                                                                                                                                                                                                                                                                                                                                                                                                                                                                                                                                                                                                                                                                                                                                                                                                                                                                                                                                                                                                                                                                                                                                                                                              |                                |        |        |        |  |      |   |    |     |    |       |       |       |       |       |                                 |  |  |  |  |        |   |    |     |    |   |        |        |        |        |   |        |        |        |        |   |        |        |        |        |   |        |        |        |        |   |        |        |        |        |   |        |        |        |        |   |        |        |        |        |   |        |        |        |        |   |        |        |        |        |    |        |        |        |        |    |        |        |        |        |    |        |        |        |        |    |        |        |        |        |    |        |        |        |        |    |        |        |        |        |    |        |        |        |        |    |        |        |        |        |    |        |        |        |        |    |        |        |        |        |    |        |        |        |        |    |        |        |        |        |
|                                 | II                             | 0.0000                 | 0.0000 | 0.9378 | 0.0622 | 0.0000                             | 0.0000 | 0.8988 | 0.1012 |                                                                                                                                                                                                                                                                                                                                                                                                                                                                                                                                                                                                                                                                                                                                                                                                                                                                                                                                                                                                                                                                                                                                                                                                                                                                                                                                                                                                                                                                                                                                                                                                                                                                                                                                                                                                                                                                                                                                                                                                                                                                                                                                                                                                                                                                                                                                                                                              |                                |        |        |        |  |      |   |    |     |    |       |       |       |       |       |                                 |  |  |  |  |        |   |    |     |    |   |        |        |        |        |   |        |        |        |        |   |        |        |        |        |   |        |        |        |        |   |        |        |        |        |   |        |        |        |        |   |        |        |        |        |   |        |        |        |        |   |        |        |        |        |    |        |        |        |        |    |        |        |        |        |    |        |        |        |        |    |        |        |        |        |    |        |        |        |        |    |        |        |        |        |    |        |        |        |        |    |        |        |        |        |    |        |        |        |        |    |        |        |        |        |    |        |        |        |        |    |        |        |        |        |
|                                 | III                            | 0.0000                 | 0.0000 | 0.0000 | 1.0000 | 0.0000                             | 0.0000 | 0.9553 | 0.0447 |                                                                                                                                                                                                                                                                                                                                                                                                                                                                                                                                                                                                                                                                                                                                                                                                                                                                                                                                                                                                                                                                                                                                                                                                                                                                                                                                                                                                                                                                                                                                                                                                                                                                                                                                                                                                                                                                                                                                                                                                                                                                                                                                                                                                                                                                                                                                                                                              |                                |        |        |        |  |      |   |    |     |    |       |       |       |       |       |                                 |  |  |  |  |        |   |    |     |    |   |        |        |        |        |   |        |        |        |        |   |        |        |        |        |   |        |        |        |        |   |        |        |        |        |   |        |        |        |        |   |        |        |        |        |   |        |        |        |        |   |        |        |        |        |    |        |        |        |        |    |        |        |        |        |    |        |        |        |        |    |        |        |        |        |    |        |        |        |        |    |        |        |        |        |    |        |        |        |        |    |        |        |        |        |    |        |        |        |        |    |        |        |        |        |    |        |        |        |        |    |        |        |        |        |
|                                 | IV                             | 0.0000                 | 0.0000 | 0.0000 | 1.0000 | 0.0000                             | 0.0000 | 0.0000 | 1.0000 |                                                                                                                                                                                                                                                                                                                                                                                                                                                                                                                                                                                                                                                                                                                                                                                                                                                                                                                                                                                                                                                                                                                                                                                                                                                                                                                                                                                                                                                                                                                                                                                                                                                                                                                                                                                                                                                                                                                                                                                                                                                                                                                                                                                                                                                                                                                                                                                              |                                |        |        |        |  |      |   |    |     |    |       |       |       |       |       |                                 |  |  |  |  |        |   |    |     |    |   |        |        |        |        |   |        |        |        |        |   |        |        |        |        |   |        |        |        |        |   |        |        |        |        |   |        |        |        |        |   |        |        |        |        |   |        |        |        |        |   |        |        |        |        |    |        |        |        |        |    |        |        |        |        |    |        |        |        |        |    |        |        |        |        |    |        |        |        |        |    |        |        |        |        |    |        |        |        |        |    |        |        |        |        |    |        |        |        |        |    |        |        |        |        |    |        |        |        |        |    |        |        |        |        |
| 8                               | I                              | 1.0000                 | 0.0000 | 0.0000 | 0.0000 | 1.0000                             | 0.0000 | 0.0000 | 0.0000 |                                                                                                                                                                                                                                                                                                                                                                                                                                                                                                                                                                                                                                                                                                                                                                                                                                                                                                                                                                                                                                                                                                                                                                                                                                                                                                                                                                                                                                                                                                                                                                                                                                                                                                                                                                                                                                                                                                                                                                                                                                                                                                                                                                                                                                                                                                                                                                                              |                                |        |        |        |  |      |   |    |     |    |       |       |       |       |       |                                 |  |  |  |  |        |   |    |     |    |   |        |        |        |        |   |        |        |        |        |   |        |        |        |        |   |        |        |        |        |   |        |        |        |        |   |        |        |        |        |   |        |        |        |        |   |        |        |        |        |   |        |        |        |        |    |        |        |        |        |    |        |        |        |        |    |        |        |        |        |    |        |        |        |        |    |        |        |        |        |    |        |        |        |        |    |        |        |        |        |    |        |        |        |        |    |        |        |        |        |    |        |        |        |        |    |        |        |        |        |    |        |        |        |        |
|                                 | II                             | 0.0000                 | 0.0000 | 0.8959 | 0.1041 | 0.0000                             | 0.0000 | 0.5204 | 0.4796 |                                                                                                                                                                                                                                                                                                                                                                                                                                                                                                                                                                                                                                                                                                                                                                                                                                                                                                                                                                                                                                                                                                                                                                                                                                                                                                                                                                                                                                                                                                                                                                                                                                                                                                                                                                                                                                                                                                                                                                                                                                                                                                                                                                                                                                                                                                                                                                                              |                                |        |        |        |  |      |   |    |     |    |       |       |       |       |       |                                 |  |  |  |  |        |   |    |     |    |   |        |        |        |        |   |        |        |        |        |   |        |        |        |        |   |        |        |        |        |   |        |        |        |        |   |        |        |        |        |   |        |        |        |        |   |        |        |        |        |   |        |        |        |        |    |        |        |        |        |    |        |        |        |        |    |        |        |        |        |    |        |        |        |        |    |        |        |        |        |    |        |        |        |        |    |        |        |        |        |    |        |        |        |        |    |        |        |        |        |    |        |        |        |        |    |        |        |        |        |    |        |        |        |        |
|                                 | III                            | 0.0000                 | 0.0000 | 0.0000 | 1.0000 | 0.0000                             | 0.0000 | 0.8494 | 0.1506 |                                                                                                                                                                                                                                                                                                                                                                                                                                                                                                                                                                                                                                                                                                                                                                                                                                                                                                                                                                                                                                                                                                                                                                                                                                                                                                                                                                                                                                                                                                                                                                                                                                                                                                                                                                                                                                                                                                                                                                                                                                                                                                                                                                                                                                                                                                                                                                                              |                                |        |        |        |  |      |   |    |     |    |       |       |       |       |       |                                 |  |  |  |  |        |   |    |     |    |   |        |        |        |        |   |        |        |        |        |   |        |        |        |        |   |        |        |        |        |   |        |        |        |        |   |        |        |        |        |   |        |        |        |        |   |        |        |        |        |   |        |        |        |        |    |        |        |        |        |    |        |        |        |        |    |        |        |        |        |    |        |        |        |        |    |        |        |        |        |    |        |        |        |        |    |        |        |        |        |    |        |        |        |        |    |        |        |        |        |    |        |        |        |        |    |        |        |        |        |    |        |        |        |        |
|                                 | IV                             | 0.0000                 | 0.0000 | 0.0000 | 1.0000 | 0.0000                             | 0.0000 | 0.0000 | 1.0000 |                                                                                                                                                                                                                                                                                                                                                                                                                                                                                                                                                                                                                                                                                                                                                                                                                                                                                                                                                                                                                                                                                                                                                                                                                                                                                                                                                                                                                                                                                                                                                                                                                                                                                                                                                                                                                                                                                                                                                                                                                                                                                                                                                                                                                                                                                                                                                                                              |                                |        |        |        |  |      |   |    |     |    |       |       |       |       |       |                                 |  |  |  |  |        |   |    |     |    |   |        |        |        |        |   |        |        |        |        |   |        |        |        |        |   |        |        |        |        |   |        |        |        |        |   |        |        |        |        |   |        |        |        |        |   |        |        |        |        |   |        |        |        |        |    |        |        |        |        |    |        |        |        |        |    |        |        |        |        |    |        |        |        |        |    |        |        |        |        |    |        |        |        |        |    |        |        |        |        |    |        |        |        |        |    |        |        |        |        |    |        |        |        |        |    |        |        |        |        |    |        |        |        |        |
| 9                               | I                              | 1.0000                 | 0.0000 | 0.0000 | 0.0000 | 0.9743                             | 0.0000 | 0.0257 | 0.0000 |                                                                                                                                                                                                                                                                                                                                                                                                                                                                                                                                                                                                                                                                                                                                                                                                                                                                                                                                                                                                                                                                                                                                                                                                                                                                                                                                                                                                                                                                                                                                                                                                                                                                                                                                                                                                                                                                                                                                                                                                                                                                                                                                                                                                                                                                                                                                                                                              |                                |        |        |        |  |      |   |    |     |    |       |       |       |       |       |                                 |  |  |  |  |        |   |    |     |    |   |        |        |        |        |   |        |        |        |        |   |        |        |        |        |   |        |        |        |        |   |        |        |        |        |   |        |        |        |        |   |        |        |        |        |   |        |        |        |        |   |        |        |        |        |    |        |        |        |        |    |        |        |        |        |    |        |        |        |        |    |        |        |        |        |    |        |        |        |        |    |        |        |        |        |    |        |        |        |        |    |        |        |        |        |    |        |        |        |        |    |        |        |        |        |    |        |        |        |        |    |        |        |        |        |
|                                 | II                             | 0.0000                 | 0.0000 | 0.7611 | 0.2389 | 0.0000                             | 0.0000 | 0.5913 | 0.4087 |                                                                                                                                                                                                                                                                                                                                                                                                                                                                                                                                                                                                                                                                                                                                                                                                                                                                                                                                                                                                                                                                                                                                                                                                                                                                                                                                                                                                                                                                                                                                                                                                                                                                                                                                                                                                                                                                                                                                                                                                                                                                                                                                                                                                                                                                                                                                                                                              |                                |        |        |        |  |      |   |    |     |    |       |       |       |       |       |                                 |  |  |  |  |        |   |    |     |    |   |        |        |        |        |   |        |        |        |        |   |        |        |        |        |   |        |        |        |        |   |        |        |        |        |   |        |        |        |        |   |        |        |        |        |   |        |        |        |        |   |        |        |        |        |    |        |        |        |        |    |        |        |        |        |    |        |        |        |        |    |        |        |        |        |    |        |        |        |        |    |        |        |        |        |    |        |        |        |        |    |        |        |        |        |    |        |        |        |        |    |        |        |        |        |    |        |        |        |        |    |        |        |        |        |
|                                 | III                            | 0.0000                 | 0.0000 | 0.0000 | 1.0000 | 0.0000                             | 0.0000 | 0.7756 | 0.2244 |                                                                                                                                                                                                                                                                                                                                                                                                                                                                                                                                                                                                                                                                                                                                                                                                                                                                                                                                                                                                                                                                                                                                                                                                                                                                                                                                                                                                                                                                                                                                                                                                                                                                                                                                                                                                                                                                                                                                                                                                                                                                                                                                                                                                                                                                                                                                                                                              |                                |        |        |        |  |      |   |    |     |    |       |       |       |       |       |                                 |  |  |  |  |        |   |    |     |    |   |        |        |        |        |   |        |        |        |        |   |        |        |        |        |   |        |        |        |        |   |        |        |        |        |   |        |        |        |        |   |        |        |        |        |   |        |        |        |        |   |        |        |        |        |    |        |        |        |        |    |        |        |        |        |    |        |        |        |        |    |        |        |        |        |    |        |        |        |        |    |        |        |        |        |    |        |        |        |        |    |        |        |        |        |    |        |        |        |        |    |        |        |        |        |    |        |        |        |        |    |        |        |        |        |
|                                 | IV                             | 0.0000                 | 0.0000 | 0.0000 | 1.0000 | 0.0000                             | 0.0000 | 0.0000 | 1.0000 |                                                                                                                                                                                                                                                                                                                                                                                                                                                                                                                                                                                                                                                                                                                                                                                                                                                                                                                                                                                                                                                                                                                                                                                                                                                                                                                                                                                                                                                                                                                                                                                                                                                                                                                                                                                                                                                                                                                                                                                                                                                                                                                                                                                                                                                                                                                                                                                              |                                |        |        |        |  |      |   |    |     |    |       |       |       |       |       |                                 |  |  |  |  |        |   |    |     |    |   |        |        |        |        |   |        |        |        |        |   |        |        |        |        |   |        |        |        |        |   |        |        |        |        |   |        |        |        |        |   |        |        |        |        |   |        |        |        |        |   |        |        |        |        |    |        |        |        |        |    |        |        |        |        |    |        |        |        |        |    |        |        |        |        |    |        |        |        |        |    |        |        |        |        |    |        |        |        |        |    |        |        |        |        |    |        |        |        |        |    |        |        |        |        |    |        |        |        |        |    |        |        |        |        |



|    |     |        |        |        |        |        |        |        |        |
|----|-----|--------|--------|--------|--------|--------|--------|--------|--------|
| 10 | I   | 0.9743 | 0.0000 | 0.0257 | 0.0000 | 1.0000 | 0.0000 | 0.0000 | 0.0000 |
|    | II  | 0.0000 | 0.0000 | 0.5903 | 0.4097 | 0.0000 | 0.0000 | 0.5913 | 0.4087 |
|    | III | 0.0000 | 0.0000 | 0.0000 | 1.0000 | 0.0000 | 0.0000 | 0.9307 | 0.0693 |
|    | IV  | 0.0000 | 0.0000 | 0.0000 | 1.0000 | 0.0000 | 0.0000 | 0.0000 | 1.0000 |
| 11 | I   | 0.9743 | 0.0000 | 0.0239 | 0.0018 | 0.6680 | 0.0000 | 0.3320 | 0.0000 |
|    | II  | 0.0000 | 0.0000 | 0.5494 | 0.4506 | 0.0000 | 0.0000 | 0.5913 | 0.4087 |
|    | III | 0.0000 | 0.0000 | 0.0000 | 1.0000 | 0.0000 | 0.0000 | 0.2678 | 0.7322 |
|    | IV  | 0.0000 | 0.0000 | 0.0000 | 1.0000 | 0.0000 | 0.0000 | 0.0000 | 1.0000 |
| 12 | I   | 0.6508 | 0.0000 | 0.3299 | 0.0193 | 1.0000 | 0.0000 | 0.0000 | 0.0000 |
|    | II  | 0.0000 | 0.0000 | 0.1471 | 0.8529 | 0.0000 | 0.0000 | 0.5913 | 0.4087 |
|    | III | 0.0000 | 0.0000 | 0.0000 | 1.0000 | 0.0000 | 0.0000 | 1.0000 | 0.0000 |
|    | IV  | 0.0000 | 0.0000 | 0.0000 | 1.0000 | 0.0000 | 0.0000 | 0.0000 | 1.0000 |
| 13 | I   | 0.6508 | 0.0000 | 0.3299 | 0.0193 | 1.0000 | 0.0000 | 0.0000 | 0.0000 |
|    | II  | 0.0000 | 0.0000 | 0.1471 | 0.8529 | 0.0000 | 0.0000 | 0.5913 | 0.4087 |
|    | III | 0.0000 | 0.0000 | 0.0000 | 1.0000 | 0.0000 | 0.0000 | 0.6141 | 0.3859 |
|    | IV  | 0.0000 | 0.0000 | 0.0000 | 1.0000 | 0.0000 | 0.0000 | 0.0000 | 1.0000 |
| 14 | I   | 0.6508 | 0.0000 | 0.2026 | 0.1466 | 0.5015 | 0.0000 | 0.4985 | 0.0000 |
|    | II  | 0.0000 | 0.0000 | 0.0904 | 0.9096 | 0.0000 | 0.0000 | 0.5913 | 0.4087 |
|    | III | 0.0000 | 0.0000 | 0.0000 | 1.0000 | 0.0000 | 0.0000 | 0.0000 | 1.0000 |
|    | IV  | 0.0000 | 0.0000 | 0.0000 | 1.0000 | 0.0000 | 0.0000 | 0.0000 | 1.0000 |
| 15 | I   | 0.3264 | 0.0000 | 0.3244 | 0.3492 | 1.0000 | 0.0000 | 0.0000 | 0.0000 |
|    | II  | 0.0000 | 0.0000 | 0.0000 | 1.0000 | 0.0000 | 0.0000 | 1.0000 | 0.0000 |
|    | III | 0.0000 | 0.0000 | 0.0000 | 1.0000 | 0.0000 | 0.0000 | 1.0000 | 0.0000 |
|    | IV  | 0.0000 | 0.0000 | 0.0000 | 1.0000 | 0.0000 | 0.0000 | 0.0000 | 1.0000 |
| 16 | I   | 0.3264 | 0.0000 | 0.3244 | 0.3492 | 1.0000 | 0.0000 | 0.0000 | 0.0000 |
|    | II  | 0.0000 | 0.0000 | 0.0000 | 1.0000 | 0.0000 | 0.0000 | 1.0000 | 0.0000 |
|    | III | 0.0000 | 0.0000 | 0.0000 | 1.0000 | 0.0000 | 0.0000 | 0.9042 | 0.0958 |
|    | IV  | 0.0000 | 0.0000 | 0.0000 | 1.0000 | 0.0000 | 0.0000 | 0.0000 | 1.0000 |
| 17 | I   | 0.3264 | 0.0000 | 0.2933 | 0.3803 | 1.0000 | 0.0000 | 0.0000 | 0.0000 |
|    | II  | 0.0000 | 0.0000 | 0.0000 | 1.0000 | 0.0000 | 0.0000 | 1.0000 | 0.0000 |
|    | III | 0.0000 | 0.0000 | 0.0000 | 1.0000 | 0.0000 | 0.0000 | 1.0000 | 0.0000 |
|    | IV  | 0.0000 | 0.0000 | 0.0000 | 1.0000 | 0.0000 | 0.0000 | 0.0000 | 1.0000 |
| 18 | I   | 0.3264 | 0.0000 | 0.2933 | 0.3803 | 0.6874 | 0.0000 | 0.0000 | 0.3126 |
|    | II  | 0.0000 | 0.0000 | 0.0000 | 1.0000 | 0.0000 | 0.0000 | 0.5913 | 0.4087 |
|    | III | 0.0000 | 0.0000 | 0.0000 | 1.0000 | 0.0000 | 0.0000 | 0.0000 | 1.0000 |
|    | IV  | 0.0000 | 0.0000 | 0.0000 | 1.0000 | 0.0000 | 0.0000 | 0.0000 | 1.0000 |
| 19 | I   | 0.2244 | 0.0000 | 0.0000 | 0.7756 | 0.7724 | 0.0000 | 0.2276 | 0.0000 |
|    | II  | 0.0000 | 0.0000 | 0.0000 | 1.0000 | 0.0000 | 0.0000 | 0.5913 | 0.4087 |
|    | III | 0.0000 | 0.0000 | 0.0000 | 1.0000 | 0.0000 | 0.0000 | 0.0080 | 0.9920 |
|    | IV  | 0.0000 | 0.0000 | 0.0000 | 1.0000 | 0.0000 | 0.0000 | 0.0000 | 1.0000 |

| Life Table ( $q_x$ via Eqn. 1; $T_x$ and $e_x$ Truncated at 10 Years) |        |        |                   |        |       |              |
|-----------------------------------------------------------------------|--------|--------|-------------------|--------|-------|--------------|
| Exam #                                                                | $q_x$  | $p_x$  | $l_x$             | $L_x$  | $T_x$ | $e_x$ (yrs.) |
| 1                                                                     | 0.0091 | 0.9909 | 1.0000            | 0.9954 | 17.08 | 8.54         |
| 2                                                                     | 0.0091 | 0.9909 | 0.9909            | 0.9864 | 16.08 | 8.11         |
| 3                                                                     | 0.0091 | 0.9909 | 0.9818            | 0.9774 | 15.09 | 7.69         |
| 4                                                                     | 0.0091 | 0.9909 | 0.9729            | 0.9684 | 14.12 | 7.26         |
| 5                                                                     | 0.0091 | 0.9909 | 0.9640            | 0.9596 | 13.15 | 6.82         |
| 6                                                                     | 0.0091 | 0.9909 | 0.9552            | 0.9508 | 12.19 | 6.38         |
| 7                                                                     | 0.0091 | 0.9909 | 0.9465            | 0.9422 | 11.24 | 5.94         |
| 8                                                                     | 0.0091 | 0.9909 | 0.9379            | 0.9336 | 10.30 | 5.49         |
| 9                                                                     | 0.0091 | 0.9909 | 0.9293            | 0.9251 | 9.36  | 5.04         |
| 10                                                                    | 0.0099 | 0.9901 | 0.9208            | 0.9163 | 8.44  | 4.58         |
| 11                                                                    | 0.0101 | 0.9899 | 0.9117            | 0.9071 | 7.52  | 4.12         |
| 12                                                                    | 0.0215 | 0.9785 | 0.9025            | 0.8928 | 6.61  | 3.66         |
| 13                                                                    | 0.0215 | 0.9785 | 0.8831            | 0.8736 | 5.72  | 3.24         |
| 14                                                                    | 0.0359 | 0.9641 | 0.8642            | 0.8486 | 4.85  | 2.80         |
| 15                                                                    | 0.0684 | 0.9316 | 0.8331            | 0.8046 | 4.00  | 2.40         |
| 16                                                                    | 0.0684 | 0.9316 | 0.7761            | 0.7496 | 3.19  | 2.06         |
| 17                                                                    | 0.0719 | 0.9281 | 0.7230            | 0.6970 | 2.44  | 1.69         |
| 18                                                                    | 0.0719 | 0.9281 | 0.6710            | 0.6469 | 1.75  | 1.30         |
| 19                                                                    | 0.1198 | 0.8802 | 0.6227            | 0.5854 | 1.10  | 0.88         |
| 20                                                                    | 0.1213 | 0.8787 | 0.5482            | 0.5149 | 0.51  | 0.47         |
| 21                                                                    | 0.1493 | 0.8507 | 0.4817            | 0.0000 | 0.00  | 0.00         |
| <b>Truncated life expectancy =</b>                                    |        |        | <b>8.54 years</b> |        |       |              |

|    |     |        |        |        |        |        |        |        |        |
|----|-----|--------|--------|--------|--------|--------|--------|--------|--------|
| 20 | I   | 0.1733 | 0.0000 | 0.0511 | 0.7756 | 0.0000 | 0.0000 | 0.1266 | 0.8734 |
|    | II  | 0.0000 | 0.0000 | 0.0000 | 1.0000 | 0.0000 | 0.0000 | 0.2688 | 0.7312 |
|    | III | 0.0000 | 0.0000 | 0.0000 | 1.0000 | 0.0000 | 0.0000 | 0.0020 | 0.9980 |
|    | IV  | 0.0000 | 0.0000 | 0.0000 | 1.0000 | 0.0000 | 0.0000 | 0.0000 | 1.0000 |
| 21 | I   | 0.0000 | 0.0000 | 0.0220 | 0.9780 | —      | —      | —      | —      |
|    | II  | 0.0000 | 0.0000 | 0.0000 | 1.0000 | —      | —      | —      | —      |
|    | III | 0.0000 | 0.0000 | 0.0000 | 1.0000 | —      | —      | —      | —      |
|    | IV  | 0.0000 | 0.0000 | 0.0000 | 1.0000 | —      | —      | —      | —      |

**Web Table A7: Transition Matrices, Probabilities of Death, and 10-Year Life-Table Analysis in the 3-D Model of AD Progression in the Predictors 1 Data, Type I Females**

| Exam # | Type | Inputs to Equation (4) |        |        |        | Alternative Inputs to Equation (4) |        |        |        | 6-Month Probabilities of Death (from Table 1) |        |        |        |        |
|--------|------|------------------------|--------|--------|--------|------------------------------------|--------|--------|--------|-----------------------------------------------|--------|--------|--------|--------|
|        |      | V-matrices             |        |        |        | U-matrices                         |        |        |        | Type                                          | I      | II     | III    | IV     |
|        |      | I                      | II     | III    | IV     | I                                  | II     | III    | IV     | Value                                         | 0.0038 | 0.0012 | 0.0940 | 0.0991 |
| 1      | I    | 1.0000                 | 0.0000 | 0.0000 | 0.0000 | 1.0000                             | 0.0000 | 0.0000 | 0.0000 |                                               |        |        |        |        |
|        | II   | 0.0000                 | 1.0000 | 0.0000 | 0.0000 | 0.0000                             | 1.0000 | 0.0000 | 0.0000 |                                               |        |        |        |        |
|        | III  | 0.0000                 | 0.0000 | 1.0000 | 0.0000 | 0.0000                             | 0.0000 | 1.0000 | 0.0000 |                                               |        |        |        |        |
|        | IV   | 0.0000                 | 0.0000 | 0.0000 | 1.0000 | 0.0000                             | 0.0000 | 0.0000 | 1.0000 |                                               |        |        |        |        |
| 2      | I    | 1.0000                 | 0.0000 | 0.0000 | 0.0000 | 1.0000                             | 0.0000 | 0.0000 | 0.0000 |                                               |        |        |        |        |
|        | II   | 0.0000                 | 1.0000 | 0.0000 | 0.0000 | 0.0000                             | 1.0000 | 0.0000 | 0.0000 |                                               |        |        |        |        |
|        | III  | 0.0000                 | 0.0000 | 1.0000 | 0.0000 | 0.0000                             | 0.0000 | 1.0000 | 0.0000 |                                               |        |        |        |        |
|        | IV   | 0.0000                 | 0.0000 | 0.0000 | 1.0000 | 0.0000                             | 0.0000 | 0.0000 | 1.0000 |                                               |        |        |        |        |
| 3      | I    | 1.0000                 | 0.0000 | 0.0000 | 0.0000 | 1.0000                             | 0.0000 | 0.0000 | 0.0000 |                                               |        |        |        |        |
|        | II   | 0.0000                 | 1.0000 | 0.0000 | 0.0000 | 0.0000                             | 0.8297 | 0.0000 | 0.1703 |                                               |        |        |        |        |
|        | III  | 0.0000                 | 0.0000 | 1.0000 | 0.0000 | 0.0000                             | 0.0000 | 1.0000 | 0.0000 |                                               |        |        |        |        |
|        | IV   | 0.0000                 | 0.0000 | 0.0000 | 1.0000 | 0.0000                             | 0.0000 | 0.0000 | 1.0000 |                                               |        |        |        |        |
| 4      | I    | 1.0000                 | 0.0000 | 0.0000 | 0.0000 | 1.0000                             | 0.0000 | 0.0000 | 0.0000 |                                               |        |        |        |        |
|        | II   | 0.0000                 | 0.8297 | 0.0000 | 0.1703 | 0.0000                             | 0.7802 | 0.0000 | 0.2198 |                                               |        |        |        |        |
|        | III  | 0.0000                 | 0.0000 | 1.0000 | 0.0000 | 0.0000                             | 0.0000 | 1.0000 | 0.0000 |                                               |        |        |        |        |
|        | IV   | 0.0000                 | 0.0000 | 0.0000 | 1.0000 | 0.0000                             | 0.0000 | 0.0000 | 1.0000 |                                               |        |        |        |        |
| 5      | I    | 1.0000                 | 0.0000 | 0.0000 | 0.0000 | 0.3509                             | 0.6491 | 0.0000 | 0.0000 |                                               |        |        |        |        |
|        | II   | 0.0000                 | 0.6474 | 0.0000 | 0.3526 | 0.0000                             | 0.0000 | 0.0000 | 1.0000 |                                               |        |        |        |        |
|        | III  | 0.0000                 | 0.0000 | 1.0000 | 0.0000 | 0.0000                             | 0.0000 | 1.0000 | 0.0000 |                                               |        |        |        |        |
|        | IV   | 0.0000                 | 0.0000 | 0.0000 | 1.0000 | 0.0000                             | 0.0000 | 0.0000 | 1.0000 |                                               |        |        |        |        |
| 6      | I    | 0.3509                 | 0.6491 | 0.0000 | 0.0000 | 0.5279                             | 0.4721 | 0.0000 | 0.0000 |                                               |        |        |        |        |
|        | II   | 0.0000                 | 0.0000 | 0.0000 | 1.0000 | 0.0000                             | 1.0000 | 0.0000 | 0.0000 |                                               |        |        |        |        |
|        | III  | 0.0000                 | 0.0000 | 1.0000 | 0.0000 | 0.0000                             | 0.0000 | 1.0000 | 0.0000 |                                               |        |        |        |        |
|        | IV   | 0.0000                 | 0.0000 | 0.0000 | 1.0000 | 0.0000                             | 0.0000 | 0.0000 | 1.0000 |                                               |        |        |        |        |
| 7      | I    | 0.1852                 | 0.8148 | 0.0000 | 0.0000 | 0.0000                             | 1.0000 | 0.0000 | 0.0000 |                                               |        |        |        |        |
|        | II   | 0.0000                 | 0.0000 | 0.0000 | 1.0000 | 0.0000                             | 1.0000 | 0.0000 | 0.0000 |                                               |        |        |        |        |
|        | III  | 0.0000                 | 0.0000 | 1.0000 | 0.0000 | 0.0000                             | 0.0000 | 1.0000 | 0.0000 |                                               |        |        |        |        |
|        | IV   | 0.0000                 | 0.0000 | 0.0000 | 1.0000 | 0.0000                             | 0.0000 | 0.0000 | 1.0000 |                                               |        |        |        |        |
| 8      | I    | 0.0000                 | 1.0000 | 0.0000 | 0.0000 | 1.0000                             | 0.0000 | 0.0000 | 0.0000 |                                               |        |        |        |        |
|        | II   | 0.0000                 | 0.0000 | 0.0000 | 1.0000 | 0.0000                             | 0.9558 | 0.0000 | 0.0442 |                                               |        |        |        |        |
|        | III  | 0.0000                 | 0.0000 | 1.0000 | 0.0000 | 0.0000                             | 0.0000 | 0.9428 | 0.0572 |                                               |        |        |        |        |
|        | IV   | 0.0000                 | 0.0000 | 0.0000 | 1.0000 | 0.0000                             | 0.0000 | 0.0000 | 1.0000 |                                               |        |        |        |        |
| 9      | I    | 0.0000                 | 0.9558 | 0.0000 | 0.0442 | 0.0000                             | 1.0000 | 0.0000 | 0.0000 |                                               |        |        |        |        |
|        | II   | 0.0000                 | 0.0000 | 0.0000 | 1.0000 | 0.0000                             | 0.8504 | 0.0000 | 0.1496 |                                               |        |        |        |        |
|        | III  | 0.0000                 | 0.0000 | 0.9428 | 0.0572 | 0.0000                             | 0.0000 | 1.0000 | 0.0000 |                                               |        |        |        |        |
|        | IV   | 0.0000                 | 0.0000 | 0.0000 | 1.0000 | 0.0000                             | 0.0000 | 0.0000 | 1.0000 |                                               |        |        |        |        |

  

| Template for 10-Year Life-Table Analysis |       |       |       |       |
|------------------------------------------|-------|-------|-------|-------|
| Initial GoM Scores (at Exam 1)           |       |       |       |       |
| Type                                     | I     | II    | III   | IV    |
| Value                                    | 1.000 | 0.000 | 0.000 | 0.000 |

  

| GoM Scores by Exam (via Eqn. 4) |        |        |        |        |
|---------------------------------|--------|--------|--------|--------|
| Exam #                          | I      | II     | III    | IV     |
| 1                               | 1.0000 | 0.0000 | 0.0000 | 0.0000 |
| 2                               | 1.0000 | 0.0000 | 0.0000 | 0.0000 |
| 3                               | 1.0000 | 0.0000 | 0.0000 | 0.0000 |
| 4                               | 1.0000 | 0.0000 | 0.0000 | 0.0000 |
| 5                               | 1.0000 | 0.0000 | 0.0000 | 0.0000 |
| 6                               | 0.3509 | 0.6491 | 0.0000 | 0.0000 |
| 7                               | 0.1852 | 0.8148 | 0.0000 | 0.0000 |
| 8                               | 0.0000 | 1.0000 | 0.0000 | 0.0000 |
| 9                               | 0.0000 | 0.9558 | 0.0000 | 0.0442 |
| 10                              | 0.0000 | 0.8128 | 0.0000 | 0.1872 |
| 11                              | 0.0000 | 0.6503 | 0.0000 | 0.3497 |
| 12                              | 0.0000 | 0.5361 | 0.0000 | 0.4639 |
| 13                              | 0.0000 | 0.3619 | 0.0000 | 0.6381 |
| 14                              | 0.0000 | 0.2411 | 0.0000 | 0.7589 |
| 15                              | 0.0000 | 0.1126 | 0.0000 | 0.8874 |
| 16                              | 0.0000 | 0.0790 | 0.0000 | 0.9210 |
| 17                              | 0.0000 | 0.0607 | 0.0000 | 0.9393 |
| 18                              | 0.0000 | 0.0453 | 0.0000 | 0.9547 |
| 19                              | 0.0000 | 0.0312 | 0.0000 | 0.9688 |
| 20                              | 0.0000 | 0.0312 | 0.0000 | 0.9688 |
| 21                              | 0.0000 | 0.0113 | 0.0000 | 0.9887 |

|    |     |        |        |        |        |        |        |        |        |
|----|-----|--------|--------|--------|--------|--------|--------|--------|--------|
| 10 | I   | 0.0000 | 0.8128 | 0.0000 | 0.1872 | 0.0000 | 1.0000 | 0.0000 | 0.0000 |
|    | II  | 0.0000 | 0.0000 | 0.0000 | 1.0000 | 0.0000 | 0.8000 | 0.0000 | 0.2000 |
|    | III | 0.0000 | 0.0000 | 0.9428 | 0.0572 | 0.0000 | 0.0000 | 0.9709 | 0.0291 |
|    | IV  | 0.0000 | 0.0000 | 0.0000 | 1.0000 | 0.0000 | 0.0000 | 0.0000 | 1.0000 |
| 11 | I   | 0.0000 | 0.6503 | 0.0000 | 0.3497 | 0.0000 | 1.0000 | 0.0000 | 0.0000 |
|    | II  | 0.0000 | 0.0000 | 0.0000 | 1.0000 | 0.0000 | 0.8245 | 0.0000 | 0.1755 |
|    | III | 0.0000 | 0.0000 | 0.9153 | 0.0847 | 0.0000 | 0.0000 | 0.7688 | 0.2312 |
|    | IV  | 0.0000 | 0.0000 | 0.0000 | 1.0000 | 0.0000 | 0.0000 | 0.0000 | 1.0000 |
| 12 | I   | 0.0000 | 0.5361 | 0.0000 | 0.4639 | 0.0000 | 1.0000 | 0.0000 | 0.0000 |
|    | II  | 0.0000 | 0.0000 | 0.0000 | 1.0000 | 0.0000 | 0.6750 | 0.0000 | 0.3250 |
|    | III | 0.0000 | 0.0000 | 0.7037 | 0.2963 | 0.0000 | 0.0000 | 0.9630 | 0.0370 |
|    | IV  | 0.0000 | 0.0000 | 0.0000 | 1.0000 | 0.0000 | 0.0000 | 0.0000 | 1.0000 |
| 13 | I   | 0.0000 | 0.3619 | 0.0000 | 0.6381 | 0.0000 | 1.0000 | 0.0000 | 0.0000 |
|    | II  | 0.0000 | 0.0000 | 0.0000 | 1.0000 | 0.0000 | 0.6662 | 0.0000 | 0.3338 |
|    | III | 0.0000 | 0.0000 | 0.6777 | 0.3223 | 0.0000 | 0.0000 | 0.8815 | 0.1185 |
|    | IV  | 0.0000 | 0.0000 | 0.0000 | 1.0000 | 0.0000 | 0.0000 | 0.0000 | 1.0000 |
| 14 | I   | 0.0000 | 0.2411 | 0.0000 | 0.7589 | 0.0000 | 1.0000 | 0.0000 | 0.0000 |
|    | II  | 0.0000 | 0.0000 | 0.0000 | 1.0000 | 0.0000 | 0.4669 | 0.0000 | 0.5331 |
|    | III | 0.0000 | 0.0000 | 0.5974 | 0.4026 | 0.0000 | 0.0000 | 1.0000 | 0.0000 |
|    | IV  | 0.0000 | 0.0000 | 0.0000 | 1.0000 | 0.0000 | 0.0000 | 0.0000 | 1.0000 |
| 15 | I   | 0.0000 | 0.1126 | 0.0000 | 0.8874 | 0.0000 | 1.0000 | 0.0000 | 0.0000 |
|    | II  | 0.0000 | 0.0000 | 0.0000 | 1.0000 | 0.0000 | 0.7021 | 0.0000 | 0.2979 |
|    | III | 0.0000 | 0.0000 | 0.5974 | 0.4026 | 0.0000 | 0.0000 | 0.9427 | 0.0573 |
|    | IV  | 0.0000 | 0.0000 | 0.0000 | 1.0000 | 0.0000 | 0.0000 | 0.0000 | 1.0000 |
| 16 | I   | 0.0000 | 0.0790 | 0.0000 | 0.9210 | 0.0000 | 1.0000 | 0.0000 | 0.0000 |
|    | II  | 0.0000 | 0.0000 | 0.0000 | 1.0000 | 0.0000 | 0.7677 | 0.0000 | 0.2323 |
|    | III | 0.0000 | 0.0000 | 0.5632 | 0.4368 | 0.0000 | 0.0000 | 1.0000 | 0.0000 |
|    | IV  | 0.0000 | 0.0000 | 0.0000 | 1.0000 | 0.0000 | 0.0000 | 0.0000 | 1.0000 |
| 17 | I   | 0.0000 | 0.0607 | 0.0000 | 0.9393 | 0.0000 | 1.0000 | 0.0000 | 0.0000 |
|    | II  | 0.0000 | 0.0000 | 0.0000 | 1.0000 | 0.0000 | 0.7472 | 0.0000 | 0.2528 |
|    | III | 0.0000 | 0.0000 | 0.5632 | 0.4368 | 0.0000 | 0.0000 | 1.0000 | 0.0000 |
|    | IV  | 0.0000 | 0.0000 | 0.0000 | 1.0000 | 0.0000 | 0.0000 | 0.0000 | 1.0000 |
| 18 | I   | 0.0000 | 0.0453 | 0.0000 | 0.9547 | 0.0000 | 1.0000 | 0.0000 | 0.0000 |
|    | II  | 0.0000 | 0.0000 | 0.0000 | 1.0000 | 0.0000 | 0.6873 | 0.0000 | 0.3127 |
|    | III | 0.0000 | 0.0000 | 0.5632 | 0.4368 | 0.0000 | 0.0000 | 1.0000 | 0.0000 |
|    | IV  | 0.0000 | 0.0000 | 0.0000 | 1.0000 | 0.0000 | 0.0000 | 0.0000 | 1.0000 |
| 19 | I   | 0.0000 | 0.0312 | 0.0000 | 0.9688 | 0.0000 | 1.0000 | 0.0000 | 0.0000 |
|    | II  | 0.0000 | 0.0000 | 0.0000 | 1.0000 | 0.0000 | 1.0000 | 0.0000 | 0.0000 |
|    | III | 0.0000 | 0.0000 | 0.5632 | 0.4368 | 0.0000 | 0.0000 | 0.4769 | 0.5231 |
|    | IV  | 0.0000 | 0.0000 | 0.0000 | 1.0000 | 0.0000 | 0.0000 | 0.0000 | 1.0000 |

| Life Table ( $q_x$ via Eqn. 1; $T_x$ and $e_x$ Truncated at 10 Years) |        |        |            |        |       |              |
|-----------------------------------------------------------------------|--------|--------|------------|--------|-------|--------------|
| Exam #                                                                | $q_x$  | $p_x$  | $l_x$      | $L_x$  | $T_x$ | $e_x$ (yrs.) |
| 1                                                                     | 0.0038 | 0.9962 | 1.0000     | 0.9981 | 16.75 | 8.38         |
| 2                                                                     | 0.0038 | 0.9962 | 0.9962     | 0.9943 | 15.75 | 7.91         |
| 3                                                                     | 0.0038 | 0.9962 | 0.9924     | 0.9905 | 14.76 | 7.44         |
| 4                                                                     | 0.0038 | 0.9962 | 0.9887     | 0.9868 | 13.77 | 6.96         |
| 5                                                                     | 0.0038 | 0.9962 | 0.9849     | 0.9830 | 12.78 | 6.49         |
| 6                                                                     | 0.0021 | 0.9979 | 0.9812     | 0.9802 | 11.80 | 6.01         |
| 7                                                                     | 0.0017 | 0.9983 | 0.9791     | 0.9783 | 10.82 | 5.53         |
| 8                                                                     | 0.0012 | 0.9988 | 0.9775     | 0.9769 | 9.84  | 5.03         |
| 9                                                                     | 0.0055 | 0.9945 | 0.9764     | 0.9737 | 8.86  | 4.54         |
| 10                                                                    | 0.0195 | 0.9805 | 0.9710     | 0.9616 | 7.89  | 4.06         |
| 11                                                                    | 0.0354 | 0.9646 | 0.9521     | 0.9352 | 6.93  | 3.64         |
| 12                                                                    | 0.0466 | 0.9534 | 0.9184     | 0.8970 | 5.99  | 3.26         |
| 13                                                                    | 0.0636 | 0.9364 | 0.8756     | 0.8477 | 5.10  | 2.91         |
| 14                                                                    | 0.0755 | 0.9245 | 0.8199     | 0.7889 | 4.25  | 2.59         |
| 15                                                                    | 0.0881 | 0.9119 | 0.7580     | 0.7246 | 3.46  | 2.28         |
| 16                                                                    | 0.0913 | 0.9087 | 0.6912     | 0.6597 | 2.74  | 1.98         |
| 17                                                                    | 0.0931 | 0.9069 | 0.6281     | 0.5988 | 2.08  | 1.65         |
| 18                                                                    | 0.0946 | 0.9054 | 0.5696     | 0.5426 | 1.48  | 1.30         |
| 19                                                                    | 0.0960 | 0.9040 | 0.5157     | 0.4909 | 0.93  | 0.91         |
| 20                                                                    | 0.0960 | 0.9040 | 0.4662     | 0.4438 | 0.44  | 0.48         |
| 21                                                                    | 0.0980 | 0.9020 | 0.4214     | 0.0000 | 0.00  | 0.00         |
| Truncated life expectancy =                                           |        |        | 8.38 years |        |       |              |

|    |     |        |        |        |        |        |        |        |        |
|----|-----|--------|--------|--------|--------|--------|--------|--------|--------|
| 20 | I   | 0.0000 | 0.0312 | 0.0000 | 0.9688 | 0.0000 | 1.0000 | 0.0000 | 0.0000 |
|    | II  | 0.0000 | 0.0000 | 0.0000 | 1.0000 | 0.0000 | 0.3632 | 0.0000 | 0.6368 |
|    | III | 0.0000 | 0.0000 | 0.2686 | 0.7314 | 0.0000 | 0.0000 | 1.0000 | 0.0000 |
|    | IV  | 0.0000 | 0.0000 | 0.0000 | 1.0000 | 0.0000 | 0.0000 | 0.0000 | 1.0000 |
| 21 | I   | 0.0000 | 0.0113 | 0.0000 | 0.9887 | —      | —      | —      | —      |
|    | II  | 0.0000 | 0.0000 | 0.0000 | 1.0000 | —      | —      | —      | —      |
|    | III | 0.0000 | 0.0000 | 0.2686 | 0.7314 | —      | —      | —      | —      |
|    | IV  | 0.0000 | 0.0000 | 0.0000 | 1.0000 | —      | —      | —      | —      |
